# Supplementary material for: Discovery of novel and potent CDK8 inhibitors for the treatment of acute myeloid leukaemia
Source: PubMed Central journal article supplement (PMC10810651; doi:10.1080/14756366.2024.2305852), 2024-01-23

# Discovery of novel and potent CDK8 inhibitors for the treatment of acute myeloid leukemia

Zhuoying Chen<sup>§, ‡</sup>, Quan Wang<sup>§, ‡</sup>, Yao Yao Yan<sup>‡</sup>, Dalong Jin<sup>‡</sup>, Yumeng Wang<sup>‡</sup>,  
Xing Xing Zhang<sup>\*, †</sup>, Xin Hua Liu<sup>\*, ‡</sup>

<sup>‡</sup> *School of Pharmacy, Anhui Medical University, Hefei, 230032, P. R. China*

<sup>†</sup> *School of Biology, Food and Environment, Hefei University, Hefei, 230601, China*

## Contents

|                                                       |    |
|-------------------------------------------------------|----|
| 1. Experimental section .....                         | S1 |
| 2. <sup>1</sup> H NMR, <sup>13</sup> C NMR, HRMS..... | S2 |

## 1. Experimental section

### 1.1 General methods for chemistry

Reactions were monitored by thin layer chromatography (TLC) on pre-coated silica GF<sub>254</sub> plates. <sup>1</sup>H and <sup>13</sup>C NMR spectra are obtained by Agilent DD2 500 MHz (<sup>1</sup>H, 500 MHz; <sup>13</sup>C, 126 MHz) spectrometer with DMSO-*d*<sub>6</sub> as the solvents and TMS as the internal standard. High-resolution mass spectrometry (HRMS) was recorded on an Agilent Technologies LC-TOF instrument.

#### *General procedure for synthesis of compound 1*

Compound **a1** (165 mg, 1.0 mmol), compound **b1** (238 mg, 1.2 mmol), K<sub>2</sub>CO<sub>3</sub> (552 mg, 4.00 mmol), Pd(dppf)Cl<sub>2</sub> (72 mg, 0.1 mmol), 1,4-dioxane (15 mL) and H<sub>2</sub>O (4 mL) were added into flask, then stirred at 80 °C for 20 h under nitrogen. After the reaction was completed, it was added ethyl acetate and H<sub>2</sub>O, then the mixture was extracted with ethyl acetate (60 mL×2), washed with saturated brine solution, dried over anhydrous Na<sub>2</sub>SO<sub>4</sub>, and concentrated to give the yellow solid, then purified by chromatography (gradient elution of PE/EA 10/90, v/v) to obtain compound **1**.

#### *3-(5H-pyrrolo[2,3-b]pyrazin-2-yl)benzamide (1)*

<sup>1</sup>H NMR (500 MHz, DMSO-*d*<sub>6</sub>)  $\delta$  12.14 (s, 1H), 8.95 (s, 1H), 8.66 (s, 1H), 8.30 (d, *J* = 6.7 Hz, 1H), 8.17 (s, 1H), 7.95 (s, 2H), 7.62 (t, *J* = 7.0 Hz, 1H), 7.47 (s, 1H), 6.74 (s, 1H). <sup>13</sup>C NMR (126 MHz, DMSO-*d*<sub>6</sub>)  $\delta$  168.31, 145.38, 141.11, 139.01, 138.43, 135.40, 135.21, 132.61, 129.59, 129.30, 127.95, 125.98, 101.16. HRMS (ESI): *m/z* [M+H]<sup>+</sup> calcd for C<sub>13</sub>H<sub>10</sub>N<sub>4</sub>O:239.0927; found:239.0927.

#### *General procedure for synthesis of compounds 2-11*

Compounds **2-11** were obtained according to the similar procedures with compound **1**.

#### *3-(1H-pyrazolo[3,4-b]pyridin-5-yl)benzamide (2)*

<sup>1</sup>H NMR (400 MHz, DMSO-*d*<sub>6</sub>)  $\delta$  13.76 (s, 1H), 8.92 (d, *J* = 2.2 Hz, 1H), 8.56 (d, *J* = 2.1 Hz, 1H), 8.28 – 8.20 (m, 2H), 8.13 (s, 1H), 7.91 (td, *J* = 8.2, 1.5 Hz, 2H), 7.59 (t, *J* = 7.7 Hz, 1H), 7.47 (s, 1H). <sup>13</sup>C NMR (101 MHz, DMSO-*d*<sub>6</sub>)  $\delta$  168.15, 151.80, 148.61, 138.42, 135.54, 134.16, 130.24, 129.60, 129.23, 128.29, 127.07, 126.45, 115.03. HRMS (ESI): *m/z* [M+H]<sup>+</sup> calcd for C<sub>13</sub>H<sub>10</sub>N<sub>4</sub>O:239.0927; found:239.0929.

*3-(6-aminopyridin-3-yl)benzamide (3)*

<sup>1</sup>H NMR (400 MHz, DMSO-*d*<sub>6</sub>) δ 8.33 (d, *J* = 2.2 Hz, 1H), 8.09 (s, 1H), 8.07 (s, 1H), 7.77 (dd, *J* = 8.6, 2.5 Hz, 2H), 7.72 (d, *J* = 8.2 Hz, 1H), 7.48 (t, *J* = 7.7 Hz, 1H), 7.44 (s, 1H), 6.55 (d, *J* = 8.6 Hz, 1H), 6.15 (s, 2H). <sup>13</sup>C NMR (101 MHz, DMSO-*d*<sub>6</sub>) δ 168.39, 159.86, 146.42, 138.55, 135.91, 135.31, 129.34, 128.45, 125.91, 124.65, 123.70, 108.42. HRMS (ESI): *m/z* [M+H]<sup>+</sup> calcd for C<sub>12</sub>H<sub>11</sub>N<sub>3</sub>O:214.0975; found:214.0974.

*3-(6-amino-5-chloropyridin-3-yl)benzamide (4)*

<sup>1</sup>H NMR (400 MHz, DMSO-*d*<sub>6</sub>) δ 8.36 (d, *J* = 2.1 Hz, 1H), 8.11 (s, 2H), 8.02 (d, *J* = 2.2 Hz, 1H), 7.80 (ddd, *J* = 6.6, 4.1, 1.6 Hz, 2H), 7.50 (t, *J* = 7.8 Hz, 1H), 7.46 (s, 1H), 6.51 (s, 2H). <sup>13</sup>C NMR (101 MHz, DMSO-*d*<sub>6</sub>) δ 168.20, 155.53, 144.90, 136.99, 135.35, 135.10, 129.45, 128.75, 126.58, 125.32, 124.87, 114.08. HRMS (ESI): *m/z* [M+H]<sup>+</sup> calcd for C<sub>12</sub>H<sub>10</sub>N<sub>3</sub>OCl:239.0927; found:248.0583.

*3-(isoquinolin-4-yl)benzamide (5)*

<sup>1</sup>H NMR (500 MHz, DMSO-*d*<sub>6</sub>) δ 9.39 (s, 1H), 8.51 (s, 1H), 8.25 (d, *J* = 8.1 Hz, 1H), 8.12 (s, 1H), 8.08 (s, 1H), 8.05 (d, *J* = 7.6 Hz, 1H), 7.83 (q, *J* = 8.4 Hz, 2H), 7.76 (t, *J* = 7.1 Hz, 1H), 7.73 (d, *J* = 7.5 Hz, 1H), 7.68 (t, *J* = 7.6 Hz, 1H), 7.49 (s, 1H). <sup>13</sup>C NMR (126 MHz, DMSO-*d*<sub>6</sub>) δ 168.05, 152.75, 143.09, 136.87, 135.25, 133.58, 133.12, 132.41, 131.74, 129.31, 129.25, 128.62, 128.47, 128.07, 127.70, 124.40. HRMS (ESI): *m/z* [M+H]<sup>+</sup> calcd for C<sub>16</sub>H<sub>12</sub>N<sub>2</sub>O:249.1022; found:249.1022.

*3-(1-aminoisoquinolin-4-yl)benzamide (6)*

<sup>1</sup>H NMR (500 MHz, DMSO-*d*<sub>6</sub>) δ 8.33 (d, *J* = 6.0 Hz, 1H), 8.10 (s, 1H), 7.96 (s, 1H), 7.92 (d, *J* = 6.5 Hz, 1H), 7.81 (s, 1H), 7.71 – 7.62 (m, 2H), 7.59 (dd, *J* = 9.5, 4.2 Hz, 2H), 7.54 (ddd, *J* = 8.1, 5.8, 2.5 Hz, 1H), 7.41 (s, 1H), 6.97 (s, 2H). <sup>13</sup>C NMR (126 MHz, DMSO-*d*<sub>6</sub>) δ 168.38, 157.69, 142.31, 138.40, 135.23, 135.07, 133.09, 130.78, 129.25, 128.97, 126.49, 125.98, 124.94, 124.23, 121.97, 117.10. HRMS (ESI): *m/z* [M+H]<sup>+</sup> calcd for C<sub>16</sub>H<sub>13</sub>N<sub>3</sub>O:264.1131; found:264.1131.

*3-(1H-indol-5-yl)benzamide (7)*

<sup>1</sup>H NMR (400 MHz, DMSO-*d*<sub>6</sub>) δ 11.21 (s, 1H), 8.21 (s, 1H), 8.15 (s, 1H), 7.91 (s, 1H), 7.87 – 7.75 (m, 2H), 7.53 (d, *J* = 7.6 Hz, 1H), 7.50 (s, 1H), 7.48 (d, *J* = 1.4 Hz,

1H), 7.46 (s, 1H), 7.41 (t,  $J = 2.7$  Hz, 1H), 6.52 (s, 1H).  $^{13}\text{C}$  NMR (101 MHz, DMSO- $d_6$ )  $\delta$  184.70, 168.55, 142.30, 136.08, 135.25, 131.16, 129.82, 129.21, 128.73, 126.67, 126.11, 125.83, 120.88, 118.83, 112.32, 102.05. HRMS (ESI):  $m/z$   $[\text{M}+\text{H}]^+$  calcd for  $\text{C}_{15}\text{H}_{11}\text{N}_2\text{O}$ :237.1022; found:237.1019.

*3-(1-methyl-1H-indol-5-yl)benzamide (8)*

$^1\text{H}$  NMR (500 MHz, DMSO- $d_6$ )  $\delta$  8.21 (d,  $J = 1.5$  Hz, 1H), 8.11 (s, 1H), 7.91 (s, 1H), 7.82 (td,  $J = 7.8, 1.5$  Hz, 2H), 7.52 (dd,  $J = 13.8, 4.3$  Hz, 3H), 7.39 (s, 1H), 7.37 (d,  $J = 3.0$  Hz, 1H), 6.50 (d,  $J = 3.0$  Hz, 1H), 3.82 (s, 3H).  $^{13}\text{C}$  NMR (126 MHz, DMSO- $d_6$ )  $\delta$  168.53, 142.11, 136.63, 135.31, 131.25, 130.94, 129.83, 129.22, 129.09, 126.11, 125.91, 120.90, 119.09, 110.62, 101.33, 33.04. HRMS (ESI):  $m/z$   $[\text{M}+\text{H}]^+$  calcd for  $\text{C}_{16}\text{H}_{14}\text{N}_2\text{O}$ :251.1179; found:251.1182.

*3-(benzofuran-5-yl)benzamide (9)*

$^1\text{H}$  NMR (500 MHz, DMSO- $d_6$ )  $\delta$  8.22 (s, 1H), 8.13 (s, 1H), 8.06 (d,  $J = 2.1$  Hz, 1H), 8.01 (d,  $J = 1.4$  Hz, 1H), 7.86 (dd,  $J = 14.1, 7.8$  Hz, 2H), 7.69 (dt,  $J = 8.6, 5.2$  Hz, 2H), 7.56 (t,  $J = 7.7$  Hz, 1H), 7.44 (s, 1H), 7.06 – 7.00 (m, 1H).  $^{13}\text{C}$  NMR (126 MHz, DMSO- $d_6$ )  $\delta$  168.34, 154.57, 147.25, 141.02, 135.41, 135.39, 130.13, 129.37, 128.42, 126.66, 126.44, 124.13, 120.07, 112.10, 107.48. HRMS (ESI):  $m/z$   $[\text{M}+\text{H}]^+$  calcd for  $\text{C}_{15}\text{H}_{11}\text{NO}_2$ :238.0863; found:238.0861.

*3-(benzo[b]thiophen-5-yl)benzamide (10)*

$^1\text{H}$  NMR (500 MHz, DMSO- $d_6$ )  $\delta$  8.27 (d,  $J = 4.7$  Hz, 2H), 8.19 (s, 1H), 8.12 (d,  $J = 8.4$  Hz, 1H), 7.91 (d,  $J = 1.7$  Hz, 1H), 7.89 (d,  $J = 1.7$  Hz, 1H), 7.83 (d,  $J = 5.4$  Hz, 1H), 7.76 (dd,  $J = 8.4, 1.7$  Hz, 1H), 7.58 (t,  $J = 7.7$  Hz, 1H), 7.54 (d,  $J = 5.4$  Hz, 1H), 7.45 (s, 1H).  $^{13}\text{C}$  NMR (126 MHz, DMSO- $d_6$ )  $\delta$  168.31, 140.70, 140.69, 139.05, 136.49, 135.47, 130.07, 129.44, 128.79, 126.94, 126.40, 124.73, 123.87, 123.57, 122.23. HRMS (ESI):  $m/z$   $[\text{M}+\text{H}]^+$  calcd for  $\text{C}_{15}\text{H}_{11}\text{NOS}$ :254.0634; found: 254.0639.

*3-(3-chloro-1H-pyrrolo[2,3-b]pyridin-5-yl)benzamide (11)*

$^1\text{H}$  NMR (500 MHz, DMSO- $d_6$ )  $\delta$  12.24 (s, 1H), 8.73 (d,  $J = 2.1$  Hz, 1H), 8.55 (d,  $J = 2.1$  Hz, 1H), 8.23 (s, 1H), 8.15 (s, 1H), 7.93 (t,  $J = 7.3$  Hz, 2H), 7.59 (t,  $J = 7.7$  Hz, 1H), 7.49 (s, 1H).  $^{13}\text{C}$  NMR (126 MHz, DMSO- $d_6$ )  $\delta$  169.37, 168.04, 153.38, 149.72, 136.46, 135.62, 132.02, 131.90, 129.74, 129.65, 127.80, 125.89, 124.15, 74.50.

HRMS (ESI):  $m/z$   $[M+H]^+$  calcd for  $C_{14}H_{10}N_3OCl$ :272.0585; found:272.0580.

*General procedure for synthesis of compounds 12-40*

Compound **a2** (3 g, 15.23 mmol) was dissolved in THF (60 mL), then NaOH (1.22 g, 30.46 mmol) and H<sub>2</sub>O (6 mL) were added into the solution. Then, the mixture was stirred at 30°C for 10 min. *p*-toluenesulfonyl chloride under was added under ice bath. Then, the mixture was stirred at 30 °C for 6 h. The reaction was concentrated to obtain yellow oil, then EA was added and the mixture was washed with saturated brine solution, dried over anhydrous Na<sub>2</sub>SO<sub>4</sub>, then purified by column chromatography (gradient elution of PE/EA 85/15, v/v) to obtain compound **M1**.

Compound **M2** was obtained according to the similar procedures with compound **1**. Compound **M2** (2 g, 5.71 mmol) was dissolved in DMF (60 mL), then NIS (1.67 g, 7.41 mmol) was added into the solution under ice bath. Then, the mixture was stirred at 65 °C for 12 h. After the reaction was completed, the reaction was quenched with aqueous sodium thiosulfate solution, then extracted with EA (200 mL×2). The combined organic layer was washed with saturated brine solution, dried over anhydrous Na<sub>2</sub>SO<sub>4</sub>, then purified by column chromatography (gradient elution of PE/EA 30/70, v/v) to obtain compound **M3**.

Compounds **M4-M32** were obtained according to the similar procedures with compound **1**. Compound **M4** (200 mg), NaOH (60 mg) and H<sub>2</sub>O (2 mL) and CH<sub>3</sub>CH<sub>2</sub>OH (20 mL) were added into flask. Then, the mixture was stirred at 75 °C for 2 h. The reaction was concentrated, then EA was added and the mixture was washed with saturated brine solution, dried over anhydrous Na<sub>2</sub>SO<sub>4</sub>, then purified by column chromatography (gradient elution of PE/EA 10/90, v/v) to obtain compound **12**.

*3-(3-(furan-3-yl)-1H-pyrrolo[2,3-b]pyridin-5-yl)benzamide (12)*

<sup>1</sup>H NMR (400 MHz, DMSO-*d*<sub>6</sub>)  $\delta$  11.91 (s, 1H), 8.64 (d,  $J$  = 2.0 Hz, 1H), 8.47 (d,  $J$  = 1.9 Hz, 1H), 8.38 (s, 1H), 8.26 (s, 1H), 8.16 (s, 1H), 7.98 (d,  $J$  = 7.8 Hz, 1H), 7.90 – 7.85 (m, 2H), 7.75 (t,  $J$  = 1.6 Hz, 1H), 7.59 (t,  $J$  = 7.7 Hz, 1H), 7.49 (s, 1H), 7.02 (d,  $J$  = 1.0 Hz, 1H). <sup>13</sup>C NMR (101 MHz, DMSO-*d*<sub>6</sub>)  $\delta$  168.35, 148.97, 143.80, 142.53, 139.33, 138.25, 135.42, 130.44, 129.42, 128.45, 126.69, 126.37 (2C), 124.80, 119.74, 117.62, 109.81, 107.05. HRMS (ESI):  $m/z$   $[M+H]^+$  calcd for  $C_{18}H_{13}N_3O_2$ :239.0927;

Compounds **13-40** were obtained according to the similar procedures with compound **12**.

found:304.1084. *3-(3-(thiophen-3-yl)-1H-pyrrolo[2,3-b]pyridin-5-yl)benzamide (13)*

<sup>1</sup>H NMR (400 MHz, DMSO-*d*<sub>6</sub>) δ 11.98 (s, 1H), 8.62 (d, *J* = 22.3 Hz, 2H), 8.22 (d, *J* = 36.9 Hz, 2H), 7.97 (t, *J* = 10.3 Hz, 3H), 7.88 (d, *J* = 7.5 Hz, 1H), 7.65 (s, 2H), 7.59 (t, *J* = 7.6 Hz, 1H), 7.50 (s, 1H). <sup>13</sup>C NMR (101 MHz, DMSO-*d*<sub>6</sub>) δ 168.31, 148.98, 142.59, 139.41, 135.70, 135.42, 130.43, 129.44, 128.66, 127.26, 126.71, 126.61, 126.38, 126.27, 125.24, 118.71, 117.69, 111.16. HRMS (ESI): *m/z* [M+H]<sup>+</sup> calcd for C<sub>18</sub>H<sub>13</sub>N<sub>3</sub>OS: 320.0852; found:320.0853.

*3-(3-(thiophen-2-yl)-1H-pyrrolo[2,3-b]pyridin-5-yl)benzamide (14)*

<sup>1</sup>H NMR (500 MHz, DMSO-*d*<sub>6</sub>) δ 12.10 (s, 1H), 8.68 (d, *J* = 1.7 Hz, 1H), 8.54 (d, *J* = 1.5 Hz, 1H), 8.27 (s, 1H), 8.17 (s, 1H), 7.96 (d, *J* = 7.7 Hz, 1H), 7.91 (d, *J* = 7.6 Hz, 2H), 7.71 (s, 1H), 7.60 (t, *J* = 7.7 Hz, 1H), 7.48 (s, 1H), 6.88 (d, *J* = 3.1 Hz, 1H), 6.61 (d, *J* = 1.7 Hz, 1H). <sup>13</sup>C NMR (126 MHz, DMSO-*d*<sub>6</sub>) δ 168.32, 150.02, 148.69, 143.04, 141.25, 139.24, 135.50, 130.37, 129.49, 128.92, 126.80, 126.40, 126.36, 123.94, 116.52, 112.00, 106.89, 104.14. HRMS (ESI): *m/z* [M+H]<sup>+</sup> calcd for C<sub>18</sub>H<sub>13</sub>N<sub>3</sub>OS:320.0852; found: 320.0855.

*3-(3-(1H-pyrazol-4-yl)-1H-pyrrolo[2,3-b]pyridin-5-yl)benzamide (15)*

<sup>1</sup>H NMR (500 MHz, DMSO-*d*<sub>6</sub>) δ 13.52 (s, 1H), 8.63 (d, *J* = 2.1 Hz, 1H), 8.45 (d, *J* = 8.4 Hz, 1H), 8.29 (d, *J* = 2.0 Hz, 1H), 8.12 (s, 1H), 8.09 (s, 1H), 8.06 – 7.95 (m, 1H), 7.82 (d, *J* = 7.7 Hz, 2H), 7.53 (t, *J* = 7.7 Hz, 1H), 7.41 (s, 3H). <sup>13</sup>C NMR (126 MHz, DMSO-*d*<sub>6</sub>) δ 189.51, 168.24, 158.82, 151.64, 141.24, 138.65, 137.65, 135.41, 133.27, 129.45, 129.03, 126.50, 125.08, 123.81, 122.29, 122.12, 114.10. HRMS (ESI): *m/z* [M+H]<sup>+</sup> calcd for C<sub>17</sub>H<sub>13</sub>N<sub>5</sub>O:304.1193; found: 304.1169

*3-(3-(1-methyl-1H-pyrazol-4-yl)-1H-pyrrolo[2,3-b]pyridin-5-yl)benzamide (16)*

<sup>1</sup>H NMR (400 MHz, DMSO-*d*<sub>6</sub>) δ 11.83 (s, 1H), 8.62 (d, *J* = 1.9 Hz, 1H), 8.45 (d, *J* = 1.7 Hz, 1H), 8.27 (d, *J* = 3.4 Hz, 2H), 8.20 (s, 1H), 7.96 (d, *J* = 7.8 Hz, 1H), 7.92 (s, 1H), 7.89 (d, *J* = 7.7 Hz, 1H), 7.77 (d, *J* = 2.3 Hz, 1H), 7.59 (t, *J* = 7.7 Hz, 1H), 7.51 (s, 1H), 3.91 (s, 3H). <sup>13</sup>C NMR (101 MHz, DMSO-*d*<sub>6</sub>) δ 168.35, 148.81, 142.40, 139.52, 136.65, 135.41, 130.41, 129.41, 128.29, 127.56, 126.63, 126.40, 125.99,

123.26, 117.85, 115.62, 107.36, 60.23. HRMS (ESI):  $m/z$   $[M+H]^+$  calcd for  $C_{18}H_{15}N_5O$ :318.1349; found:318.1346.

*3-(3-(1-(1-ethoxyethyl)-1H-pyrazol-4-yl)-1H-pyrrolo[2,3-b]pyridin-5-yl)benzamide*

**(17)**

$^1H$  NMR (500 MHz, DMSO- $d_6$ )  $\delta$  11.82 (s, 1H), 8.62 (d,  $J = 1.6$  Hz, 1H), 8.49 (s, 1H), 8.44 (s, 1H), 8.26 (s, 1H), 8.14 (s, 1H), 8.02 (s, 1H), 7.97 (d,  $J = 7.7$  Hz, 1H), 7.89 (d,  $J = 7.7$  Hz, 1H), 7.83 (d,  $J = 2.2$  Hz, 1H), 7.59 (t,  $J = 7.7$  Hz, 1H), 7.45 (s, 1H), 5.60 (t,  $J = 6.0$  Hz, 1H), 3.47 (dq,  $J = 14.1, 7.0$  Hz, 1H), 3.28 (dq,  $J = 14.2, 7.1$  Hz, 1H), 1.68 (d,  $J = 6.0$  Hz, 3H), 1.07 (t,  $J = 7.0$  Hz, 3H).  $^{13}C$  NMR (126 MHz, DMSO- $d_6$ )  $\delta$  168.35, 148.85, 142.48, 139.55, 136.98, 135.43, 130.48, 129.39, 128.39, 126.62, 126.48, 126.10, 124.52, 123.66, 117.77, 116.24, 107.19, 86.75, 63.42, 21.70, 15.25. HRMS (ESI):  $m/z$   $[M+H]^+$  calcd for  $C_{21}H_{21}N_5O_2$ :376.1768; found: 376.1771.

*3-(3-(1-(difluoromethyl)-1H-pyrazol-4-yl)-1H-pyrrolo[2,3-b]pyridin-5-yl)benzamide*

**(18)**

$^1H$  NMR (500 MHz, DMSO- $d_6$ )  $\delta$  11.96 (s, 1H), 8.81 (s, 1H), 8.65 (d,  $J = 1.5$  Hz, 1H), 8.54 (s, 1H), 8.35 (s, 1H), 8.27 (s, 1H), 8.13 (s, 1H), 8.00-7.97 (m, 2.25H), 7.89 (d,  $J = 7.7$  Hz, 14H), 7.84 (d,  $J = 10.4$  Hz, 0.5H), 7.73 (s, 0.25H), 7.60 (t,  $J = 7.7$  Hz, 1H), 7.46 (s, 1H).  $^{13}C$  NMR (126 MHz, DMSO- $d_6$ )  $\delta$  168.35, 148.86, 142.74, 140.90, 139.41, 135.43, 130.53, 129.37, 128.70, 126.68, 126.52, 126.12, 124.85, 124.43, 118.51, 117.61, 113.13, 111.16, 109.20, 105.63. HRMS (ESI):  $m/z$   $[M+H]^+$  calcd for  $C_{18}H_{13}N_5OF_2$ :354.1161; found: 354.1136.

*3-(3-phenyl-1H-pyrrolo[2,3-b]pyridin-5-yl)benzamide* **(19)**

$^1H$  NMR (400 MHz, DMSO- $d_6$ )  $\delta$  12.08 (s, 1H), 8.65 (d,  $J = 1.5$  Hz, 1H), 8.53 (s, 1H), 8.26 (s, 1H), 8.18 (s, 1H), 7.95 (d,  $J = 6.4$  Hz, 2H), 7.89 (d,  $J = 7.7$  Hz, 1H), 7.81 (d,  $J = 7.5$  Hz, 2H), 7.58 (t,  $J = 7.7$  Hz, 1H), 7.47 (t,  $J = 7.5$  Hz, 3H), 7.28 (t,  $J = 7.3$  Hz, 1H).  $^{13}C$  NMR (101 MHz, DMSO- $d_6$ )  $\delta$  168.29, 149.24, 142.61, 139.49, 135.42, 135.37, 130.39, 129.48, 129.42 (2C), 128.75, 126.95 (2C), 126.72, 126.38, 126.25, 126.09, 125.24, 117.78, 115.26. HRMS (ESI):  $m/z$   $[M+H]^+$  calcd for  $C_{20}H_{15}N_3O$ :314.1288; found:314.1286.

*3-(3-(2-fluorophenyl)-1H-pyrrolo[2,3-b]pyridin-5-yl)benzamide* **(20)**

<sup>1</sup>H NMR (500 MHz, DMSO-*d*<sub>6</sub>) δ 12.19 (s, 1H), 8.68 (d, *J* = 1.8 Hz, 1H), 8.35 (s, 1H), 8.23 (s, 1H), 8.14 (s, 1H), 7.87 (ddd, *J* = 24.7, 14.3, 7.5 Hz, 4H), 7.58 (t, *J* = 7.7 Hz, 1H), 7.41 (d, *J* = 39.8 Hz, 2H), 7.34 (dd, *J* = 16.0, 8.7 Hz, 2H). <sup>13</sup>C NMR (126 MHz, DMSO-*d*<sub>6</sub>) δ 168.27, 160.49, 158.54, 148.77, 142.76, 139.41, 135.47, 130.59, 130.55, 130.32, 129.50, 128.78, 128.50, 128.33, 128.27, 127.21, 127.17, 126.73, 126.45, 126.42, 126.36, 125.99, 125.39, 125.37, 122.70, 122.58, 118.30, 116.58, 116.40, 108.94. HRMS (ESI): *m/z* [M+H]<sup>+</sup> calcd for C<sub>20</sub>H<sub>14</sub>N<sub>3</sub>OF:332.1194; found: 332.1196.

*3-(3-(2-chlorophenyl)-1H-pyrrolo[2,3-b]pyridin-5-yl)benzamide* (**21**)

<sup>1</sup>H NMR (500 MHz, DMSO-*d*<sub>6</sub>) δ 12.17 (s, 3H), 8.66 (d, *J* = 1.8 Hz, 3H), 8.52 (d, *J* = 1.8 Hz, 3H), 8.26 (s, 3H), 8.15 (s, 4H), 8.07 (s, 2H), 7.95 (d, *J* = 7.7 Hz, 3H), 7.89 (d, *J* = 7.7 Hz, 3H), 7.86 – 7.79 (m, 6H), 7.59 (t, *J* = 7.7 Hz, 3H), 7.49 (dd, *J* = 16.2, 8.1 Hz, 6H), 7.32 (d, *J* = 7.8 Hz, 3H). <sup>13</sup>C NMR (126 MHz, DMSO-*d*<sub>6</sub>) δ 168.25, 149.21, 142.84, 139.41, 137.64, 135.42, 134.16, 131.23, 130.47, 129.48, 129.02, 126.76, 126.46, 126.27(2C), 126.08, 125.98, 125.48, 117.55, 113.79. HRMS (ESI): *m/z* [M+H]<sup>+</sup> calcd for C<sub>20</sub>H<sub>14</sub>N<sub>3</sub>OCl:348.0898; found: 348.0898.

*3-(3-(2-hydroxyphenyl)-1H-pyrrolo[2,3-b]pyridin-5-yl)benzamide* (**22**)

<sup>1</sup>H NMR (500 MHz, DMSO-*d*<sub>6</sub>) δ 10.13 (s, 1H), 8.67 (d, *J* = 2.4 Hz, 1H), 8.08 (s, 1H), 8.02 (s, 1H), 7.84 (dd, *J* = 16.4, 5.0 Hz, 4H), 7.60 (d, *J* = 7.7 Hz, 1H), 7.52 (t, *J* = 7.7 Hz, 1H), 7.48 – 7.38 (m, 2H), 7.38 – 7.32 (m, 1H), 6.99 (dd, *J* = 12.8, 7.8 Hz, 2H). <sup>13</sup>C NMR (126 MHz, DMSO-*d*<sub>6</sub>) δ 198.13, 168.16, 158.88, 155.36, 152.85, 141.07, 137.61, 135.53, 132.53, 129.85, 129.54, 128.67, 127.10, 126.42, 124.98, 123.69, 119.69, 116.80, 112.68. HRMS (ESI): *m/z* [M+H]<sup>+</sup> calcd for C<sub>20</sub>H<sub>15</sub>N<sub>3</sub>O<sub>2</sub>:330.1237; found: 330.3334.

*3-(3-(*o*-tolyl)-1H-pyrrolo[2,3-b]pyridin-5-yl)benzamide* (**23**)

<sup>1</sup>H NMR (500 MHz, DMSO-*d*<sub>6</sub>) δ 11.99 (s, 1H), 8.65 (d, *J* = 1.9 Hz, 1H), 8.18 (s, 1H), 8.12 (s, 1H), 8.08 (d, *J* = 1.6 Hz, 1H), 7.92 – 7.82 (m, 2H), 7.65 (d, *J* = 2.1 Hz, 1H), 7.54 (t, *J* = 7.7 Hz, 1H), 7.48 – 7.43 (m, 1H), 7.41 (s, 1H), 7.36 (d, *J* = 7.0 Hz, 1H), 7.32 – 7.21 (m, 2H), 2.35 (s, 3H). <sup>13</sup>C NMR (126 MHz, DMSO-*d*<sub>6</sub>) δ 168.28, 148.63, 142.45, 139.44, 136.34, 135.46, 134.17, 131.01, 130.75, 130.20, 129.46, 128.44, 127.08, 126.64, 126.40, 126.32, 126.23, 125.77, 119.21, 114.71, 21.05. HRMS (ESI):



$m/z$   $[M+H]^+$  calcd for  $C_{21}H_{17}N_3O$ :328.1444; found: 328.1449.

*3-(3-(2-ethylphenyl)-1H-pyrrolo[2,3-b]pyridin-5-yl)benzamide (24)*

$^1H$  NMR (500 MHz,  $DMSO-d_6$ )  $\delta$  11.97 (s, 1H), 8.65 (s, 1H), 8.17 (s, 1H), 8.12 (s, 1H), 8.01 (s, 1H), 7.85 (d,  $J = 7.7$  Hz, 2H), 7.57 (d,  $J = 21.5$  Hz, 1H), 7.53 (d,  $J = 7.7$  Hz, 1H), 7.48 – 7.35 (m, 3H), 7.31 (dt,  $J = 19.4, 7.1$  Hz, 2H), 2.68 (q,  $J = 7.4$  Hz, 2H), 1.07 (t,  $J = 7.5$  Hz, 3H).  $^{13}C$  NMR (126 MHz,  $DMSO-d_6$ )  $\delta$  168.28, 148.58, 142.81, 142.46, 139.39, 135.47, 133.51, 131.33, 130.15, 129.46, 129.10, 128.40, 127.56, 126.63, 126.29, 126.20, 125.84, 125.48, 119.57, 114.67, 26.39, 15.98. HRMS (ESI):  $m/z$   $[M+H]^+$  calcd for  $C_{22}H_{19}N_3O$ :342.1601; found: 342.1606.

*3-(3-(2-methoxyphenyl)-1H-pyrrolo[2,3-b]pyridin-5-yl)benzamide (25)*

$^1H$  NMR (500 MHz,  $DMSO-d_6$ )  $\delta$  11.95 (s, 1H), 8.62 (d,  $J = 1.5$  Hz, 1H), 8.26 (s, 1H), 8.21 (s, 1H), 8.13 (s, 1H), 7.88 (t,  $J = 8.5$  Hz, 2H), 7.76 (d,  $J = 2.2$  Hz, 1H), 7.62 (d,  $J = 7.4$  Hz, 1H), 7.57 (t,  $J = 7.7$  Hz, 1H), 7.42 (s, 1H), 7.31 (t,  $J = 7.8$  Hz, 1H), 7.15 (d,  $J = 8.2$  Hz, 1H), 7.07 (t,  $J = 7.4$  Hz, 1H), 3.84 (s, 3H).  $^{13}C$  NMR (126 MHz,  $DMSO-d_6$ )  $\delta$  168.31, 156.70, 148.70, 142.21, 139.65, 135.48, 130.19, 130.18, 129.49, 128.29, 127.89, 126.84, 126.59, 126.31, 123.77, 121.24, 118.93, 112.13, 111.71, 55.78. HRMS (ESI):  $m/z$   $[M+H]^+$  calcd for  $C_{21}H_{17}N_3O_2$ :344.1394; found: 344.1394.

*3-(3-(2-isopropylphenyl)-1H-pyrrolo[2,3-b]pyridin-5-yl)benzamide (26)*

$^1H$  NMR (500 MHz,  $DMSO-d_6$ )  $\delta$  11.96 (s, 1H), 8.66 (d,  $J = 1.6$  Hz, 1H), 8.16 (s, 1H), 8.11 (s, 1H), 7.98 (s, 1H), 7.89 – 7.79 (m, 2H), 7.59 – 7.50 (m, 2H), 7.48 (d,  $J = 7.8$  Hz, 1H), 7.42 – 7.32 (m, 3H), 7.27 (t,  $J = 7.4$  Hz, 1H), 3.18 (dq,  $J = 13.4, 6.6$  Hz, 1H), 1.15 (d,  $J = 6.8$  Hz, 6H).  $^{13}C$  NMR (126 MHz,  $DMSO-d_6$ )  $\delta$  168.30, 148.53, 147.84, 142.47, 139.35, 135.52, 132.79, 131.50, 130.06, 129.48, 128.38, 127.93, 126.61, 126.18, 126.09, 126.04, 125.82, 125.23, 119.94, 114.72, 29.65, 24.63(2C). HRMS (ESI):  $m/z$   $[M+H]^+$  calcd for  $C_{23}H_{21}N_3O$ :356.1757; found: 356.1761.

*3-(3-(2-(trifluoromethyl)phenyl)-1H-pyrrolo[2,3-b]pyridin-5-yl)benzamide (27)*

$^1H$  NMR (500 MHz,  $DMSO-d_6$ )  $\delta$  12.10 (s, 1H), 8.68 (s, 1H), 8.16 (s, 1H), 8.11 (s, 1H), 8.04 (s, 1H), 7.89 (d,  $J = 7.9$  Hz, 1H), 7.86 (d,  $J = 7.7$  Hz, 2H), 7.76 (d,  $J = 7.5$  Hz, 1H), 7.67 (d,  $J = 7.6$  Hz, 1H), 7.64 – 7.57 (m, 2H), 7.54 (t,  $J = 7.7$  Hz, 1H), 7.41 (s, 1H).  $^{13}C$  NMR (126 MHz,  $DMSO-d_6$ )  $\delta$  168.26, 148.29, 142.77, 139.25, 135.47,

133.85, 133.56, 132.89, 130.19, 129.45, 128.71, 128.48, 128.25, 127.96, 126.90, 126.86, 126.69, 126.43, 126.23, 125.92, 125.33, 123.75, 119.81, 112.22. HRMS (ESI):  $m/z$   $[M+H]^+$  calcd for  $C_{21}H_{14}N_3OF_3$ :382.1162; found: 382.1168.

*3-(3-(2-(trifluoromethoxy)phenyl)-1H-pyrrolo[2,3-b]pyridin-5-yl)benzamide (28)*

$^1H$  NMR (500 MHz, DMSO- $d_6$ )  $\delta$  12.19 (s, 1H), 8.68 (s, 1H), 8.29 (s, 1H), 8.22 (s, 1H), 8.13 (s, 1H), 7.89 (t,  $J = 7.5$  Hz, 2H), 7.86 – 7.80 (m, 2H), 7.58 (t,  $J = 7.7$  Hz, 1H), 7.55 – 7.50 (m, 2H), 7.46 (dd,  $J = 15.9, 7.1$  Hz, 2H).  $^{13}C$  NMR (126 MHz, DMSO- $d_6$ )  $\delta$  168.26, 148.71, 145.88, 142.79, 139.37, 135.50, 131.75, 130.23, 129.50, 128.79, 128.57, 128.47, 128.37, 127.18, 126.72, 126.32, 126.30, 122.15, 121.60, 119.56, 118.35, 109.87. HRMS (ESI):  $m/z$   $[M+H]^+$  calcd for  $C_{21}H_{14}N_3O_2F_3$ :398.1111; found: 398.1113.

*3-(3-(3-fluorophenyl)-1H-pyrrolo[2,3-b]pyridin-5-yl)benzamide (29)*

$^1H$  NMR (500 MHz, DMSO- $d_6$ )  $\delta$  12.15 (s, 1H), 8.66 (d,  $J = 1.7$  Hz, 1H), 8.55 (d,  $J = 1.7$  Hz, 1H), 8.26 (s, 1H), 8.15 (s, 1H), 8.05 (s, 1H), 7.97 (d,  $J = 7.7$  Hz, 1H), 7.90 (d,  $J = 7.7$  Hz, 1H), 7.70 (d,  $J = 7.8$  Hz, 1H), 7.68 – 7.56 (m, 2H), 7.56 – 7.38 (m, 2H), 7.14 – 7.04 (m, 1H).  $^{13}C$  NMR (126 MHz, DMSO- $d_6$ )  $\delta$  168.28, 164.24, 162.31, 149.23, 142.80, 139.41, 137.93, 137.86, 135.44, 131.31, 131.24, 130.46, 129.46, 129.00, 126.76, 126.45, 126.18, 126.14, 122.88, 117.57, 114.10, 114.08, 113.33, 113.15, 112.90, 112.73. HRMS (ESI):  $m/z$   $[M+H]^+$  calcd for  $C_{20}H_{14}N_3OF$ :332.1194; found: 332.1195.

*3-(3-(3-chlorophenyl)-1H-pyrrolo[2,3-b]pyridin-5-yl)benzamide (30)*

$^1H$  NMR (500 MHz, DMSO- $d_6$ )  $\delta$  12.17 (s, 1H), 8.66 (d,  $J = 1.8$  Hz, 1H), 8.52 (d,  $J = 1.8$  Hz, 1H), 8.26 (s, 1H), 8.16 (s, 1H), 8.07 (s, 1H), 7.96 (d,  $J = 7.7$  Hz, 1H), 7.90 (d,  $J = 7.7$  Hz, 1H), 7.83 (d,  $J = 6.8$  Hz, 2H), 7.59 (t,  $J = 7.7$  Hz, 1H), 7.49 (dd,  $J = 17.5, 9.4$  Hz, 2H), 7.32 (d,  $J = 7.8$  Hz, 1H).  $^{13}C$  NMR (126 MHz, DMSO- $d_6$ )  $\delta$  168.27, 149.22, 142.84, 139.42, 137.64, 135.44, 134.17, 131.23, 130.46, 129.48, 129.03, 126.76, 126.47, 126.28, 126.25, 126.07, 125.98, 125.48, 117.56, 113.80. HRMS (ESI):  $m/z$   $[M+H]^+$  calcd for  $C_{20}H_{14}N_3OCl$ :348.0898; found: 348.0896.

*3-(3-(3-hydroxyphenyl)-1H-pyrrolo[2,3-b]pyridin-5-yl)benzamide (31)*

$^1H$  NMR (500 MHz, DMSO- $d_6$ )  $\delta$  12.01 (s, 1H), 9.41 (s, 1H), 8.64 (d,  $J = 1.9$  Hz, 1H),

8.47 (d,  $J = 1.7$  Hz, 1H), 8.24 (s, 1H), 8.16 (s, 1H), 7.96 – 7.84 (m, 3H), 7.59 (t,  $J = 7.7$  Hz, 1H), 7.45 (s, 1H), 7.32 – 7.17 (m, 3H), 6.69 (dd,  $J = 7.8, 1.1$  Hz, 1H).  $^{13}\text{C}$  NMR (126 MHz, DMSO- $d_6$ )  $\delta$  170.80, 168.26, 158.26, 149.23, 142.56, 139.57, 136.54, 135.47, 130.40, 130.34, 129.50, 128.72, 126.70, 126.39, 126.06, 125.07, 117.81, 115.38, 113.71, 113.38. HRMS (ESI):  $m/z$   $[\text{M}+\text{H}]^+$  calcd for  $\text{C}_{20}\text{H}_{15}\text{N}_3\text{O}_2$ :330.1237; found: 330.1238.

*3-(3-(3-methoxyphenyl)-1H-pyrrolo[2,3-b]pyridin-5-yl)benzamide (32)*

$^1\text{H}$  NMR (500 MHz, DMSO- $d_6$ )  $\delta$  12.05 (s, 1H), 8.65 (d,  $J = 1.5$  Hz, 1H), 8.50 (s, 1H), 8.25 (s, 1H), 8.15 (s, 1H), 8.00 – 7.83 (m, 3H), 7.58 (t,  $J = 7.7$  Hz, 1H), 7.44 (s, 1H), 7.39 (d,  $J = 5.9$  Hz, 2H), 7.31 (s, 1H), 6.93 – 6.81 (m, 1H), 3.84 (s, 3H).  $^{13}\text{C}$  NMR (126 MHz, DMSO- $d_6$ )  $\delta$  168.28, 160.26, 149.24, 142.62, 139.50, 136.74, 135.46, 130.46, 130.34, 129.49, 128.76, 126.71, 126.38, 126.06, 125.50, 119.44, 117.83, 115.22, 112.45, 111.89, 55.53. HRMS (ESI):  $m/z$   $[\text{M}+\text{H}]^+$  calcd for  $\text{C}_{21}\text{H}_{17}\text{N}_3\text{O}_2$ :344.1394; found: 344.1392.

*3-(3-(3-(trifluoromethyl)phenyl)-1H-pyrrolo[2,3-b]pyridin-5-yl)benzamide (33)*

$^1\text{H}$  NMR (500 MHz, DMSO- $d_6$ )  $\delta$  12.22 (s, 1H), 8.67 (d,  $J = 1.7$  Hz, 1H), 8.53 (d,  $J = 1.8$  Hz, 1H), 8.26 (s, 1H), 8.23 – 8.04 (m, 4H), 7.93 (dd,  $J = 25.6, 7.7$  Hz, 2H), 7.72 (t,  $J = 7.8$  Hz, 1H), 7.60 (dd,  $J = 14.8, 7.3$  Hz, 2H), 7.45 (s, 1H).  $^{13}\text{C}$  NMR (126 MHz, DMSO- $d_6$ )  $\delta$  168.25, 149.25, 142.92, 139.41, 136.54, 135.46, 130.78, 130.50, 130.42, 130.16, 129.49, 129.10, 126.77, 126.48, 125.98, 125.92, 123.76, 123.07, 123.04, 122.60, 122.57, 117.57, 113.75. HRMS (ESI):  $m/z$   $[\text{M}+\text{H}]^+$  calcd for  $\text{C}_{21}\text{H}_{14}\text{N}_3\text{OF}_3$ :382.1162; found: 382.1157.

*3-(3-(3-(trifluoromethoxy)phenyl)-1H-pyrrolo[2,3-b]pyridin-5-yl)benzamide (34)*

$^1\text{H}$  NMR (500 MHz, DMSO- $d_6$ )  $\delta$  12.20 (s, 1H), 8.67 (d,  $J = 1.8$  Hz, 1H), 8.53 (d,  $J = 1.8$  Hz, 1H), 8.26 (s, 1H), 8.12 (d,  $J = 20.6$  Hz, 2H), 7.95 (d,  $J = 7.7$  Hz, 1H), 7.90 (d,  $J = 7.8$  Hz, 2H), 7.75 (s, 1H), 7.60 (td,  $J = 7.8, 5.3$  Hz, 2H), 7.45 (s, 1H), 7.26 (d,  $J = 8.1$  Hz, 1H).  $^{13}\text{C}$  NMR (126 MHz, DMSO- $d_6$ )  $\delta$  168.25, 149.54, 149.24, 142.89, 139.40, 137.83, 135.45, 131.31, 130.42, 129.48, 129.07, 126.77, 126.47, 126.39, 126.03, 125.88, 121.70, 119.67, 119.12, 118.33, 117.53, 113.70. HRMS (ESI):  $m/z$   $[\text{M}+\text{H}]^+$  calcd for  $\text{C}_{21}\text{H}_{14}\text{N}_3\text{O}_2\text{F}_3$ :330.1237; found: 330.1238.

*3-(3-(4-fluorophenyl)-1H-pyrrolo[2,3-b]pyridin-5-yl)benzamide (35)*

<sup>1</sup>H NMR (400 MHz, DMSO-*d*<sub>6</sub>) δ 12.11 (s, 1H), 8.66 (d, *J* = 1.7 Hz, 1H), 8.50 (d, *J* = 1.5 Hz, 1H), 8.23 (d, *J* = 24.2 Hz, 2H), 7.88 (ddd, *J* = 15.1, 14.0, 6.7 Hz, 5H), 7.57 (dd, *J* = 22.0, 14.3 Hz, 2H), 7.30 (t, *J* = 8.8 Hz, 2H). <sup>13</sup>C NMR (101 MHz, DMSO-*d*<sub>6</sub>) δ 168.29, 162.32, 159.91, 149.14, 142.66, 139.46, 135.40, 131.83, 130.41, 129.47, 128.77, 128.70, 126.73, 126.40, 125.98, 125.23, 117.68, 116.28, 116.07, 114.27. HRMS (ESI): *m/z* [M+H]<sup>+</sup> calcd for C<sub>20</sub>H<sub>14</sub>N<sub>3</sub>OF:332.1194; found:332.1198.

*3-(3-(4-chlorophenyl)-1H-pyrrolo[2,3-b]pyridin-5-yl)benzamide (36)*

<sup>1</sup>H NMR (400 MHz, DMSO-*d*<sub>6</sub>) δ 12.17 (s, 1H), 8.66 (d, *J* = 1.4 Hz, 1H), 8.53 (s, 1H), 8.26 (s, 1H), 8.18 (s, 1H), 8.01 (d, *J* = 1.8 Hz, 1H), 7.95 (d, *J* = 7.6 Hz, 1H), 7.89 (d, *J* = 7.7 Hz, 1H), 7.85 (d, *J* = 8.4 Hz, 2H), 7.59 (t, *J* = 7.7 Hz, 1H), 7.51 (d, *J* = 8.3 Hz, 3H). <sup>13</sup>C NMR (101 MHz, DMSO-*d*<sub>6</sub>) δ 168.27, 149.21, 142.76, 139.41, 135.41, 134.30, 130.59, 130.44, 129.47, 129.32 (2C), 128.90, 128.52 (2C), 126.76, 126.42, 126.09, 125.74, 117.58, 113.97. HRMS (ESI): *m/z* [M+H]<sup>+</sup> calcd for C<sub>20</sub>H<sub>14</sub>N<sub>3</sub>OCl:348.0898; found:348.0893.

*3-(3-(4-hydroxyphenyl)-1H-pyrrolo[2,3-b]pyridin-5-yl)benzamide (37)*

<sup>1</sup>H NMR (500 MHz, DMSO-*d*<sub>6</sub>) δ 10.35 (s, 1H), 8.63 (d, *J* = 2.2 Hz, 1H), 8.06 (d, *J* = 5.3 Hz, 2H), 7.97 (d, *J* = 2.2 Hz, 1H), 7.80 (d, *J* = 7.7 Hz, 1H), 7.72 (d, *J* = 7.6 Hz, 1H), 7.63 (d, *J* = 8.6 Hz, 2H), 7.50 (t, *J* = 7.7 Hz, 1H), 7.41 (s, 1H), 7.29 (s, 2H), 6.91 (d, *J* = 8.6 Hz, 2H). <sup>13</sup>C NMR (126 MHz, DMSO-*d*<sub>6</sub>) δ 195.67, 168.18, 162.02, 159.02, 151.40, 139.36, 137.59, 135.45, 132.53, 129.70, 129.50, 128.84, 126.45, 124.99, 123.29, 115.74, 113.26. HRMS (ESI): *m/z* [M+H]<sup>+</sup> calcd for C<sub>20</sub>H<sub>15</sub>N<sub>3</sub>O<sub>2</sub>:330.1237; found: 330.1240.

*3-(3-(4-methoxyphenyl)-1H-pyrrolo[2,3-b]pyridin-5-yl)benzamide (38)*

<sup>1</sup>H NMR (500 MHz, DMSO-*d*<sub>6</sub>) δ 11.93 (s, 1H), 8.64 (s, 1H), 8.47 (s, 1H), 8.25 (s, 1H), 8.15 (s, 1H), 7.91 (dd, *J* = 23.5, 7.7 Hz, 2H), 7.81 (d, *J* = 1.8 Hz, 1H), 7.72 (d, *J* = 8.6 Hz, 2H), 7.58 (t, *J* = 7.7 Hz, 1H), 7.45 (s, 1H), 7.05 (d, *J* = 8.5 Hz, 2H), 3.81 (s, 3H). <sup>13</sup>C NMR (126 MHz, DMSO-*d*<sub>6</sub>) δ 168.30, 158.13, 149.16, 142.46, 139.56, 135.45, 130.32, 129.46, 128.53, 128.18(2C), 127.84, 126.66, 126.34, 125.96, 124.27, 117.86, 115.12, 114.92(2C), 55.59. HRMS (ESI): *m/z* [M+H]<sup>+</sup> calcd for

C<sub>21</sub>H<sub>17</sub>N<sub>3</sub>O<sub>2</sub>:344.1394; found: 344.1395.

*3-(3-(4-(trifluoromethyl)phenyl)-1H-pyrrolo[2,3-b]pyridin-5-yl)benzamide (39)*

<sup>1</sup>H NMR (500 MHz, DMSO-*d*<sub>6</sub>) δ 12.26 (s, 1H), 8.69 (d, *J* = 1.6 Hz, 1H), 8.60 (s, 1H), 8.27 (s, 1H), 8.14 (s, 2H), 8.06 (d, *J* = 8.1 Hz, 2H), 7.97 (d, *J* = 7.7 Hz, 1H), 7.90 (d, *J* = 7.7 Hz, 1H), 7.79 (d, *J* = 8.2 Hz, 2H), 7.60 (t, *J* = 7.7 Hz, 1H), 7.46 (s, 1H). <sup>13</sup>C NMR (126 MHz, DMSO-*d*<sub>6</sub>) δ 168.27, 149.33, 142.96, 139.67, 139.33, 135.47, 130.46, 129.46, 129.19, 127.17, 126.81, 126.46, 126.23, 126.19, 126.12, 123.96, 117.59, 113.77. HRMS (ESI): *m/z* [M+H]<sup>+</sup> calcd for C<sub>21</sub>H<sub>14</sub>N<sub>3</sub>OF<sub>3</sub>:382.1162; found: 382.1163.

*3-(3-(4-(trifluoromethoxy)phenyl)-1H-pyrrolo[2,3-b]pyridin-5-yl)benzamide (40)*

<sup>1</sup>H NMR (500 MHz, DMSO-*d*<sub>6</sub>) δ 12.14 (s, 1H), 8.67 (d, *J* = 1.8 Hz, 1H), 8.54 (d, *J* = 1.8 Hz, 1H), 8.26 (s, 1H), 8.14 (s, 1H), 8.01 (s, 1H), 7.99 – 7.86 (m, 4H), 7.59 (t, *J* = 7.7 Hz, 1H), 7.45 (d, *J* = 8.5 Hz, 3H). <sup>13</sup>C NMR (126 MHz, DMSO-*d*<sub>6</sub>) δ 168.27, 149.22, 146.81, 142.79, 139.40, 135.45, 134.88, 130.43, 129.45, 128.97, 128.48(2C), 126.76, 126.42, 126.04, 125.90, 122.07(2C), 121.71, 119.67, 117.61, 113.86. HRMS (ESI): *m/z* [M+H]<sup>+</sup> calcd for C<sub>21</sub>H<sub>14</sub>N<sub>3</sub>O<sub>2</sub>F<sub>3</sub>:398.1111; found: 398.1115.

## 1.2 Cell Culture

All the cell lines were purchased from the Shanghai Cell Resource Bank. SW-480, HT-29, MV4-11, Molm-13, MGC-803, MDA-MB-231, A375, A549, and GES-1 cells were cultured in RPMI-1640 with 10% FBS (*Shanghai Shuangru Biology Science & Technology Co.,Ltd*, LONSERA) and 1% penicillin-streptomycin (Beyotime). HCT-116 cells were cultured in McCoy's 5A contained 10%FBS and 1% P/S. Human Umbilical Vein Endothelial cells (HUVEC) were cultured in DMEM contained 10% FBS and 1% P/S. Cells were cultured within a humidified incubator at 37 °C in the presence of 5% CO<sub>2</sub>.

## 1.3 MTT Assay

The cell viability of the compound was assessed by CCK-8 (Biofroxx) assay. Cells were seeded in a 96-well plate at 8000 cells/well and cultured in a 37 °C and 5%

CO<sub>2</sub> atmosphere incubator for 24 h. Then, medium with compound at the concentrations of 100, 20, 4, 0.8, 0.016  $\mu$ M was added into each well for another 48 h and incubated with CCK-8 (10  $\mu$ L) for 2 h at 37 °C. The absorbance value at 450 nm was measured by the microplate reader (PerkinElmer Envision).

#### **1.4 Kinase Assay**

The kinase inhibition was detected by ADP-Glo™ Kinase Assay (Promega) using a black 384-well plate. The active CDK8 kinase was diluted in mixture (5 ng enzyme, 0.5  $\mu$ g substrate, 50  $\mu$ M DTT, 1  $\mu$ L reaction buffer and added ddH<sub>2</sub>O to 3  $\mu$ L each well) and the final ATP concentrations of was 50  $\mu$ M. After incubation at room temperature, ADP-Glo™ solution and kinase detection reagent was added. The data was collected by the microplate reader.

#### **1.5 Cellular thermal shift assay**

HCT-116 cells were cultured in cell culture dishes and treated with 5  $\mu$ M compound **12** for 4 h. HCT-116 cells were collected, washed by PBS and cell suspensions were divided into 12 PCR tubes equally. Then, 11 tubes were heated at 37, 40, 43, 46, 49, 52, 55, 58, 61, 64, and 67 °C for 4 min, respectively. After that, cells were broken by ultrasonic treatment and centrifuged at 12000 rpm for 20 min. The supernatant was analyzed by western blot.

#### **1.6 Biotin-pulldown assay**

After co-treated with 2  $\mu$ M biotinylated compound and compound **12** for 12 h, HCT-116 cells were lysed with NP-40 containing PMSF and centrifuged at 14000 r for 30 min at 4 °C. Then, 40  $\mu$ L supernatant was used as the input by adding 10  $\mu$ L 5 $\times$ SDS loading buffer, and the remains were mixed with Streptavidin Agarose (Novex, Carlsbad, CA, USA). After 6 h incubation at 4 °C, the beads were washed three times using lysis buffer and resuspended in 2 $\times$ SDS loading buffer. HEK-293T cells overexpressed flag-tagged CDK8 were treated using above method. The samples were analyzed by western blot.

### **1.7 The effect of compound on phosphorylation of STAT1 S727**

HCT-116 cells were seeded into 60 mm cultural dishes at a density of  $1.5 \times 10^6$  cells per dishes. After incubated for 12 h, cells were treated with DMSO or 10ng/mL IFN- $\gamma$ . 1 hour later, cells were treated with or without different concentrations of compound for 12 h. Cells were lysed using RIPA containing PMSF and phosphatase inhibitor cocktail A. Then cell samples were treated by western blot. Levels of total STAT1, phosphorylated STAT1 S727, Y701 and GAPDH were analyzed.

### **1.8 The effect of compound on phosphorylation of STAT5 S726**

HL-60 cells were seeded into 60 mm cultural dishes at a density of  $2 \times 10^6$  cells per dishes. After incubated for 12 h, cells were treated with or without different concentrations of compound for 12 h. Cells were lysed using RIPA containing PMSF and phosphatase inhibitor cocktail A. Then cell samples were treated by western blot. Levels of total STAT5, phosphorylated STAT5 S726 and GAPDH were analyzed.

### **Statistical Analyses**

The results were expressed as the means  $\pm$  SEMs (SPSS software), and the differences between groups were evaluated using Turkey's method (GraphPad Software). Differences between data were considered significant when the *P* value was  $<0.05$ .

3-(5H-pyrrolo[2,3-b]pyrazin-2-yl)benzamide (1)

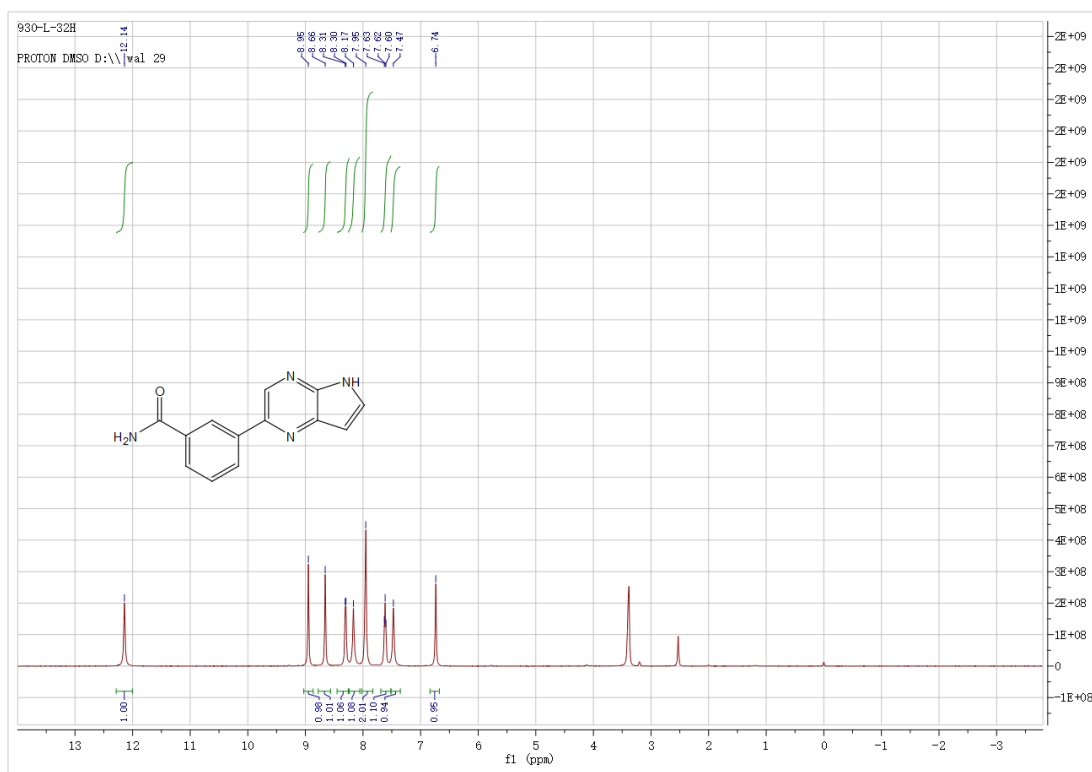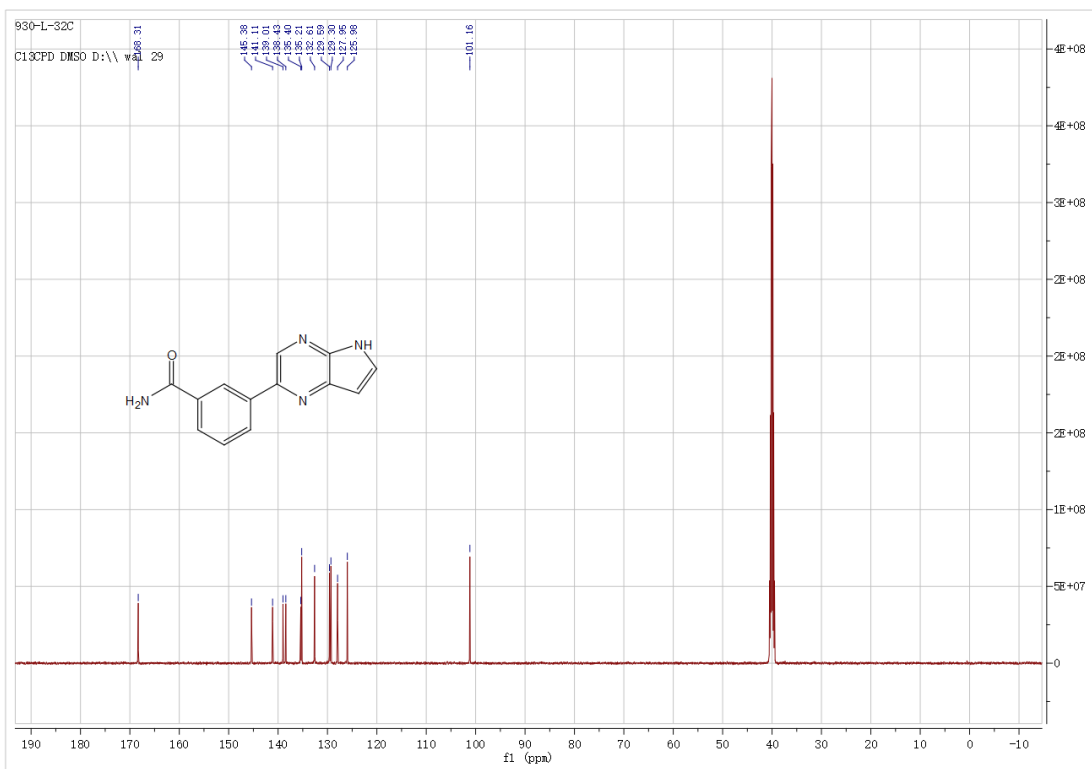



CIR-H10M40  
CALIB: 289.077  
All Ions Missed  
7/19/2021 4:40:34 PM

Sample Name ZX-0719-3  
Inj Vol 2  
Data Filename ZX-0719-3.d  
Vial 42  
Position InjPosition  
ACQ Method  
Instrument Name  
Sample Type  
Comment  
User Name  
IRM Calibration Status  
Acquired Time

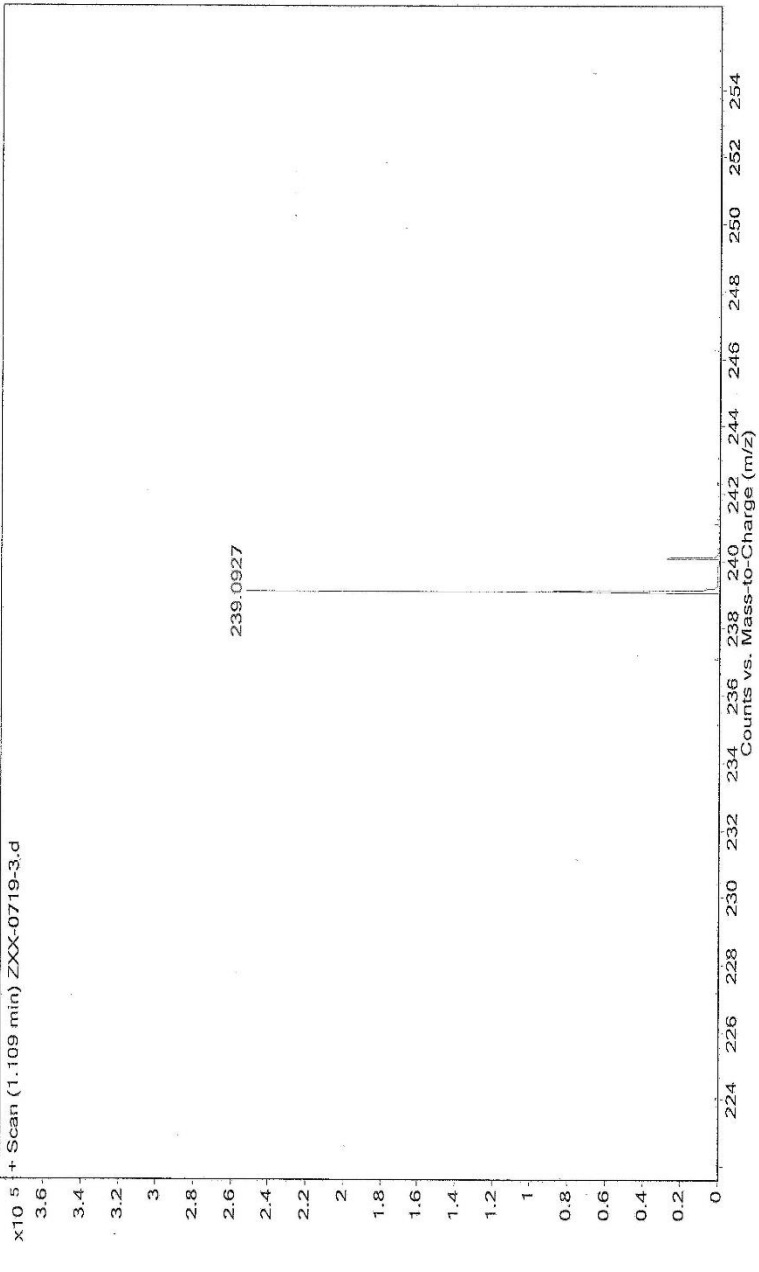

078-1

3-(1H-pyrazolo[3,4-b]pyridin-5-yl)benzamide (2)

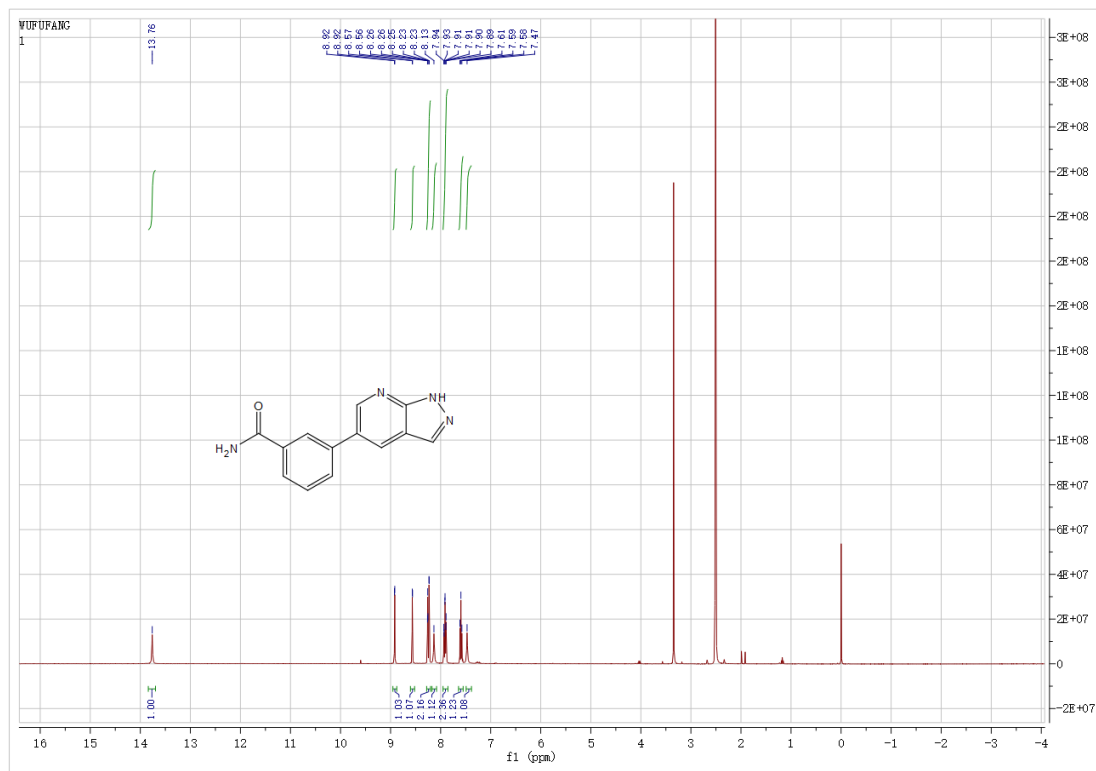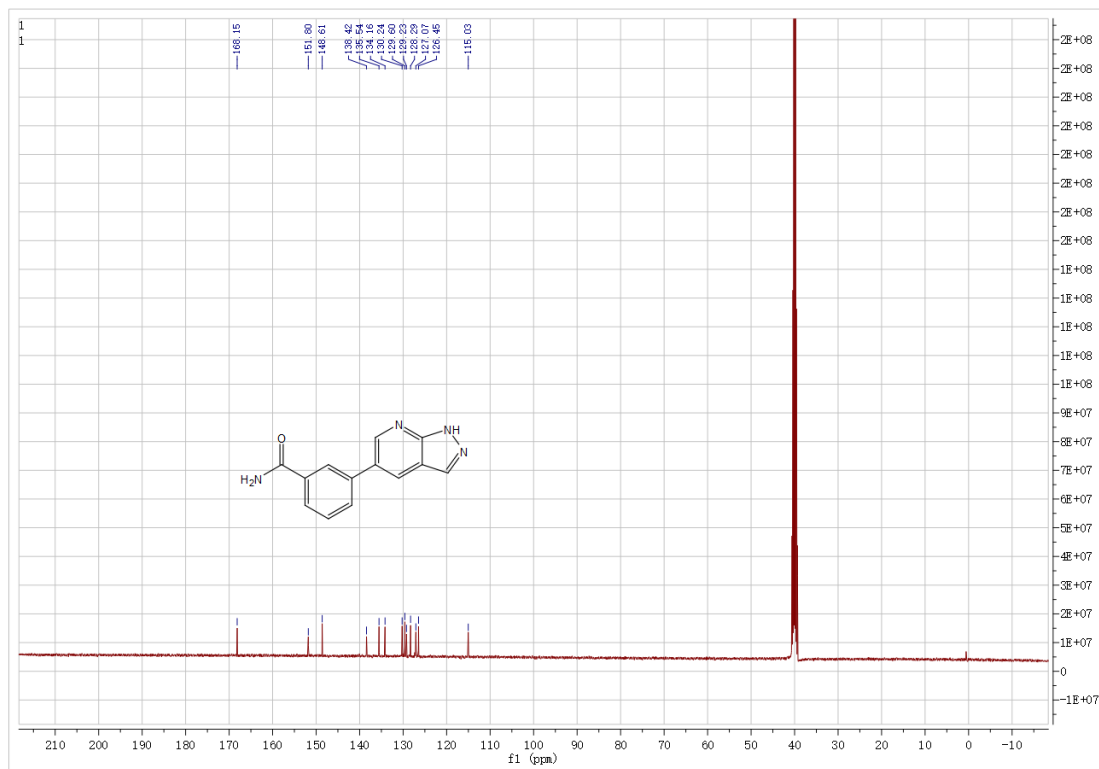

Call (714) 447-2390

Success  
3/15/2022 9:53:07 PM

User Name  
IRM Calibration Status  
Acquired Time

Instrument 1  
Sample  
Instrument Name  
Sample Type  
Comment

Vial 1  
2020LXspo.m

Position  
InjPosition  
ACQ Method

ZXX-20220315-21  
2  
ZXX-20220315-21.d

Sample Name  
Inj Vol  
Data Filename

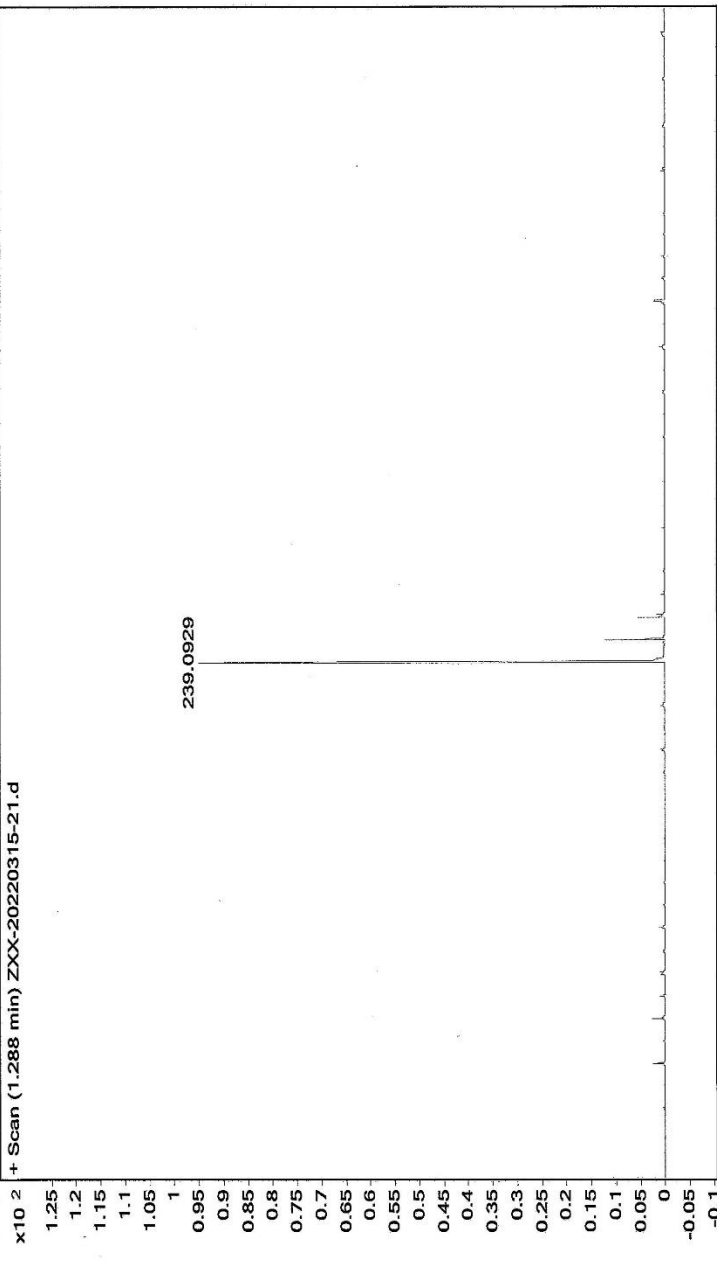

0804-1

3-(6-aminopyridin-3-yl)benzamide (3)

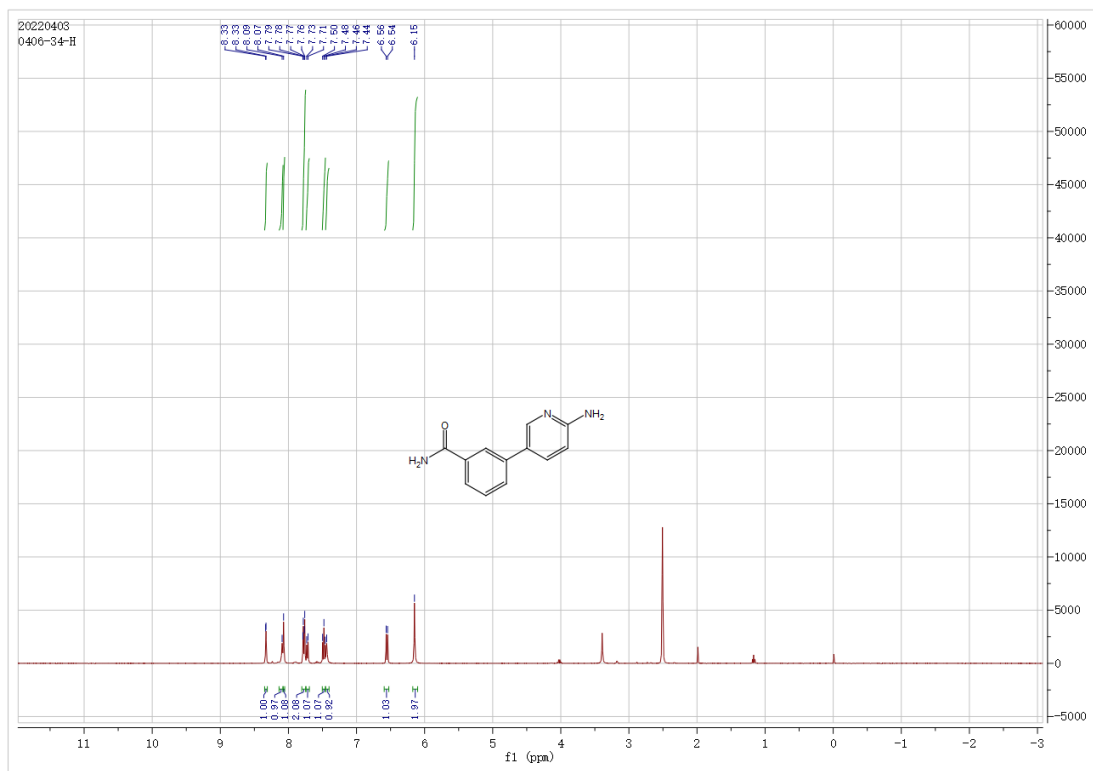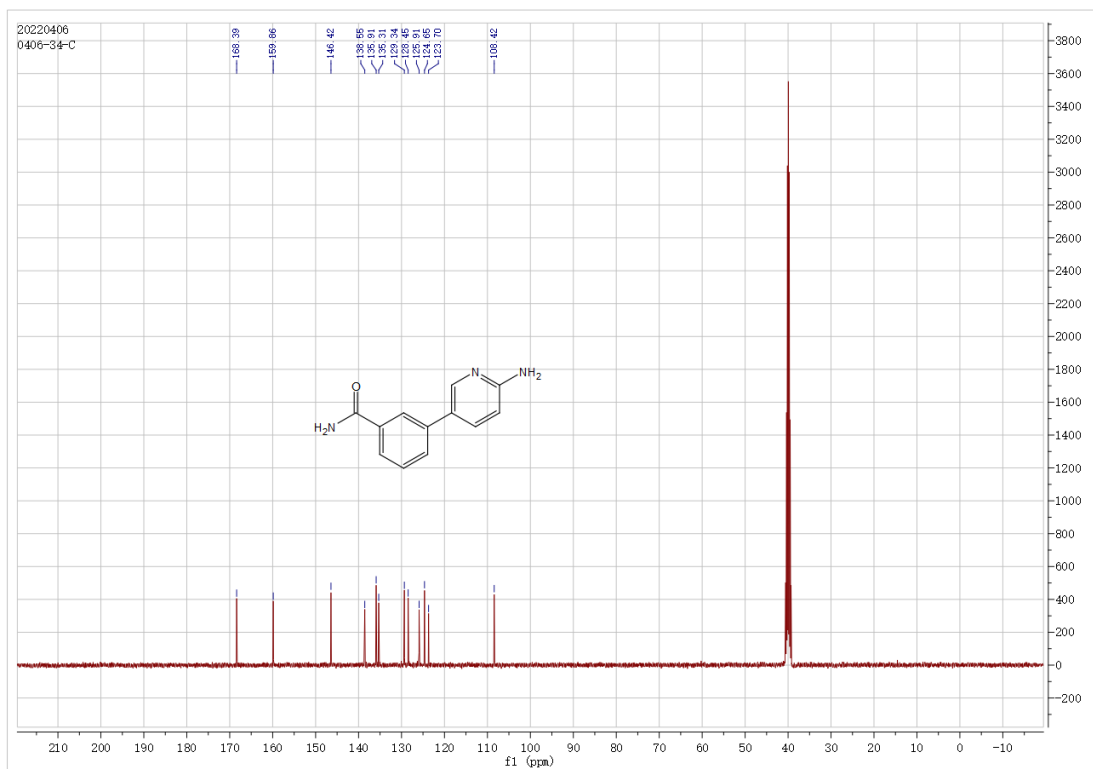

**Sample Name** ZXX-2022-0321-115 **Position** Vial 15 **Instrument Name** Instrument 1 **User Name** All Ions Missed  
**Inj Vol** 2 **InjPosition** 2020LXSp0.m **SampleType** Sample **IRM Calibration Status** 3/21/2022 9:33:38 PM  
**Data Filename** ZXX-2022-0321-115.d **Acq Method** ZXX-2022-0321-115.d **Comment**

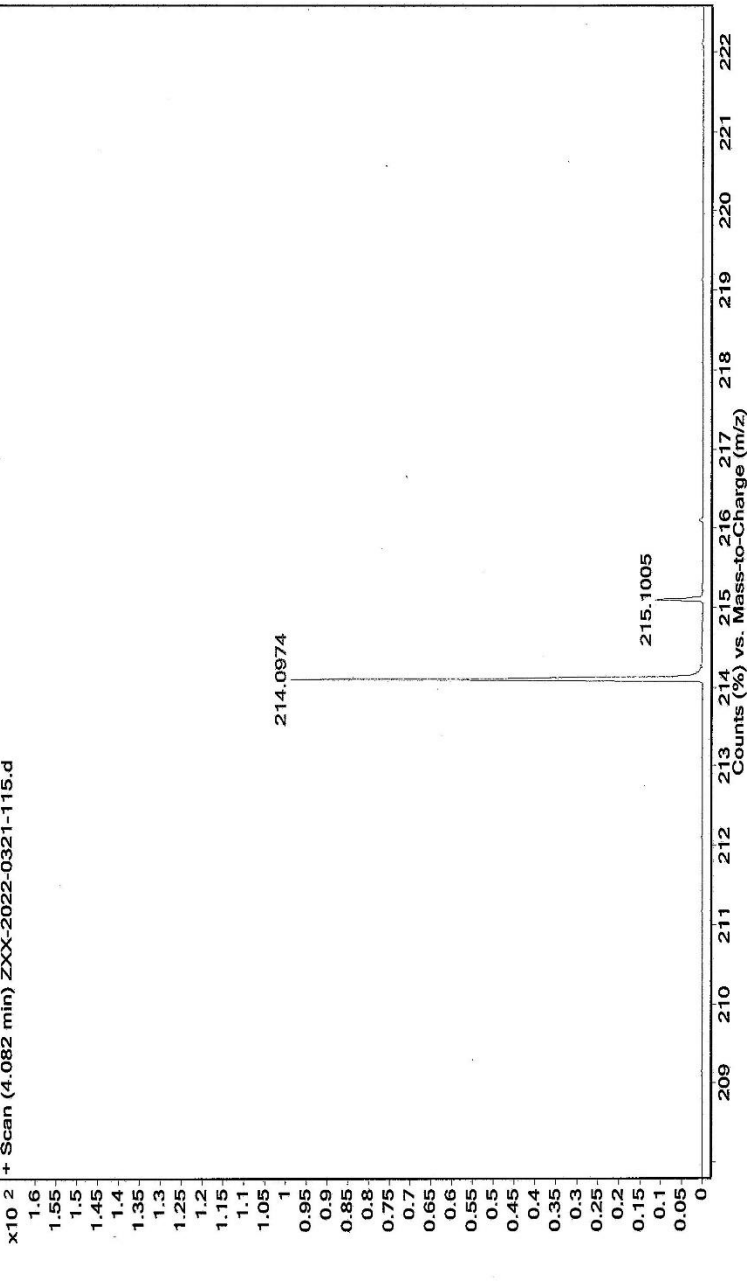

0311-3

3-(6-amino-5-chloropyridin-3-yl)benzamide (4)

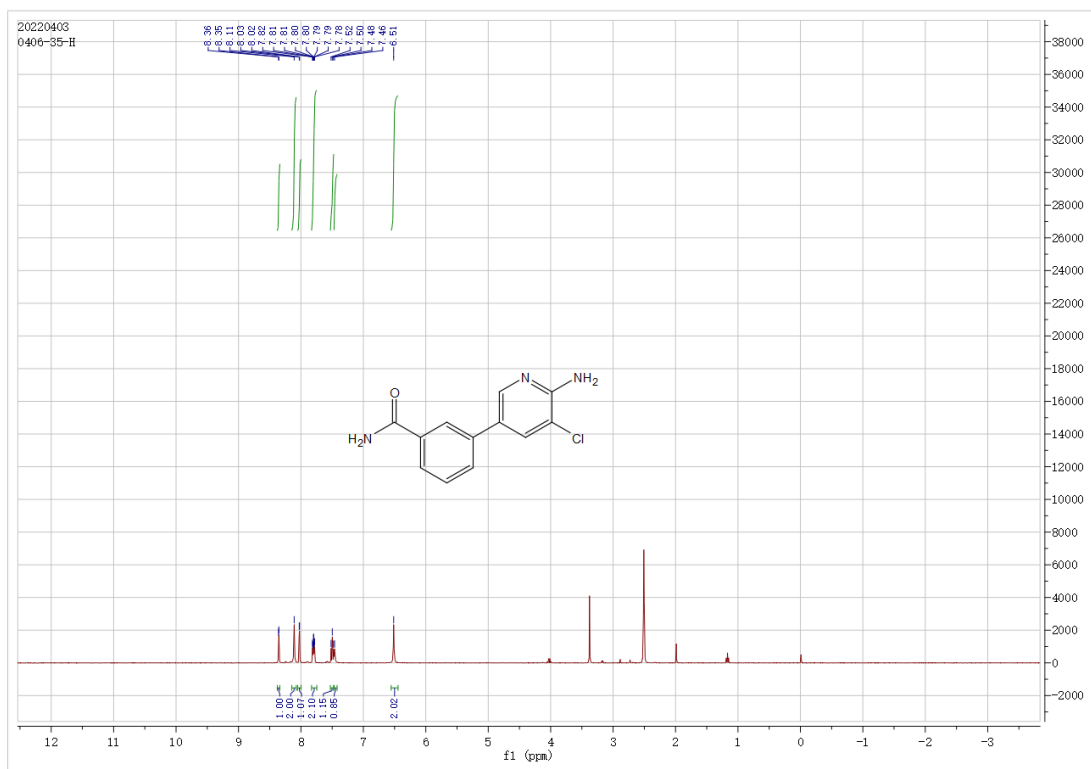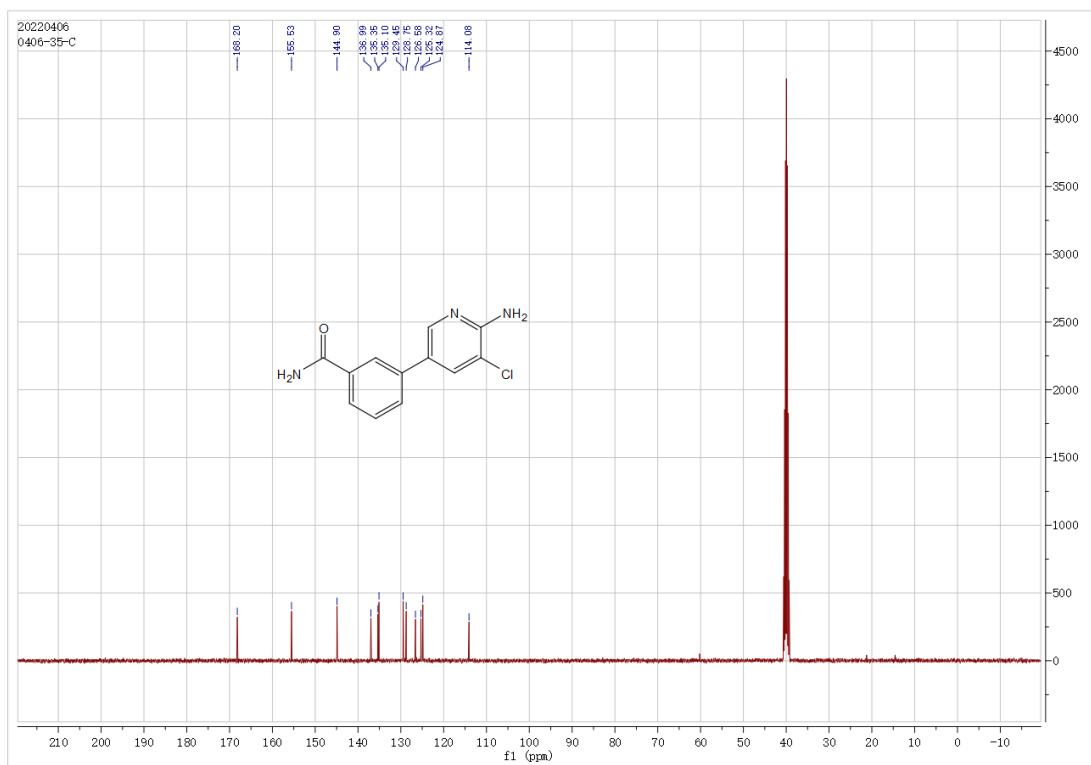

Sample Name ZXX-2022-0321-116 Vial 16 Instrument Name Instrument 1 User Name All Ions Missed  
 Inj Vol 2 ZXX-2022-0321-116.d InjPosition ACQ Method 2020LXSp0.m Sample Sample IRM Calibration Status 3/21/2022 9:40:25 PM  
 Data Filename ZXX-2022-0321-116.d + Scan (2.663 min) ZXX-2022-0321-116.d Comment Comment Acquired Time

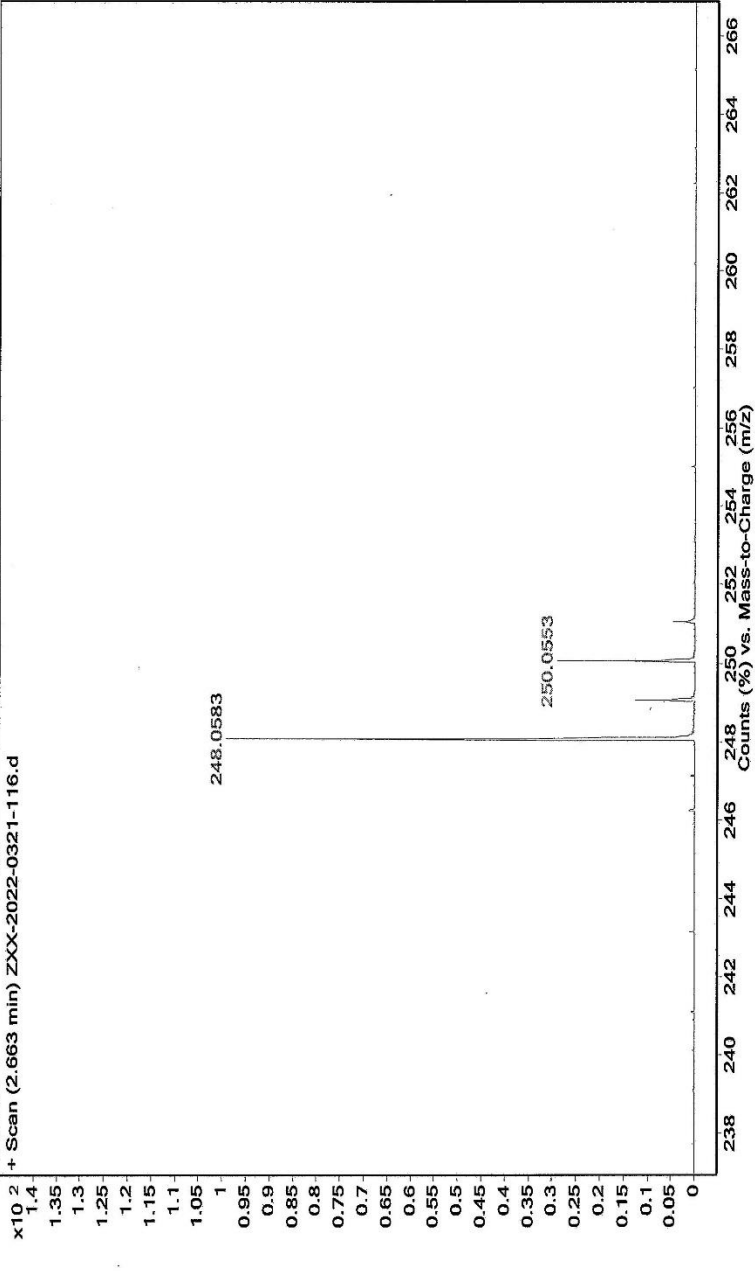

0321-4

3-(isoquinolin-4-yl)benzamide (5)

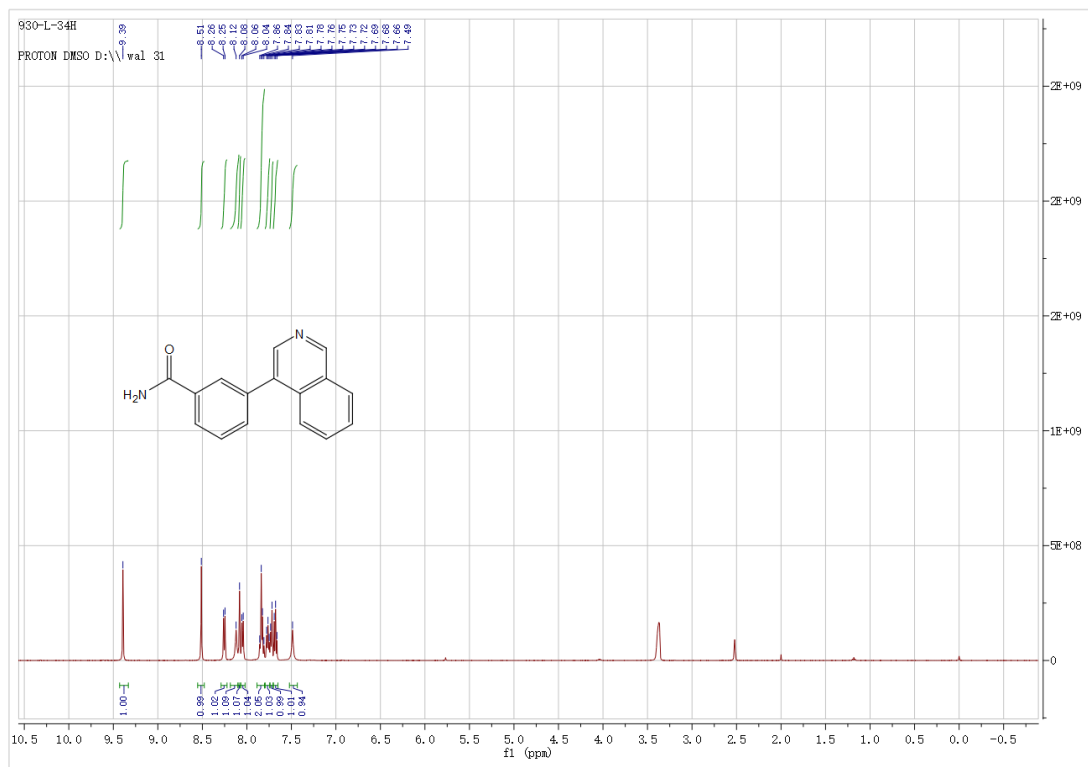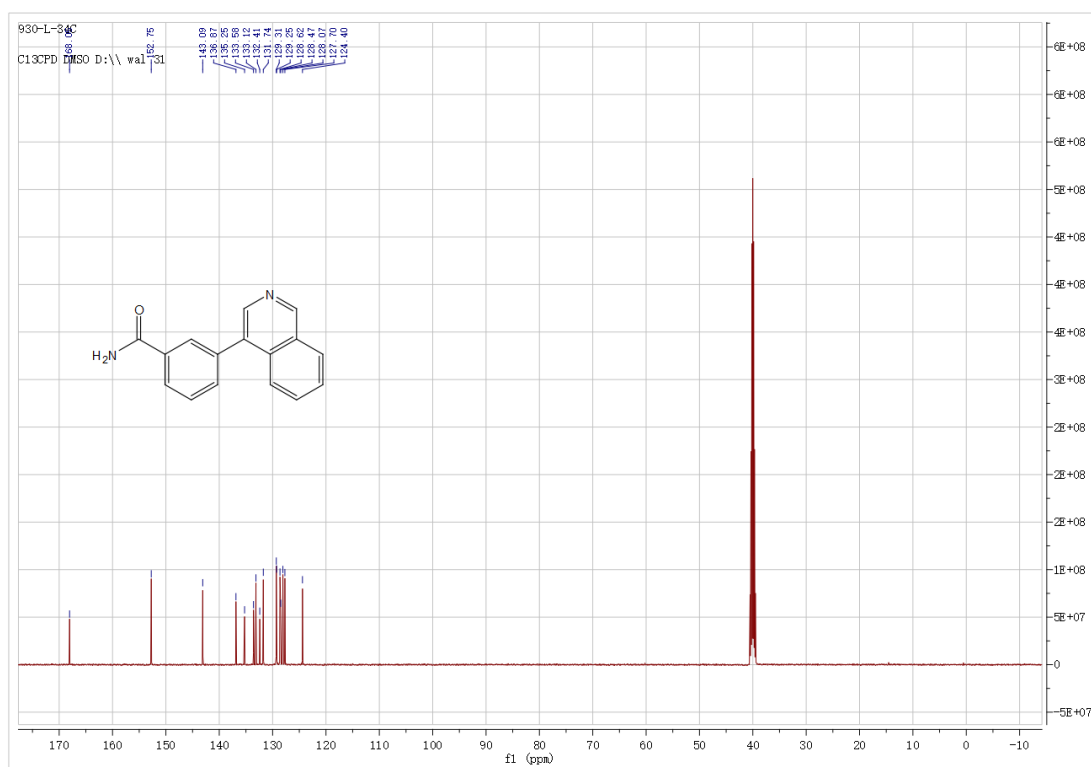



C16H12N2O  
 07/22/2021 11:04:01 AM  
 249.1022

Sample Name ZXX-0722-4  
 Inj Vol 2  
 Data Filename ZXX-0722-4.d  
 Position InjPosition  
 ACQ Method  
 Instrument Name Sample  
 SampleType  
 Comment  
 User Name  
 IRM Calibration Status  
 Acquired Time

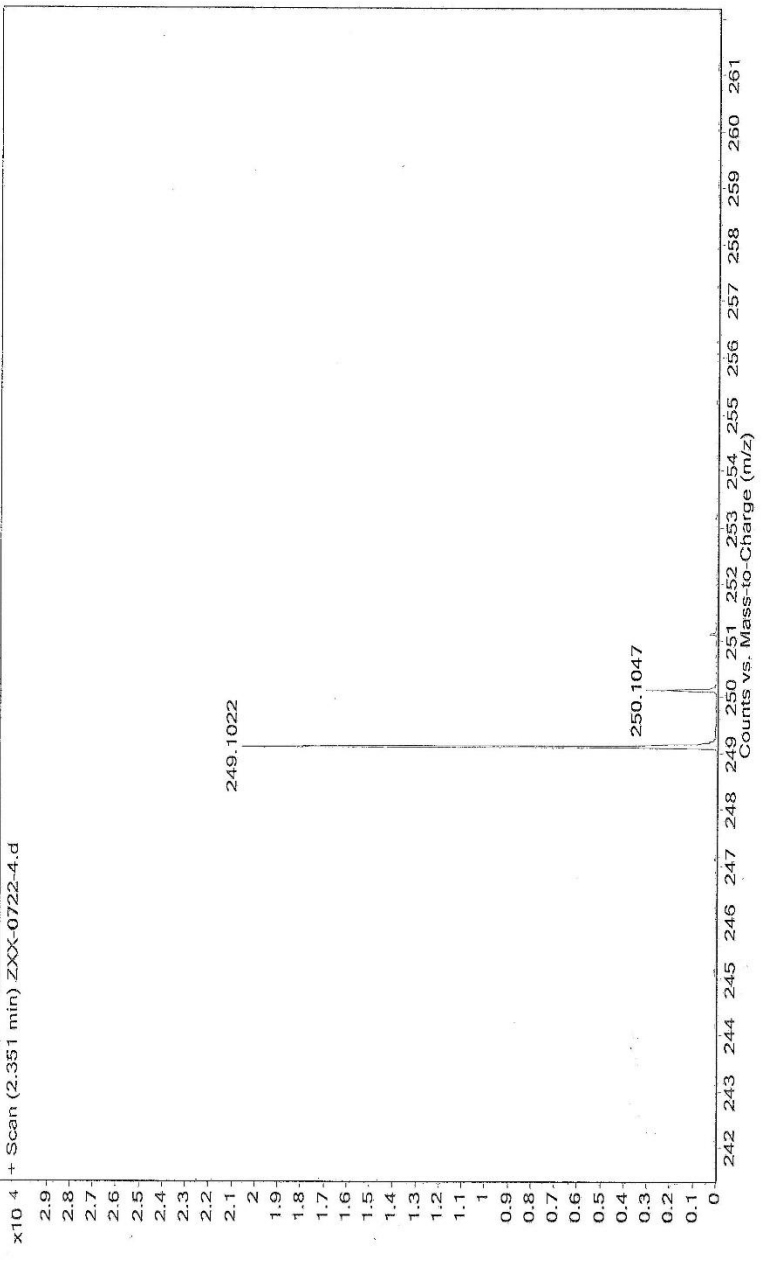

07/22  
 2021



C6H13N3  
08/17/21 10:57:13 AM  
All ions missed  
7/22/2021 10:57:13 AM

Sample Name ZXX-0722-3 Vial 33 Instrument Name Instrument 1 User Name  
Inj Vol 2 Inj Position Inj Position IRM Calibration Status  
Data Filename ZXX-0722-3.d ACQ Method 2020LX500.m SampleType Sample IRM Calibration Status  
Comment  
+ Scan (4.055 min) ZXX-0722-3.d

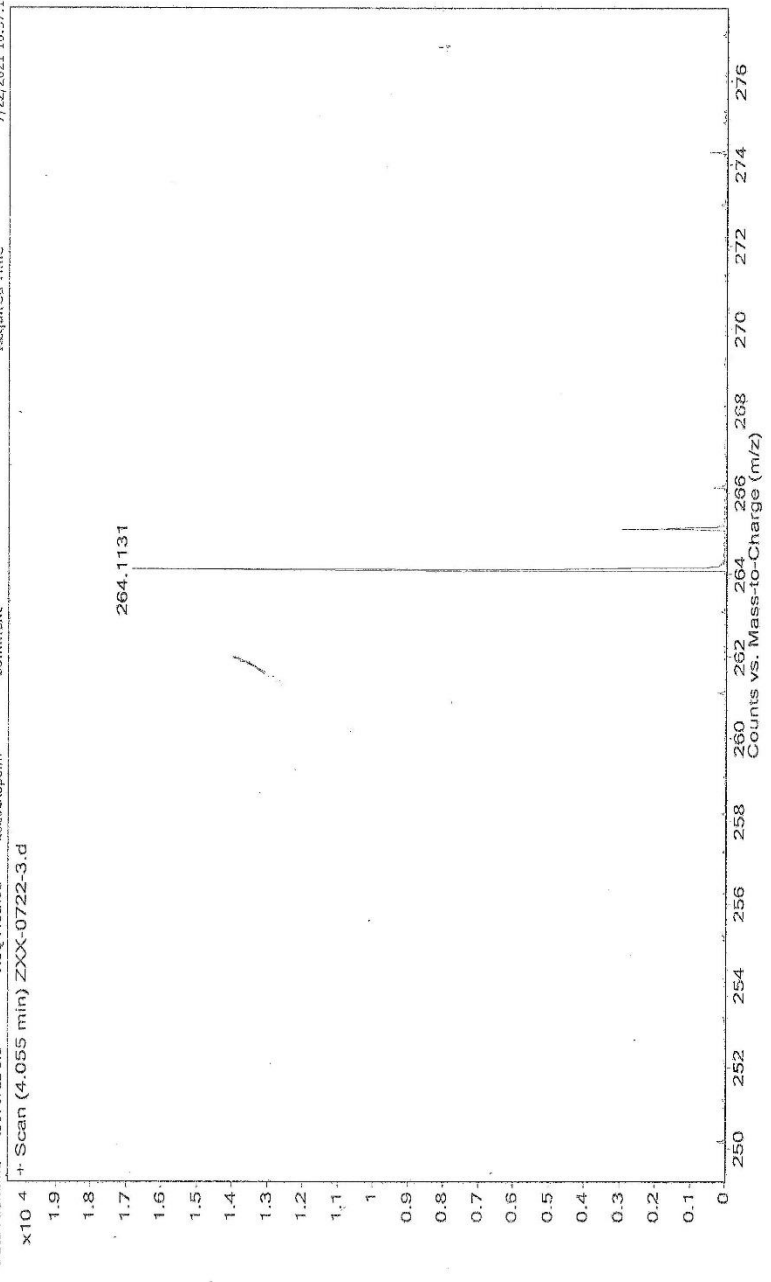

0/002  
204

3-(1H-indol-5-yl)benzamide (7)

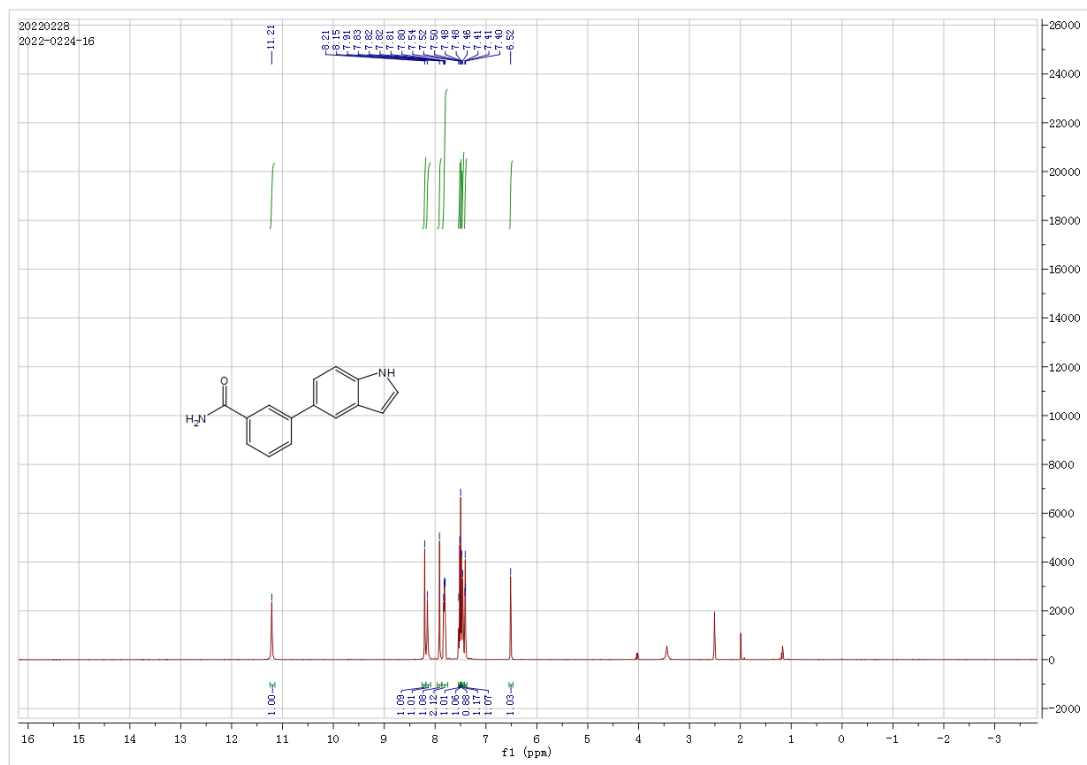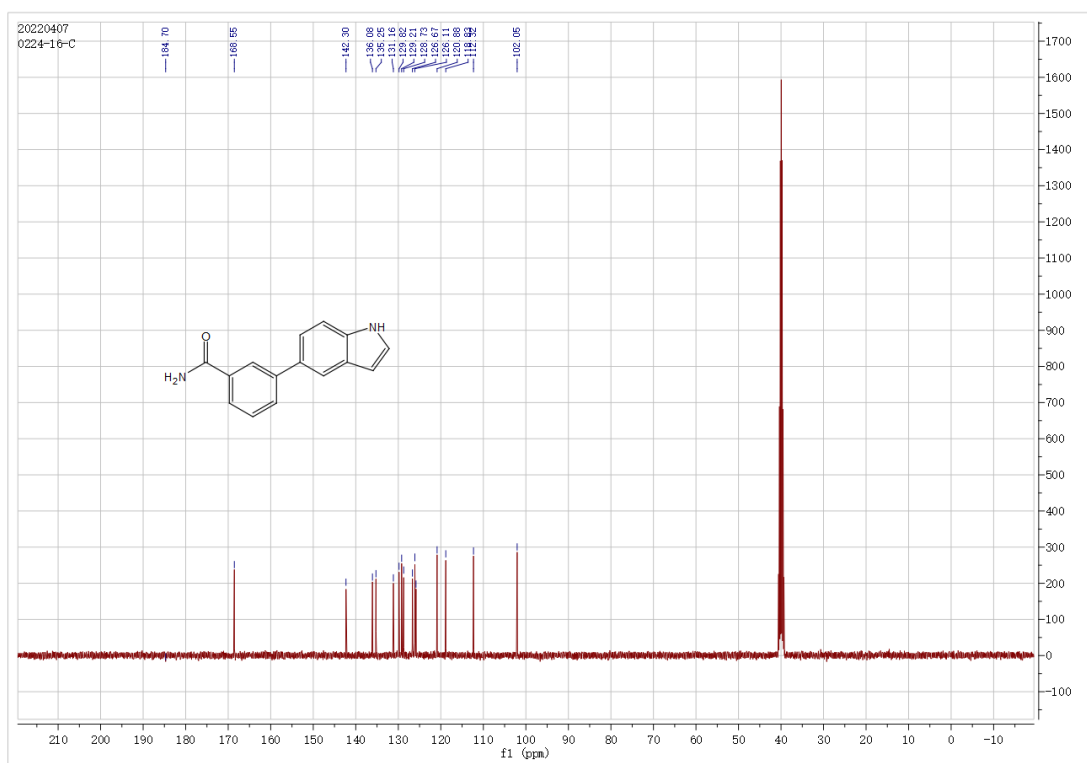

Sample Name ZX-2022-0224-116 Position Val 16 Instrument Name Instrument 1 User Name All Ions Missed  
 Inj Vol 2 InjPosition 2020LXSpom Sample Sample IRM Calibration Status 2/24/2022 11:57:43 PM  
 Data Filename ZX-2022-0224-116.d ACQ Method 2020LXSpom Comment Acquired Time  
 x10 2 + Scan (0.931 min) ZX-2022-0224-116.d

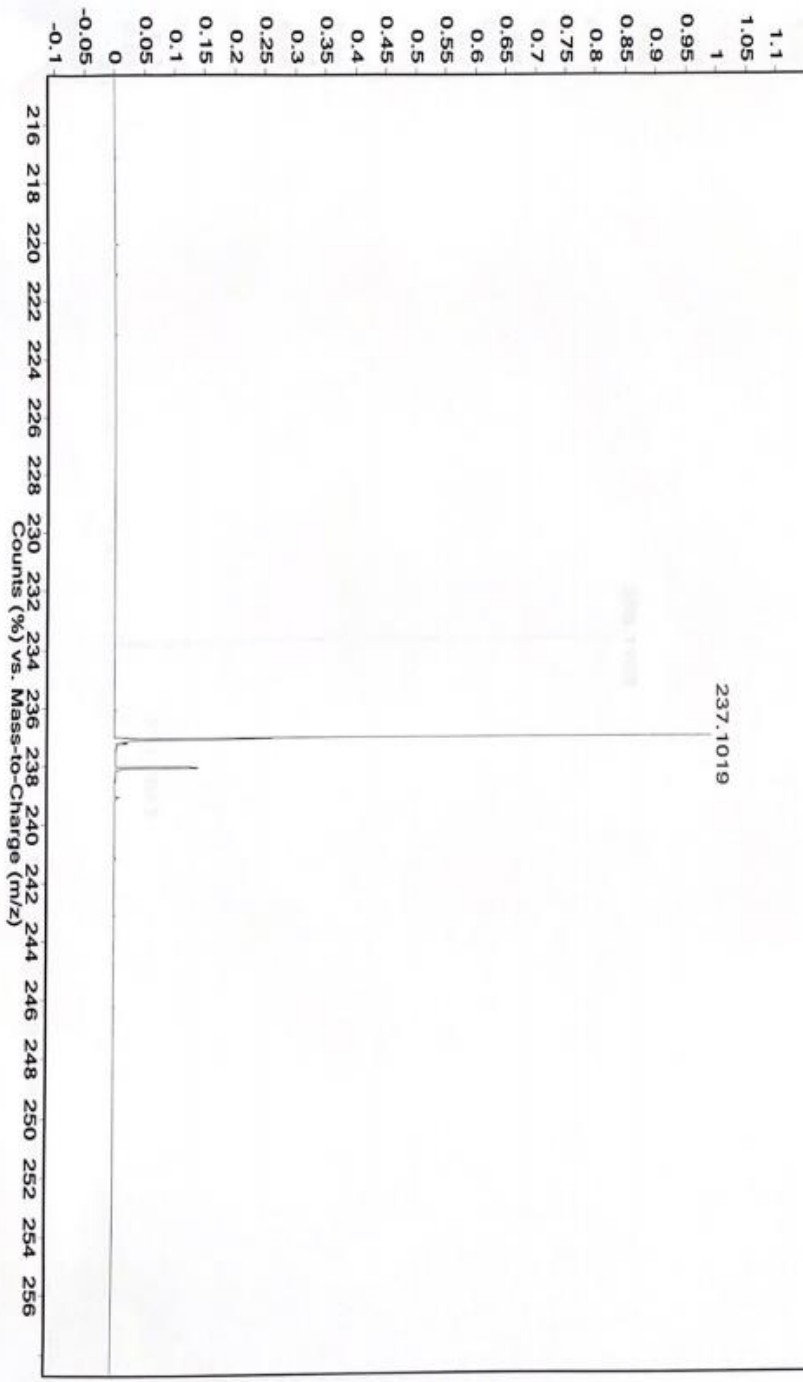

3-(1-methyl-1H-indol-5-yl)benzamide (8)

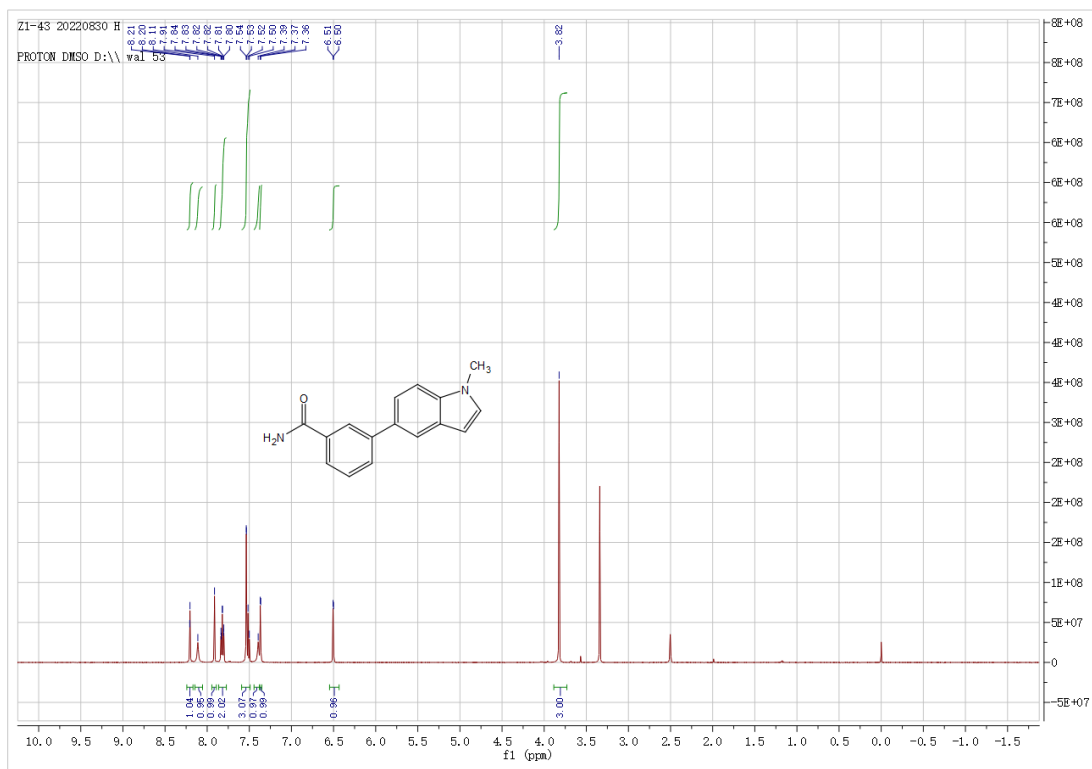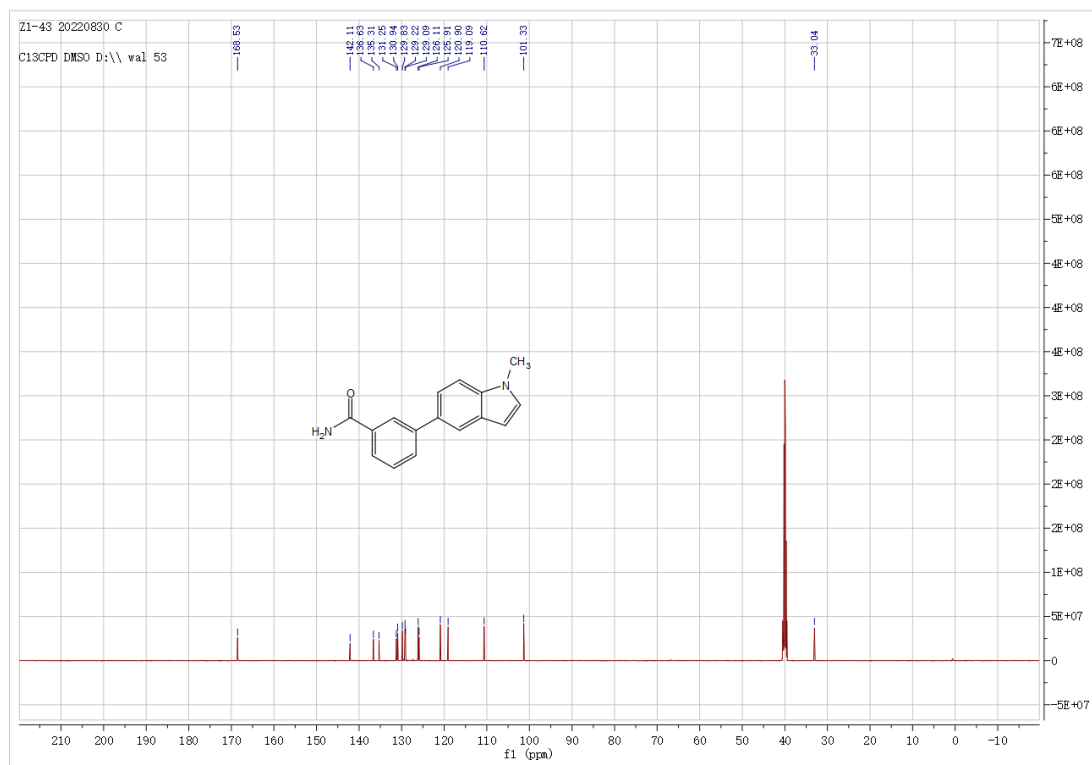



3-(benzofuran-5-yl)benzamide (9)

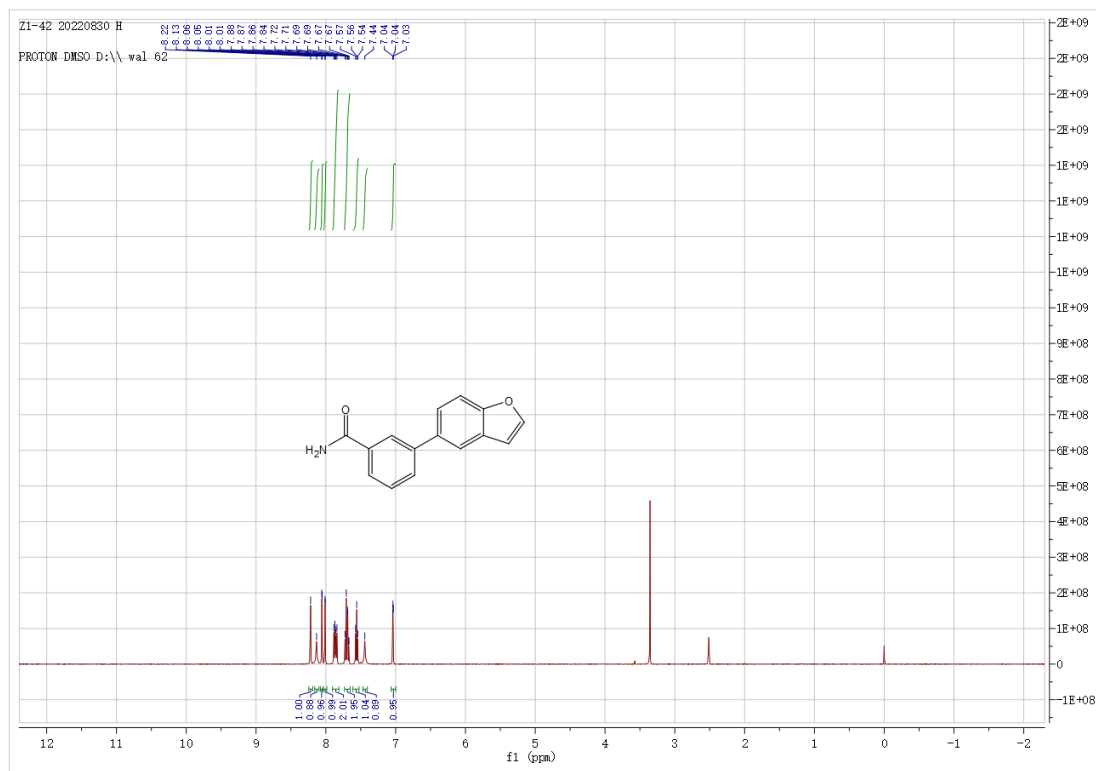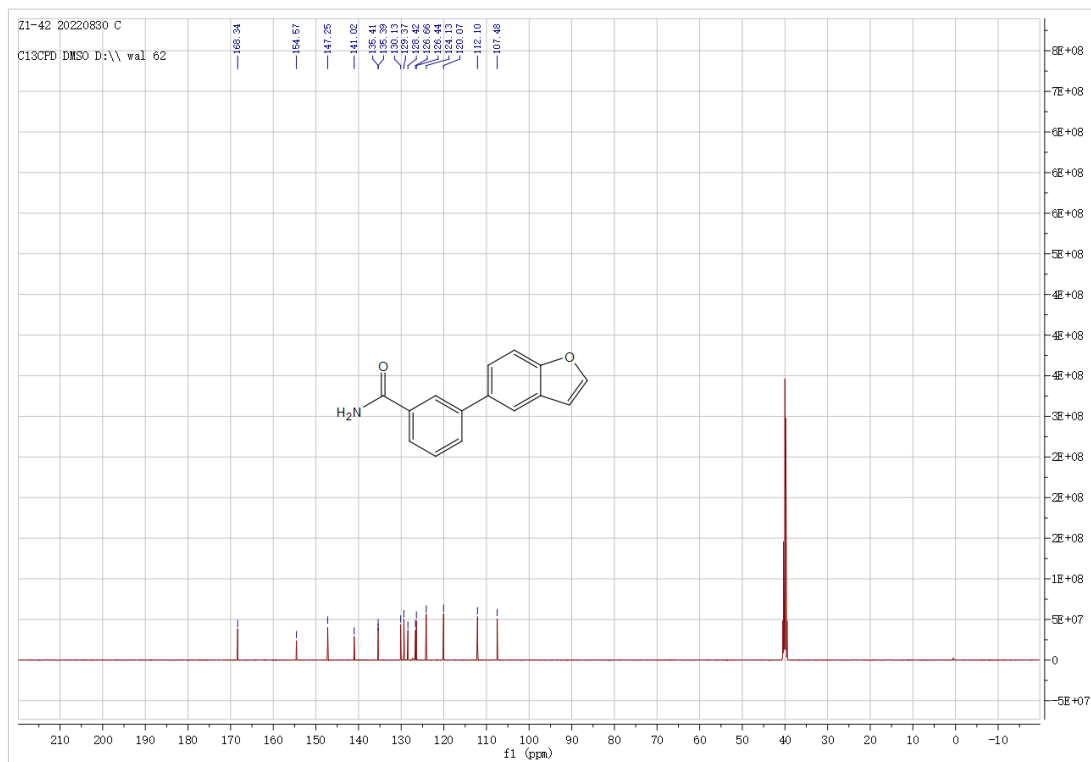



Sample Name ZXX-2022-0623-115 Position Vial 15 Instrument Name Instrument 1 User Name  
 Inj Vol 2 InjPosition ACQ Method 2020LX500.m SampleType Sample Sample Some Ions Missed  
 Data Filename ZXX-2022-0623-115.d ACQ Method 2020LX500.m Comment Instrument 1 Sample 6/23/2022 9:22:46 PM  
 + Scan (3.051 min) ZXX-2022-0623-115.d

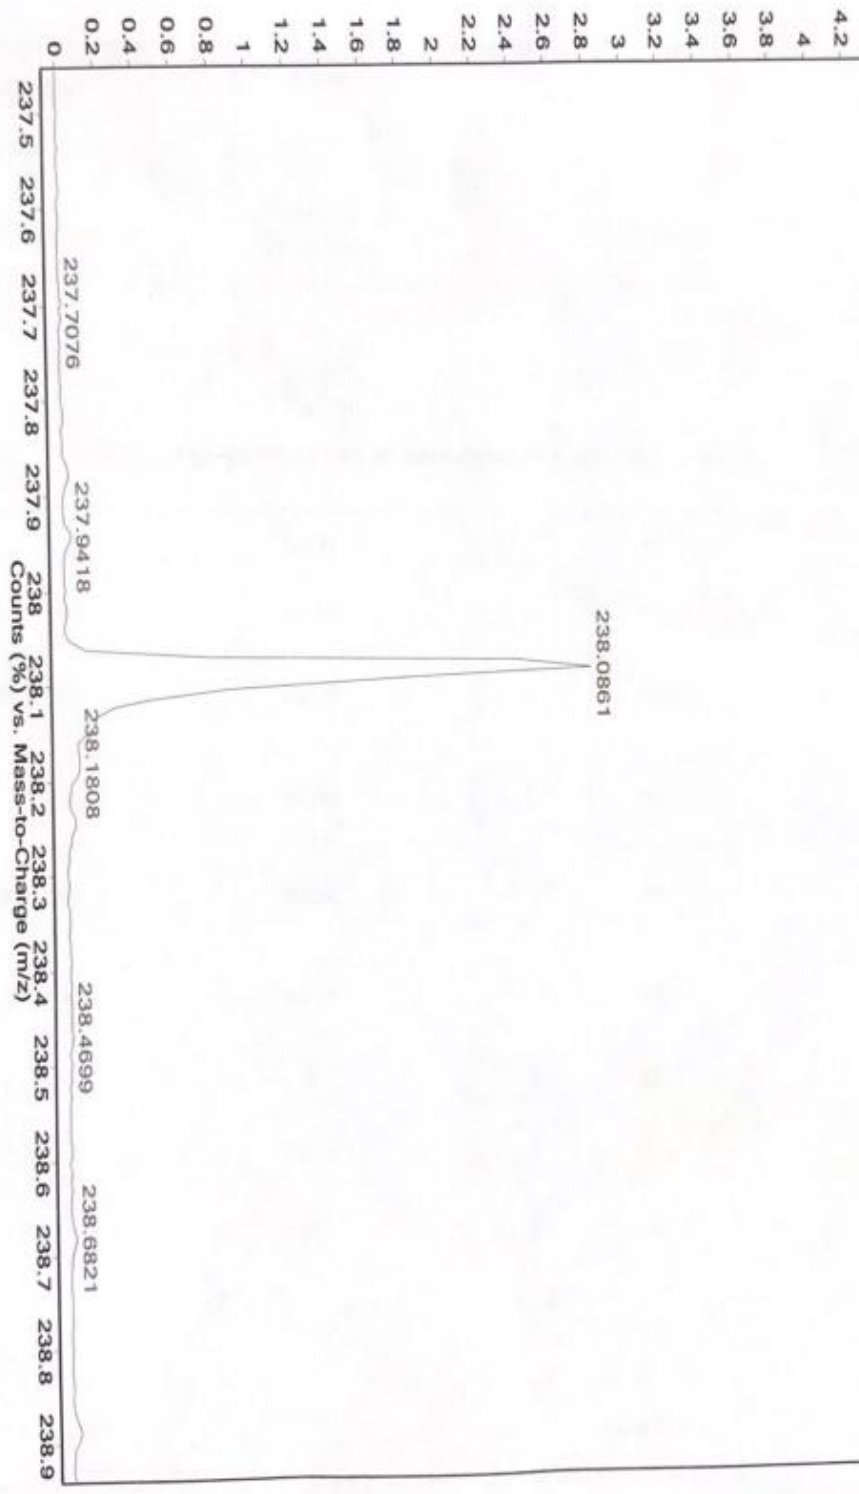



022-0623-110 Position Vial 10 Instrument Name Instrument 1 User Name  
022-0623-110.d InjPosition 2020LX500m SampleType Sample IRM Calibration Status  
1.170 min) ZXK-2022-0623-110.d Comment

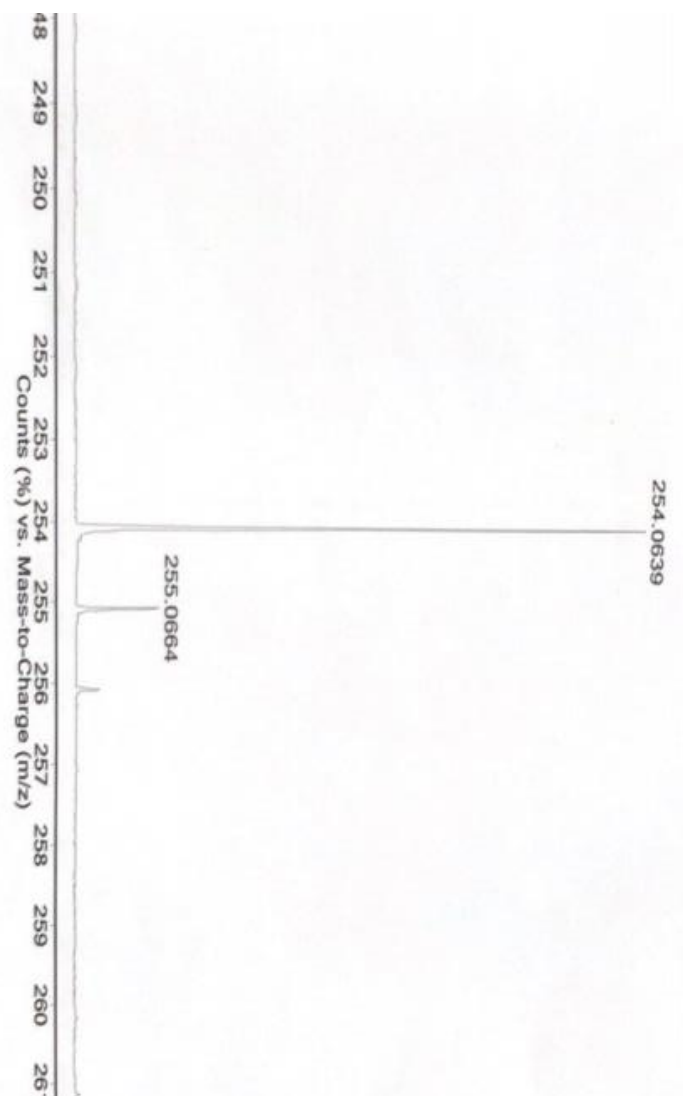

*3-(3-chloro-1H-pyrrolo[2,3-b]pyridin-5-yl)benzamide (11)*

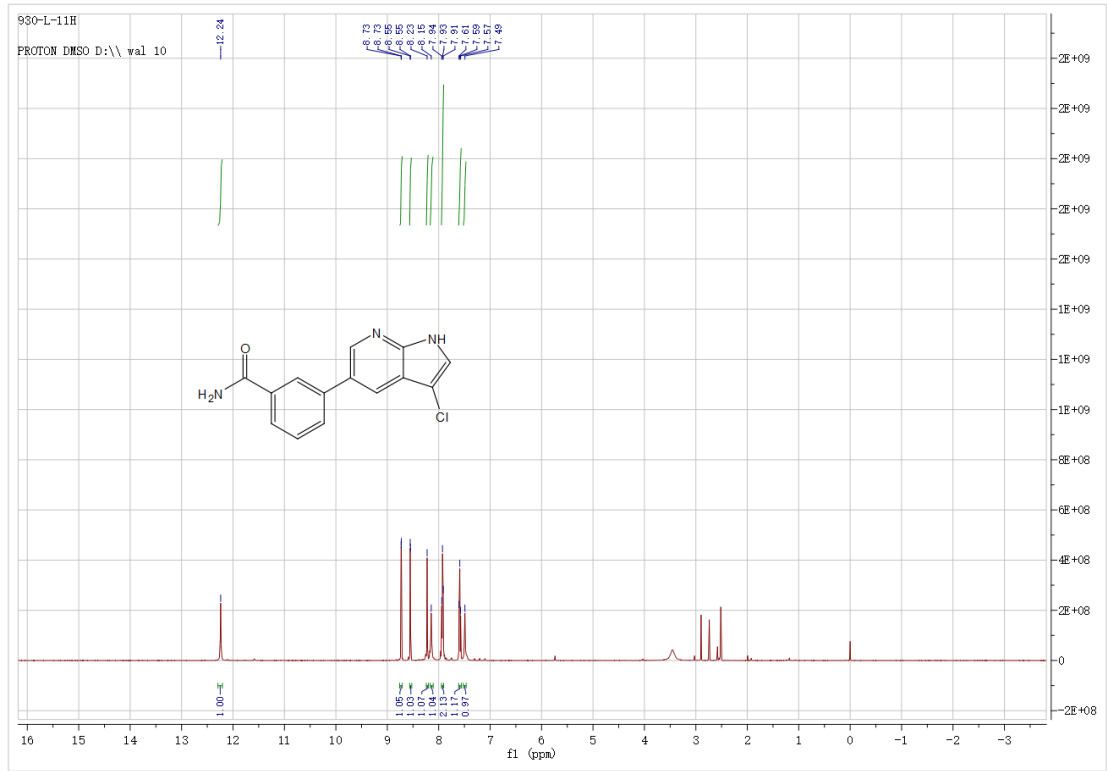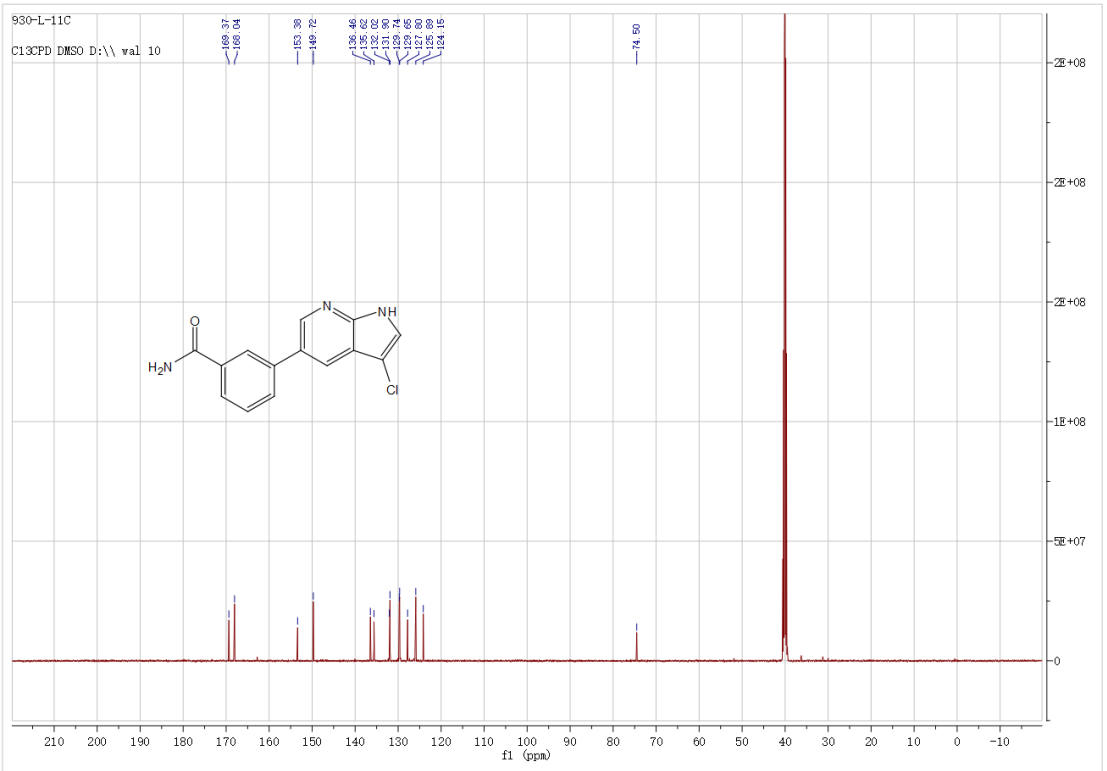

C14H10N3O4  
CA1247-272.0585

Sample Name: ZX-0725-10  
Inj Vol: 2  
Data Filename: ZX-0725-10.d  
Position: InjPosition  
ACQ Method: 2020LXSp0.m  
Vial ID: 2020LXSp0.m  
Instrument Name: Sample  
SampleType: Comment  
Instrument 1: Sample  
User Name: IRM  
IRM Calibration Status: Acquired Time  
All Ions Missed  
7/23/2021 9:03:04 AM

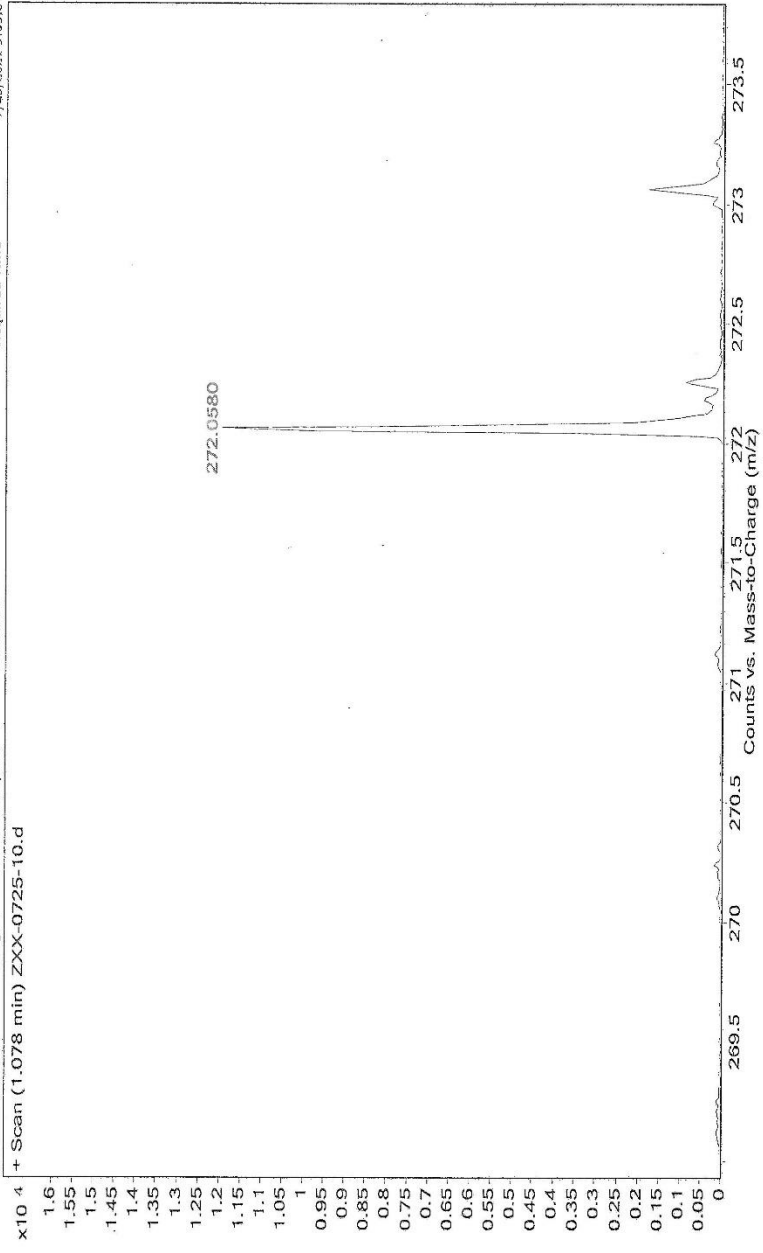

0529-2



Sample Name ZXX-2022-0301-127  
 Inj Vol 2  
 Data Filename ZXX-2022-0301-127.d  
 Vial 27  
 Instrument Name Sample  
 Instrument 1  
 User Name  
 IRM Calibration Status  
 Acquired Time 3/1/2022 2:34:56 PM  
 All Ions Missed

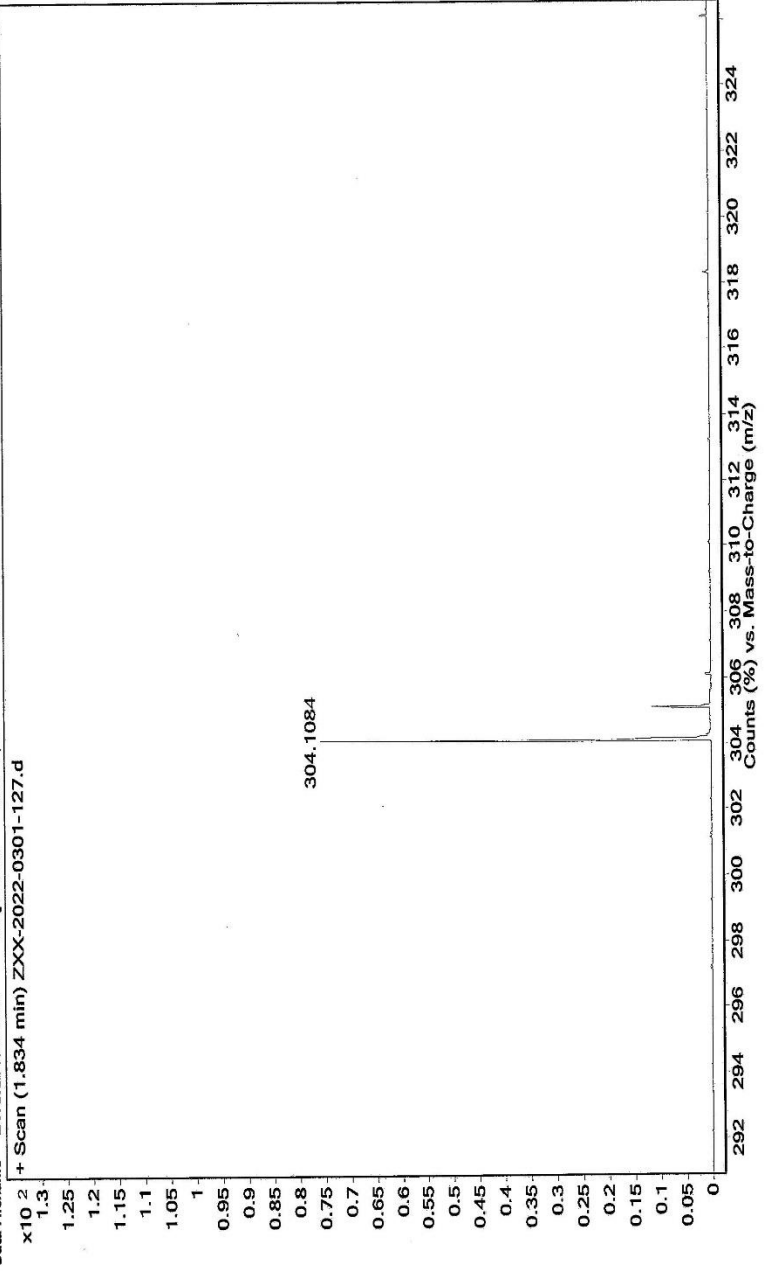

0926-1

3-(3-(thiophen-3-yl)-1H-pyrrolo[2,3-b]pyridin-5-yl)benzamide (13)

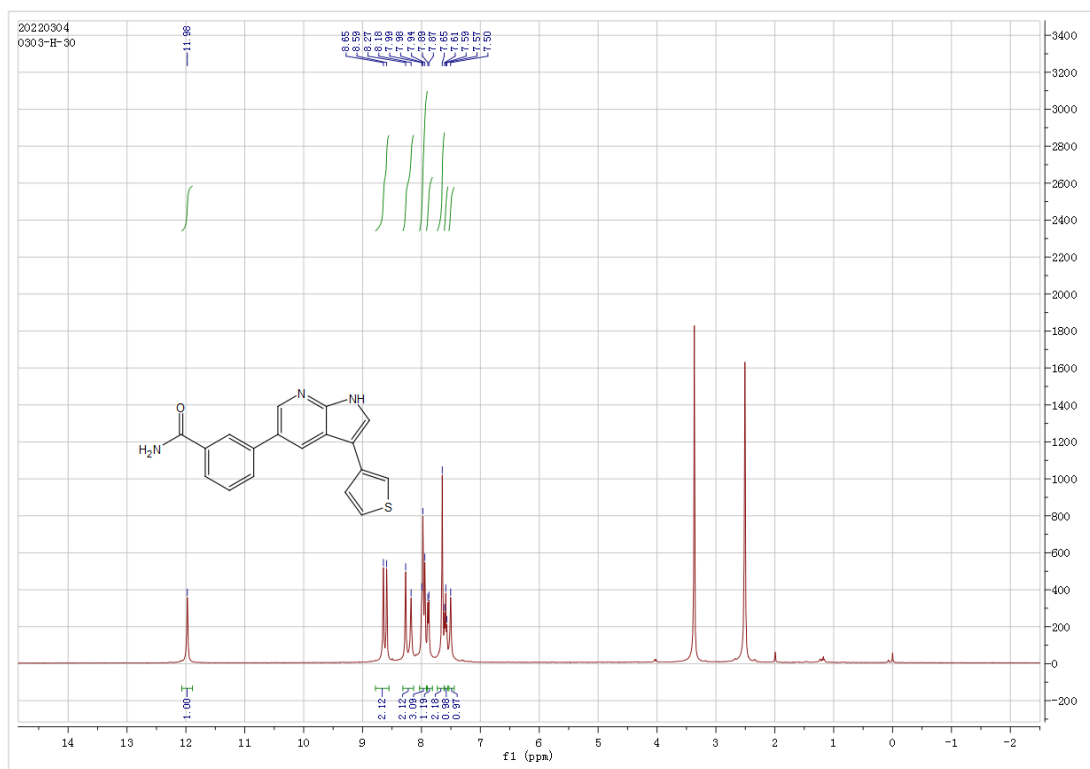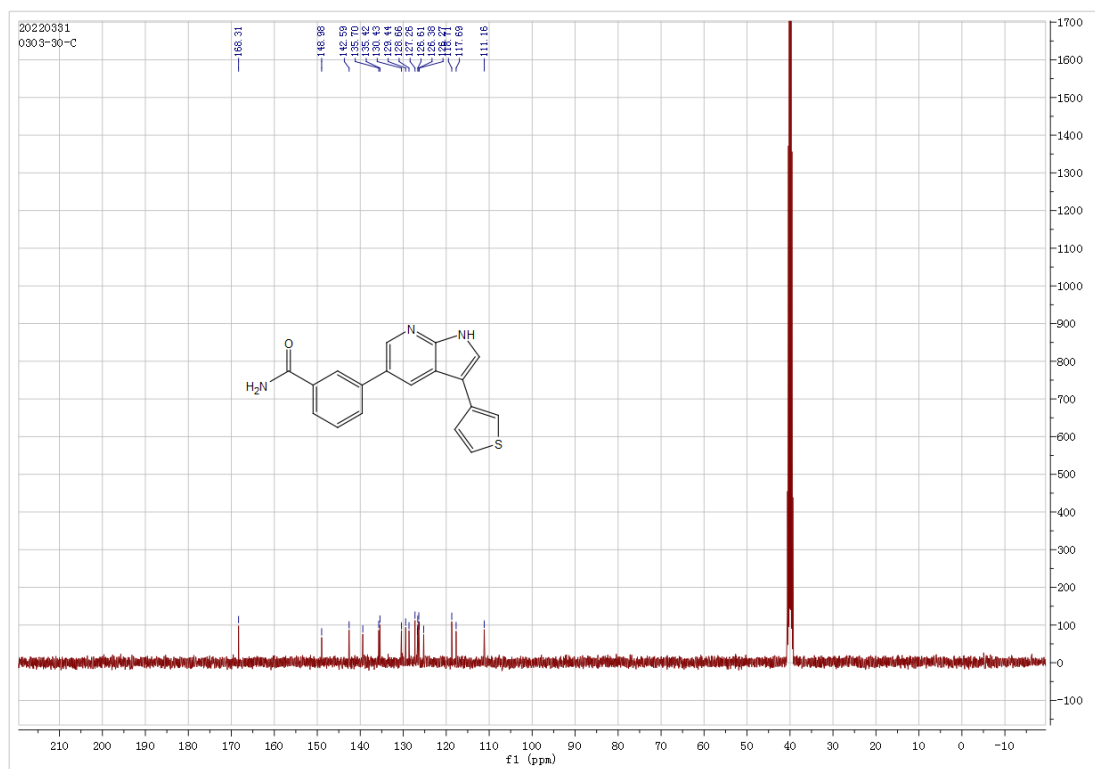



Sample Name ZXX-2022-0301-138 Position Vial 38 Instrument Name Instrument.1 User Name All Ions Missed  
 Inj Vol 2 InjPosition 2020LXSp0.m Sample IRM Calibration Status 3/1/2022 3:49:40 PM  
 Data Filename ZXX-2022-0301-138.d ACQ Method Comment Acquired Time

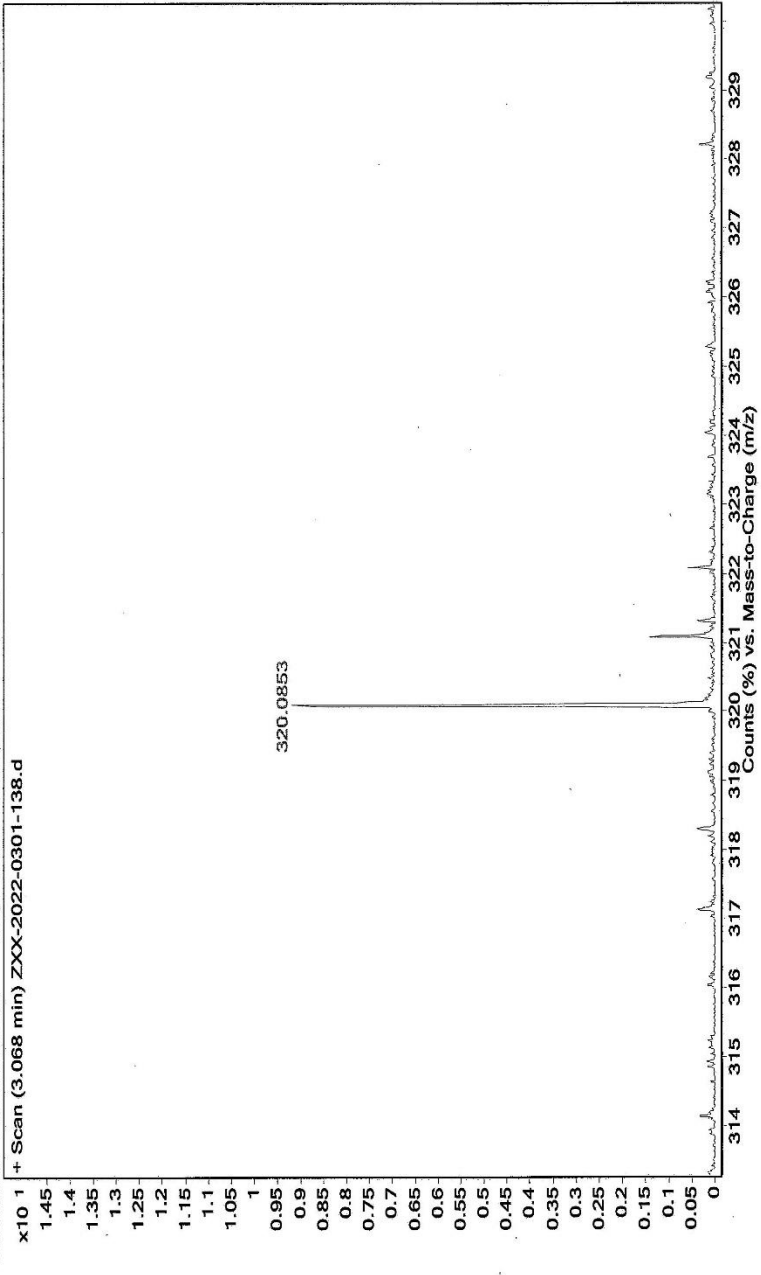

6257



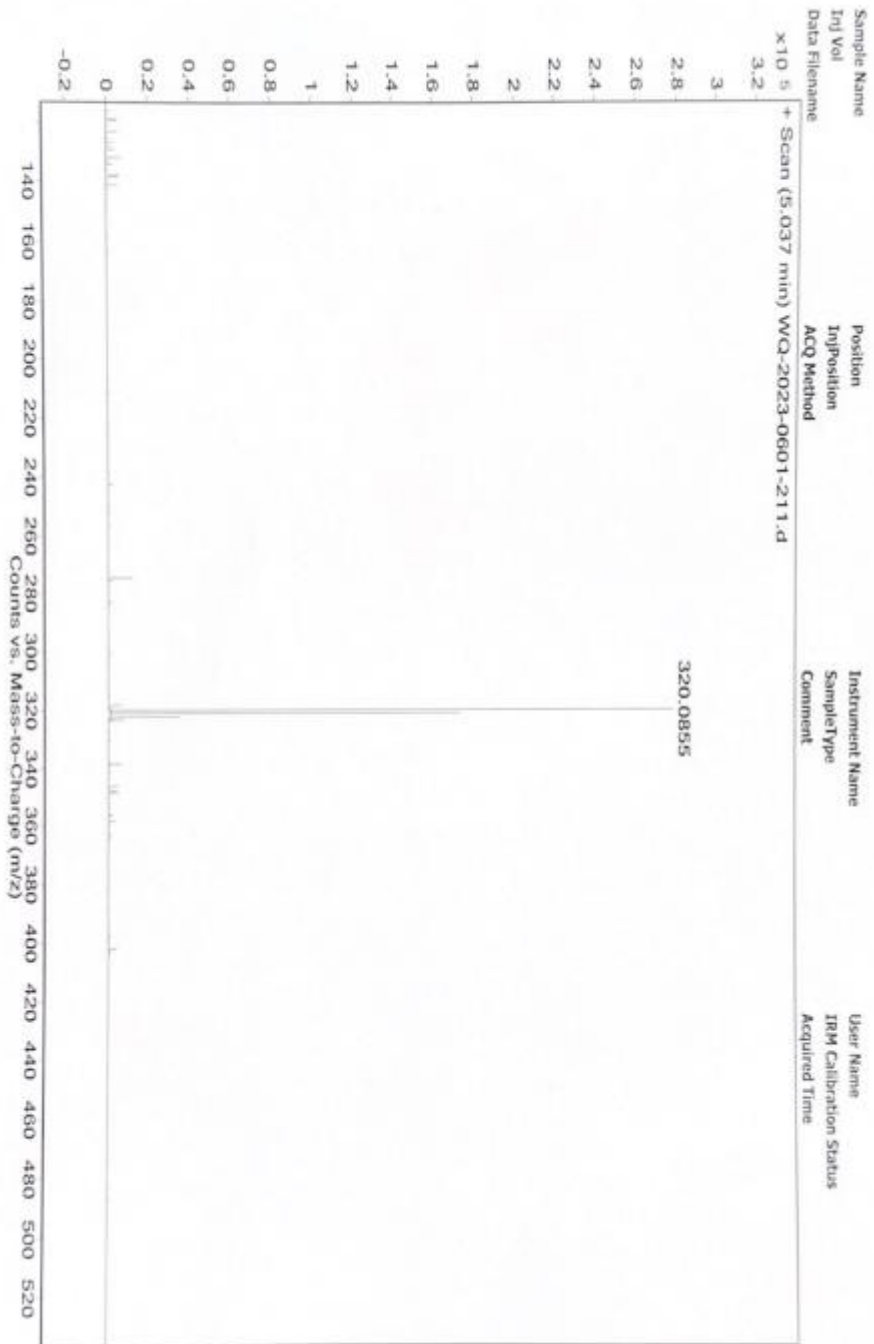

3-(3-(1H-pyrazol-4-yl)-1H-pyrrolo[2,3-b]pyridin-5-yl)benzamide (15)

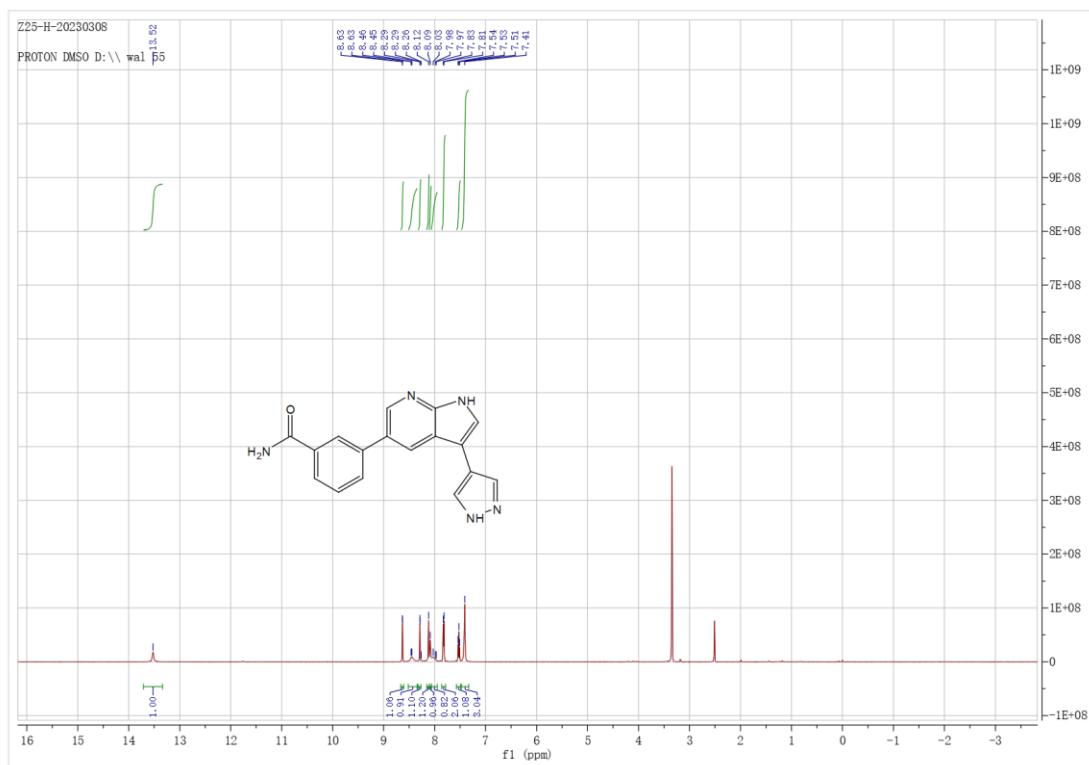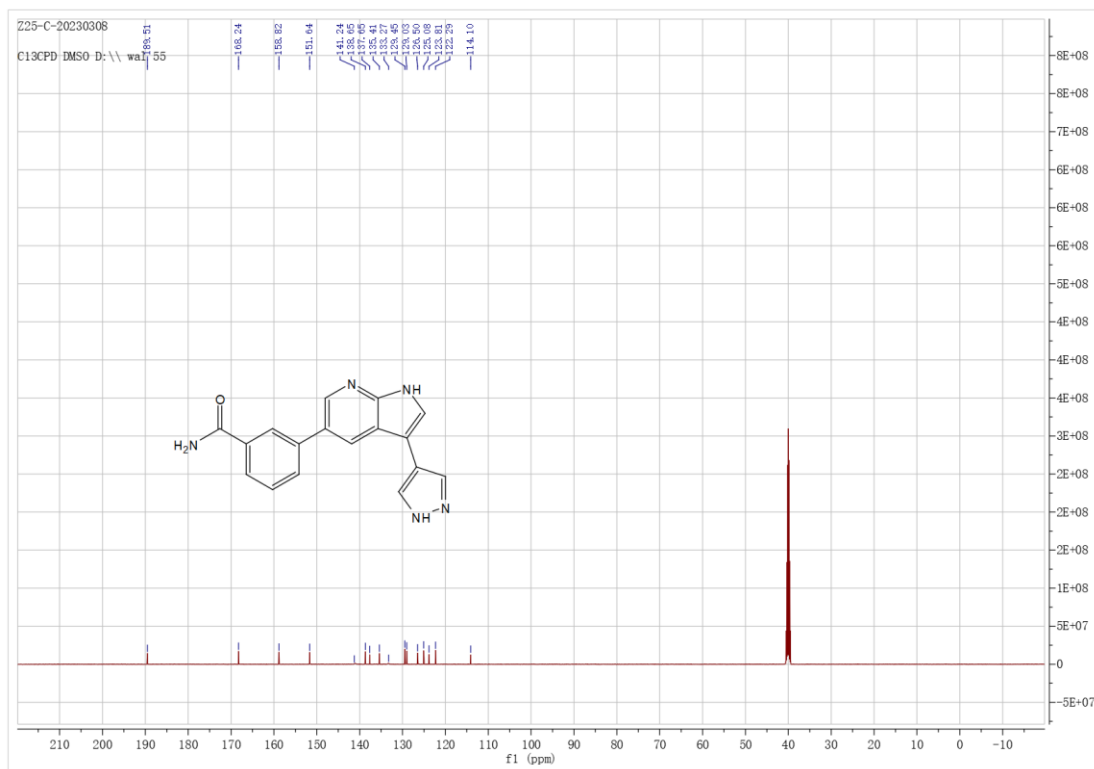

Sample Name  
Inj Vol  
Data Filename  
Position  
Inj Position  
ACQ Method  
Instrument Name  
Sample Type  
Comment  
User Name  
IRM Calibration Status  
Acquired Time

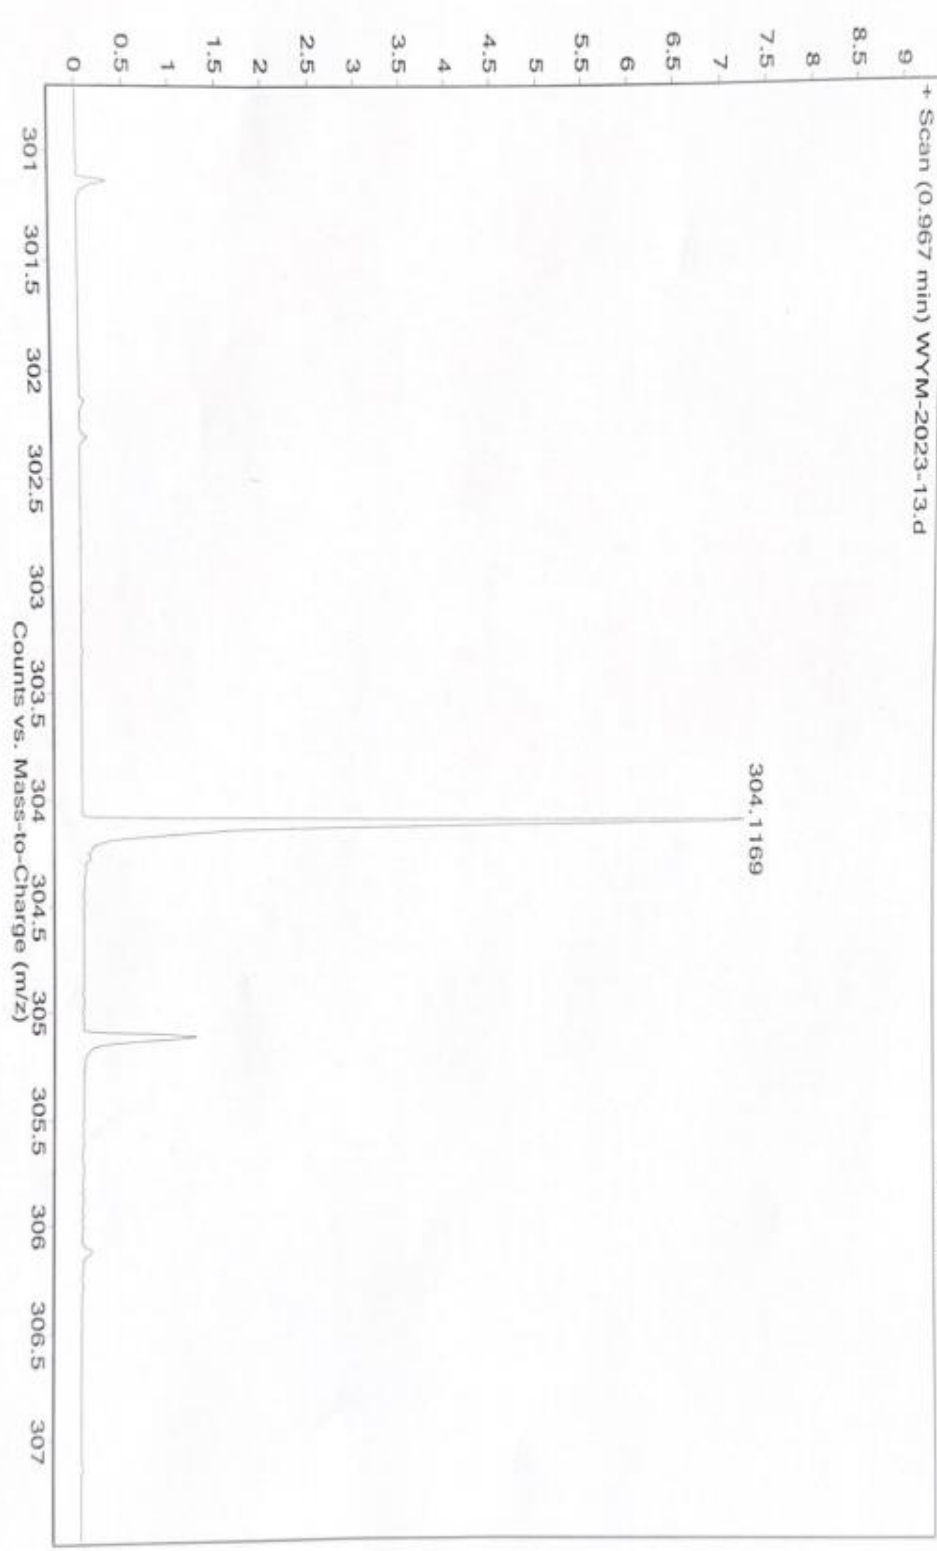



Sample Name ZXX-2022-0224-123 Vial 23 Instrument Name Instrument 1 User Name All Ions Missed  
 Inj Vol 2 Inj Position Inj Position SampleType Sample IRM Calibration Status  
 Data Filename ZXX-2022-0224-123.d ACQ Method 2020LXSp.m Comment Acquired Time 2/25/2022 12:45:19 AM  
 x10 2 + Scan (1.000 min) ZXX-2022-0224-123.d

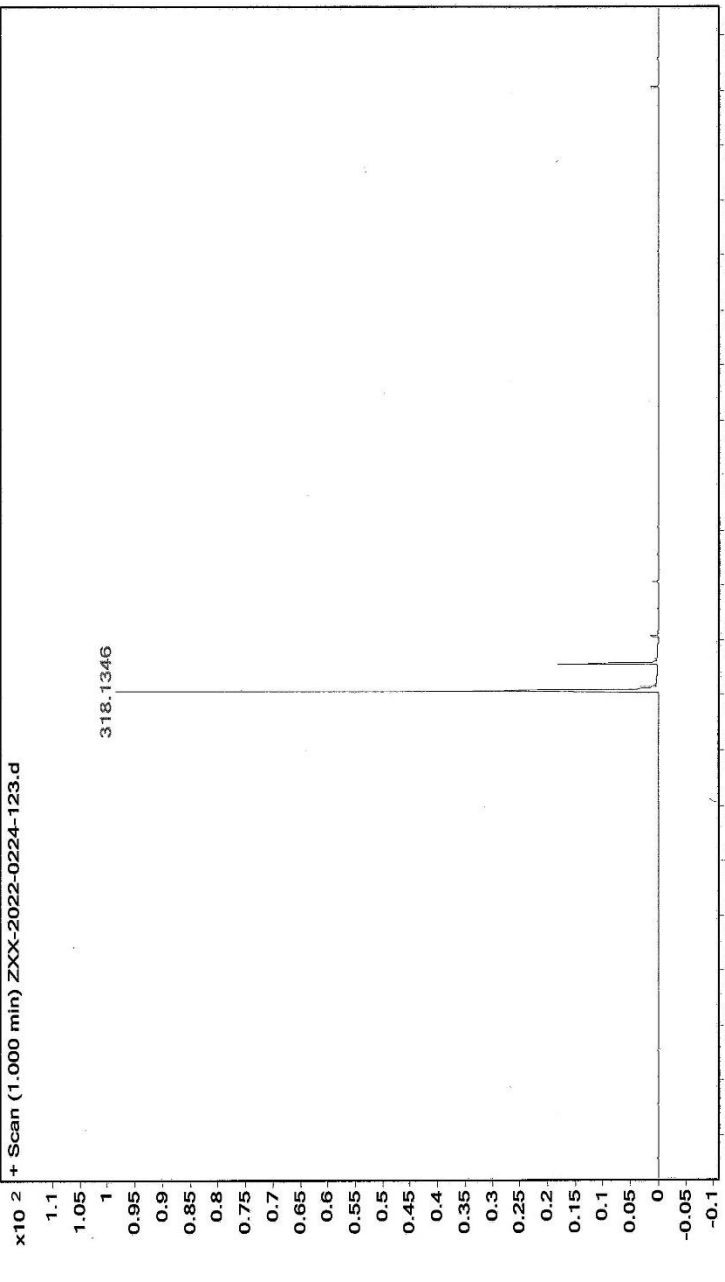

0927-1

3-(3-(1-(1-ethoxyethyl)-1H-pyrazol-4-yl)-1H-pyrrolo[2,3-b]pyridin-5-yl)benzamide  
(17)

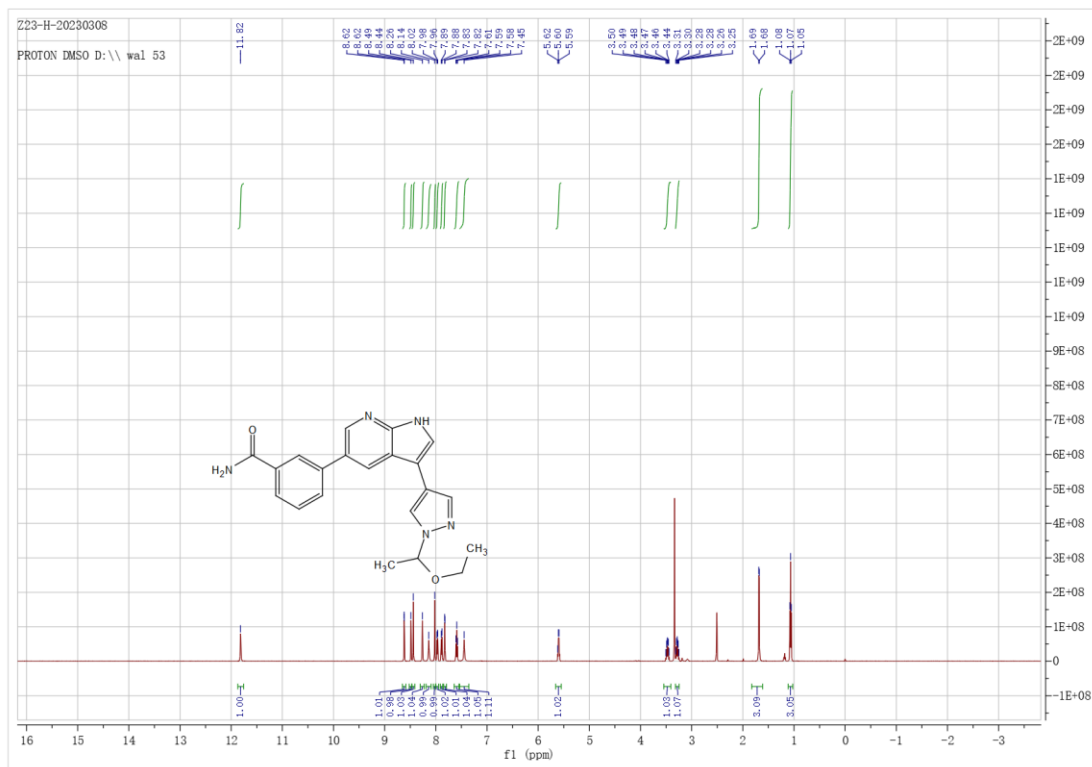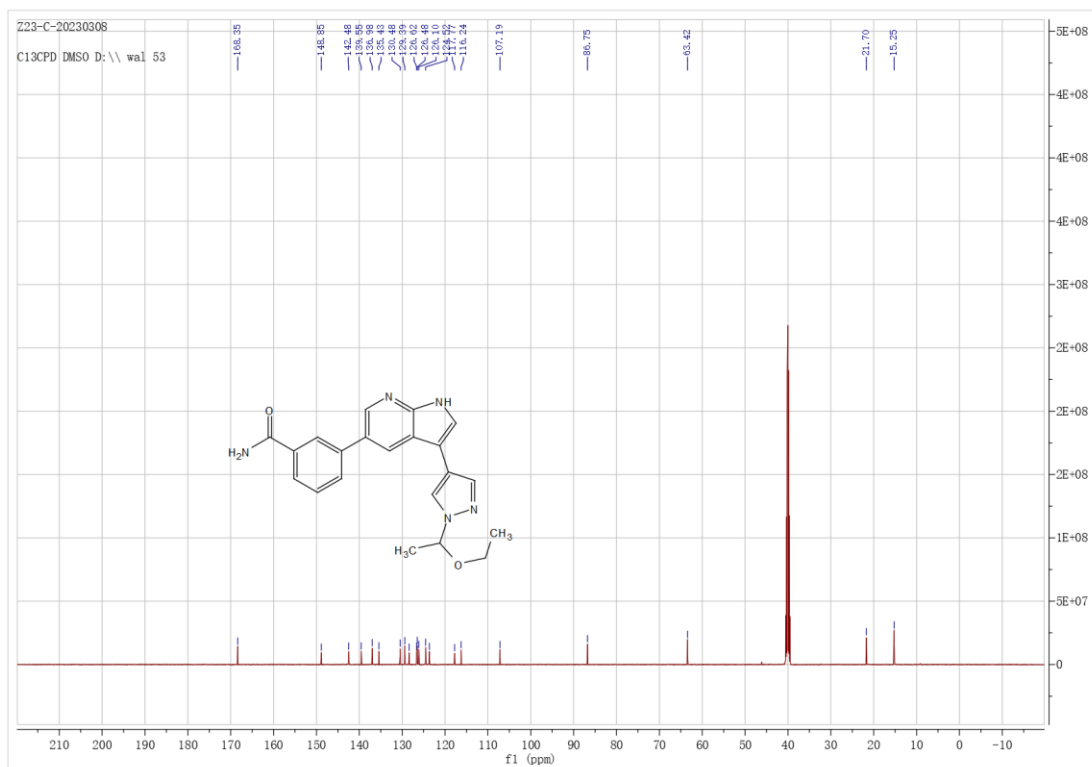



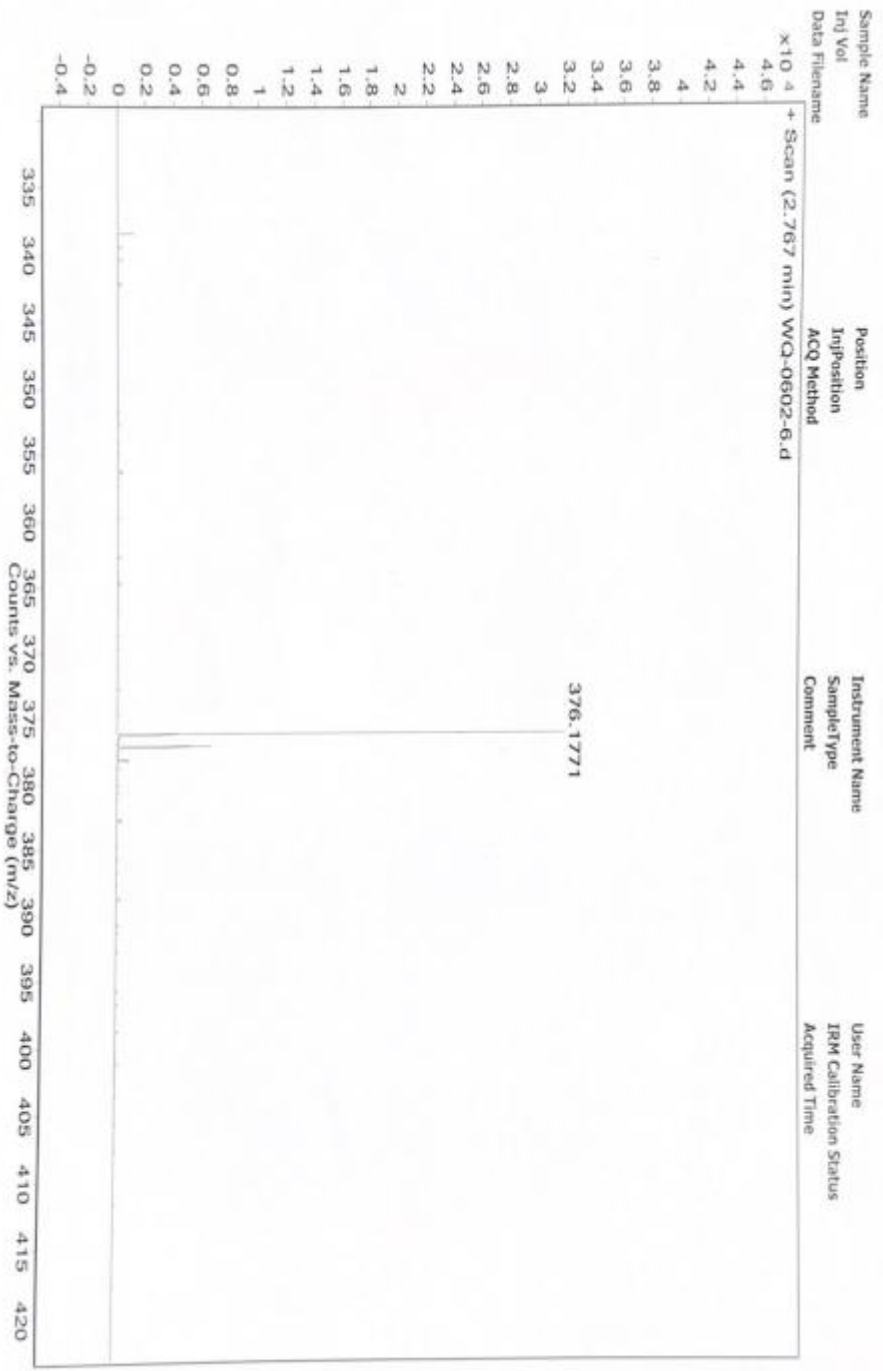



Sample Name  
Inj Vol  
Data Filename  
Position  
InjPosition  
ACQ Method  
Instrument Name  
SampleType  
Comment  
User Name  
IRM Calibration Status  
Acquired Time

x10 1 + Scan (1.236 min) WYM-2023-12.d

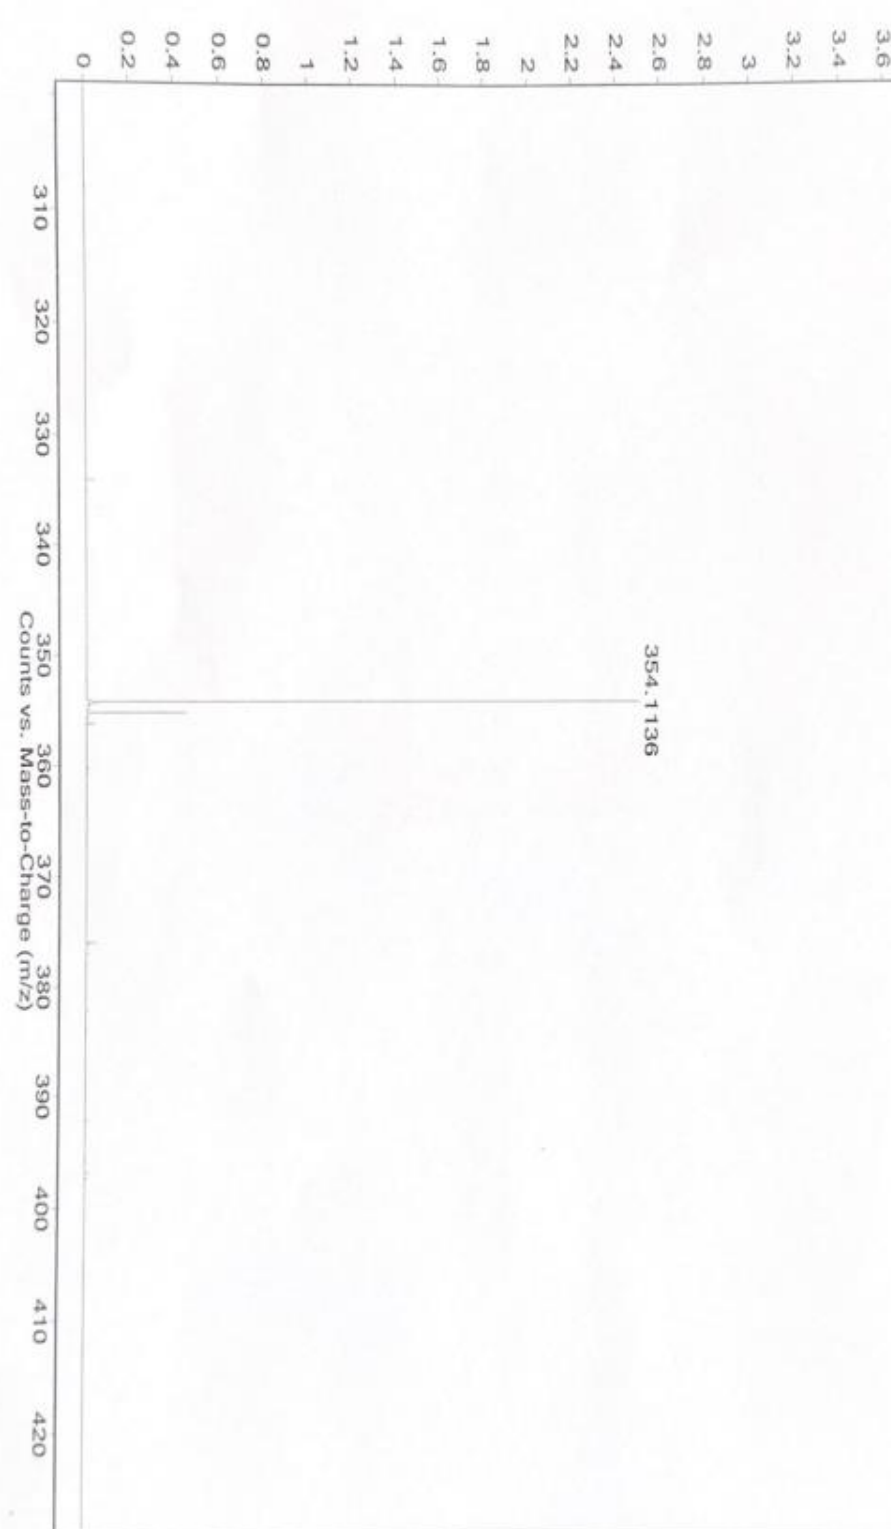

### 3-(3-phenyl-1H-pyrrolo[2,3-b]pyridin-5-yl)benzamide (19)

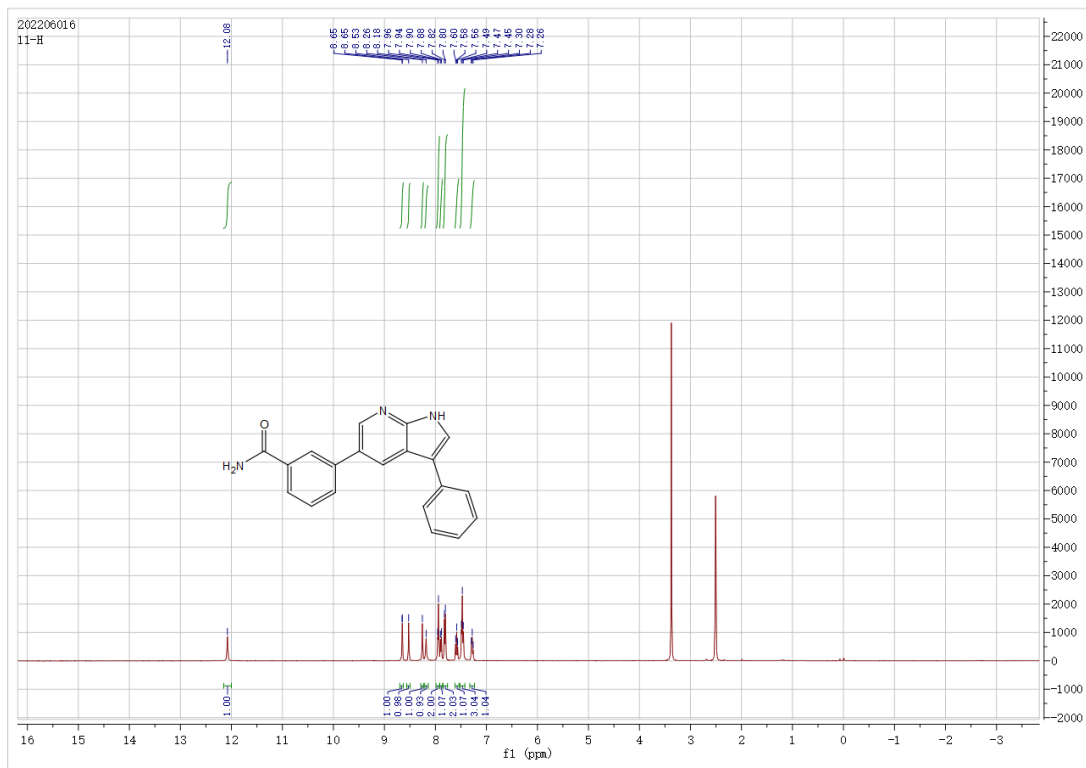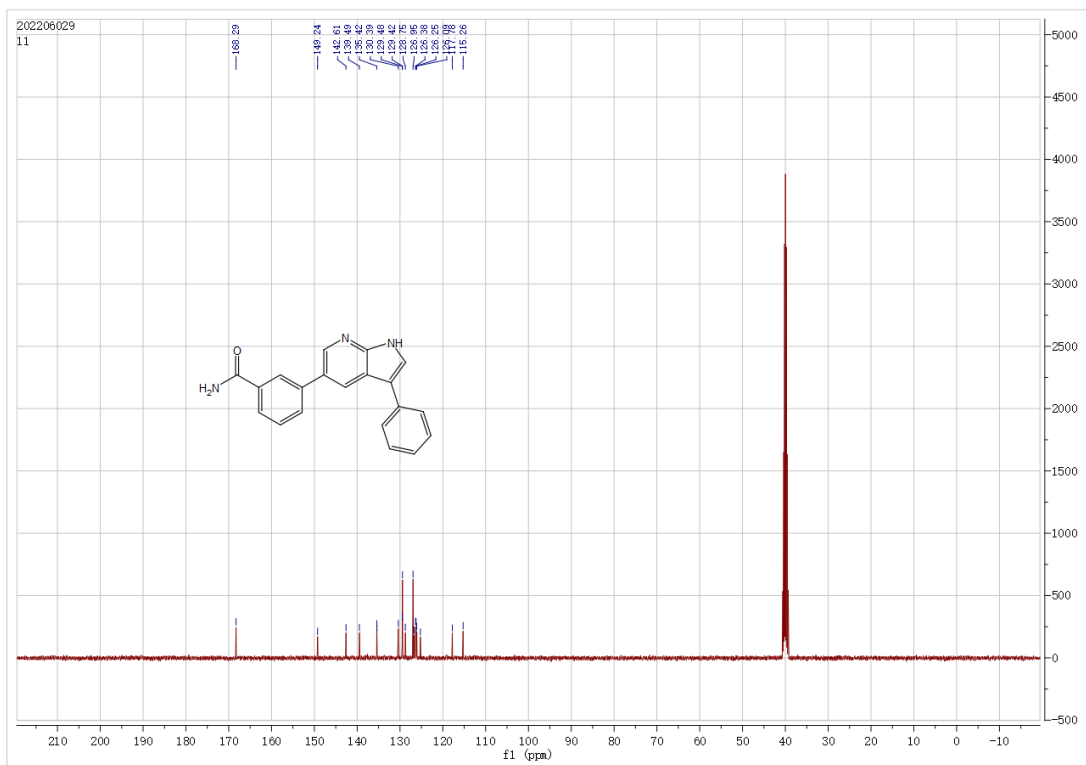



Z15-C-20230308  
C13CPD DMSO D:\ wa1 65

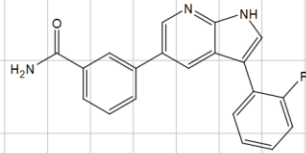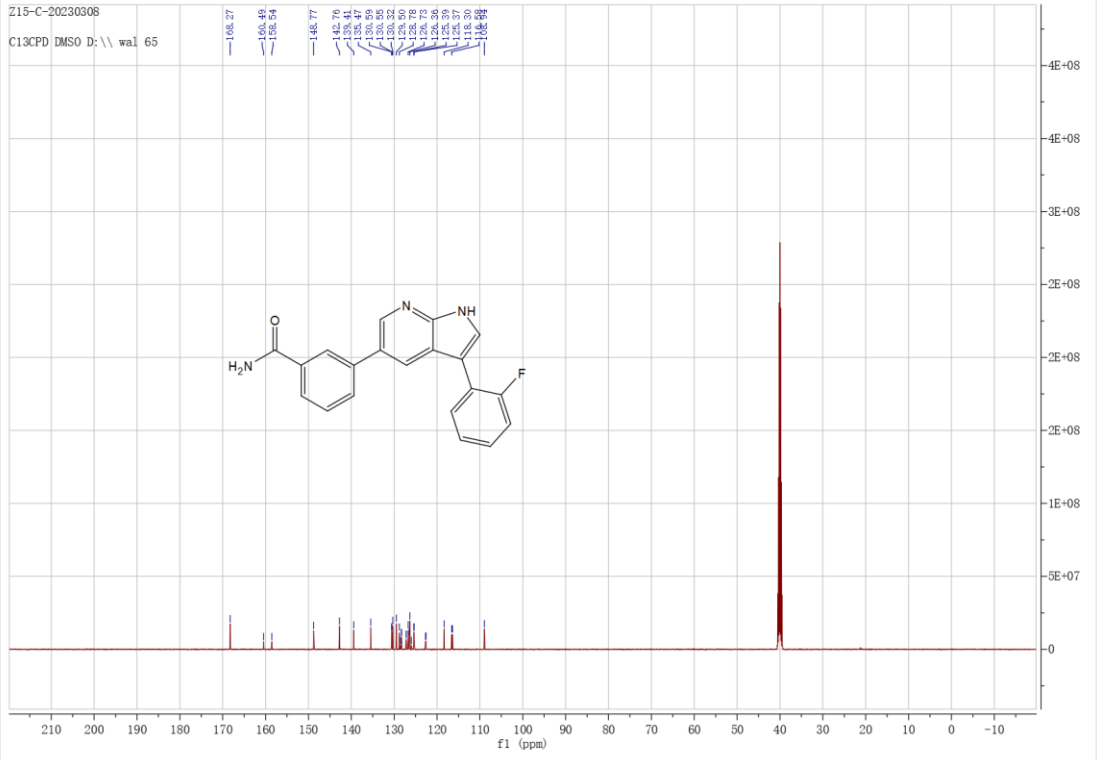

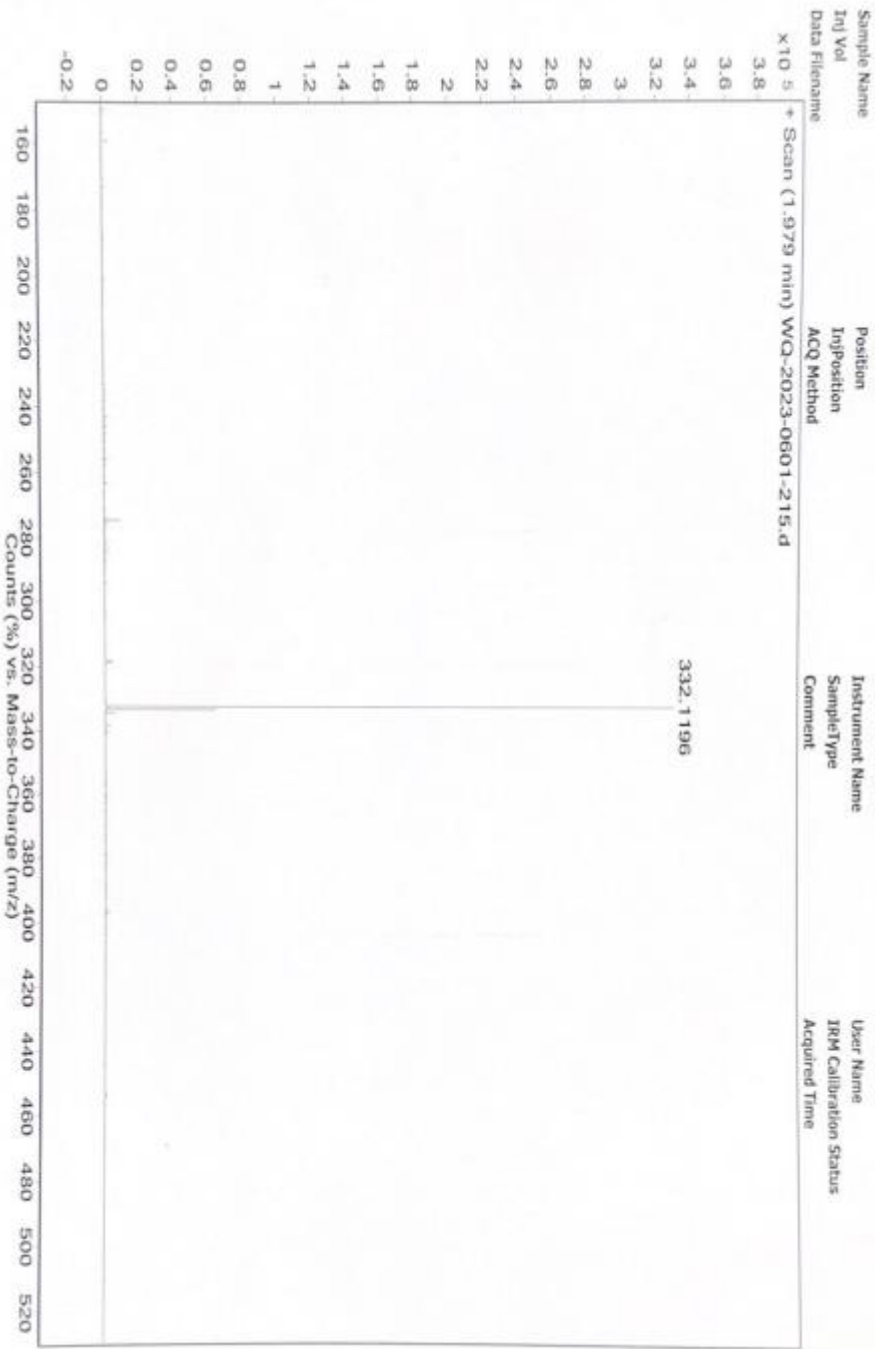

3-(3-(2-chlorophenyl)-1H-pyrrolo[2,3-b]pyridin-5-yl)benzamide (21)

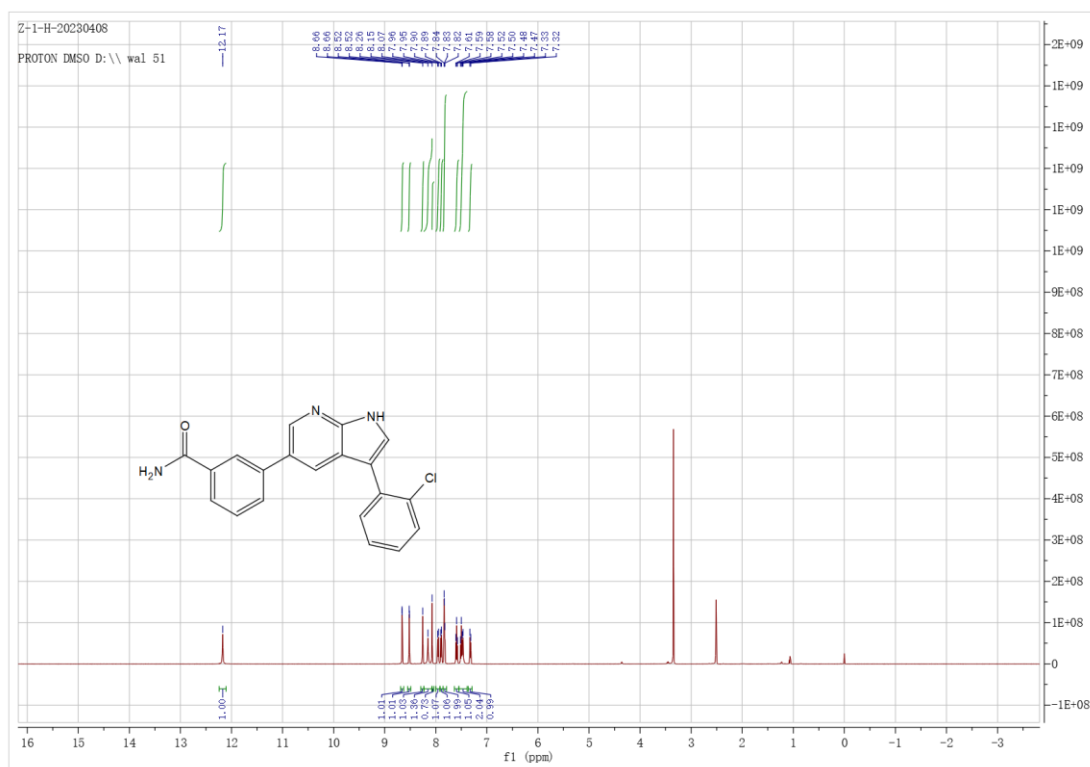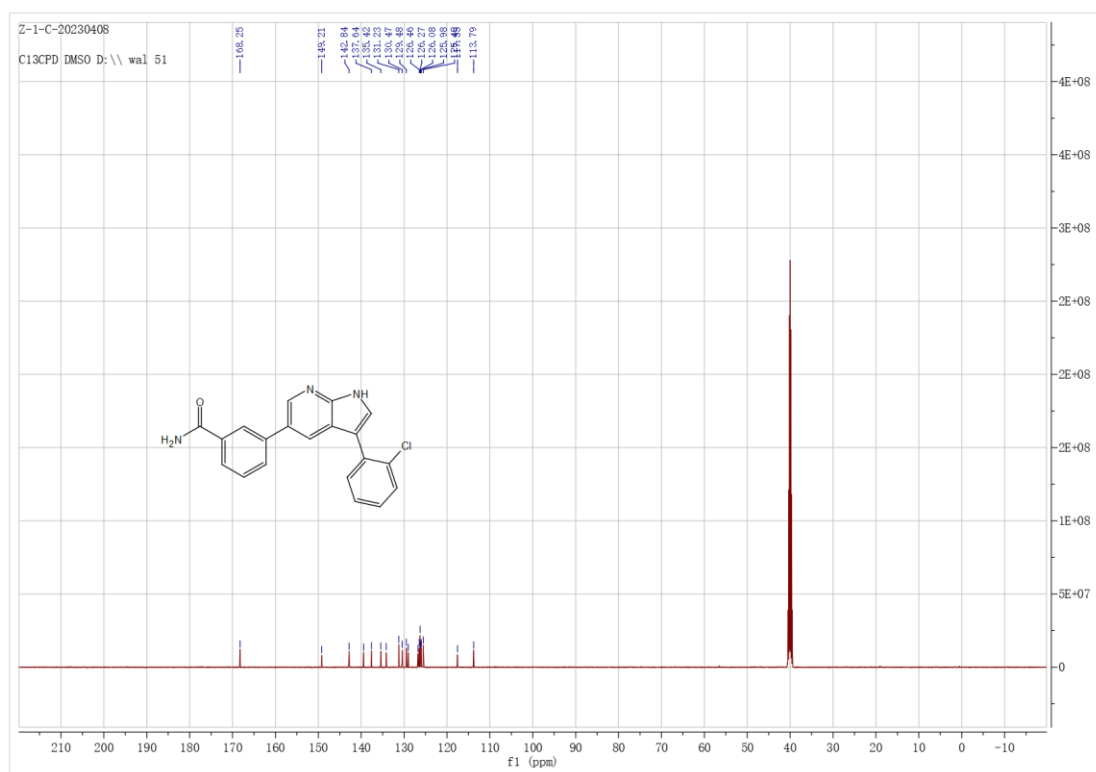



Sample Name  
Inj Vol  
Data Filename  
Position  
InjPosition  
ACQ Method  
Instrument Name  
SampleType  
Comment  
User Name  
IPM Calibration Status  
Acquired Time

+ Scan (2.068 min) WQ-2023-0601-27.d

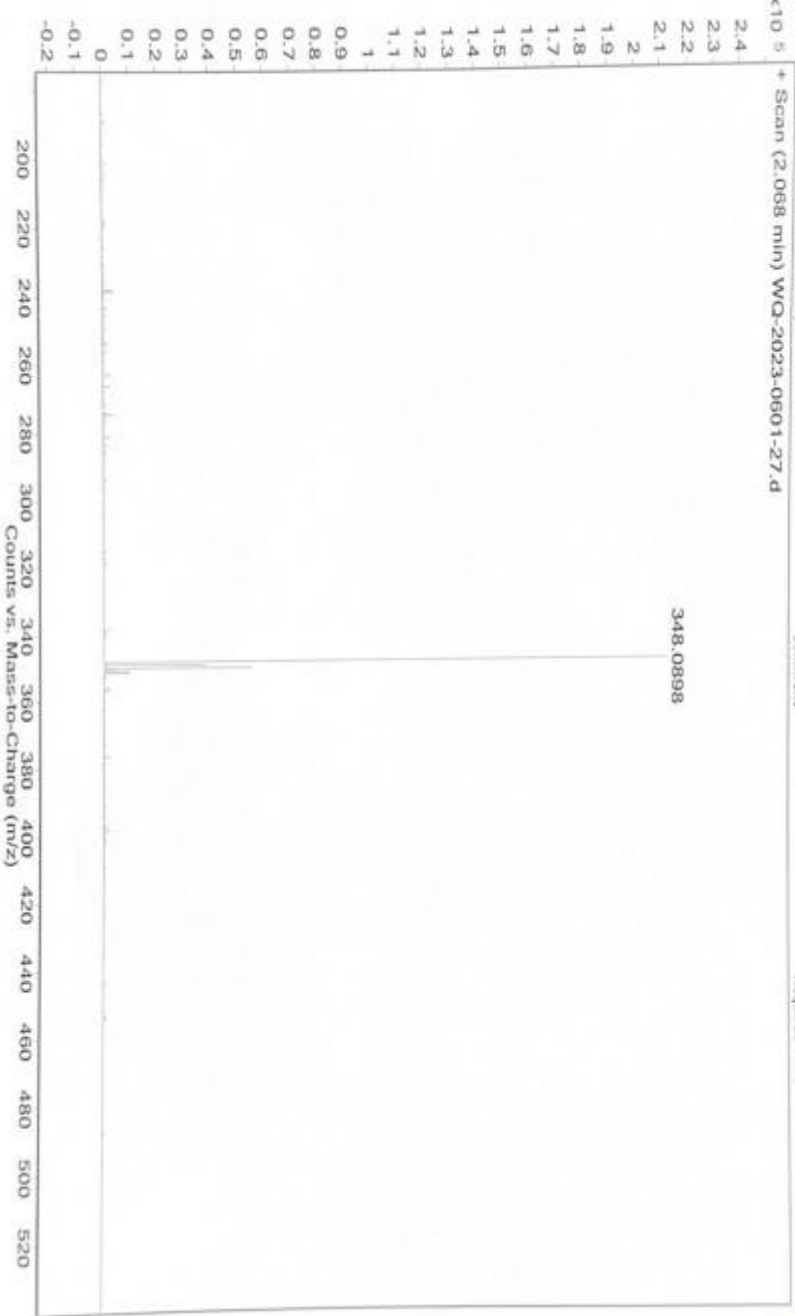

Counts vs. Mass-to-Charge (m/z)



Sample Name  
Inj Vol  
Data Filename

Position  
InjPosition  
Acq Method

Instrument Name  
SampleType  
Comment

User Name  
IRM Calibration Status  
Acquired Time

x10 1 + Scan (5.178 min) WYM-2023-11.D

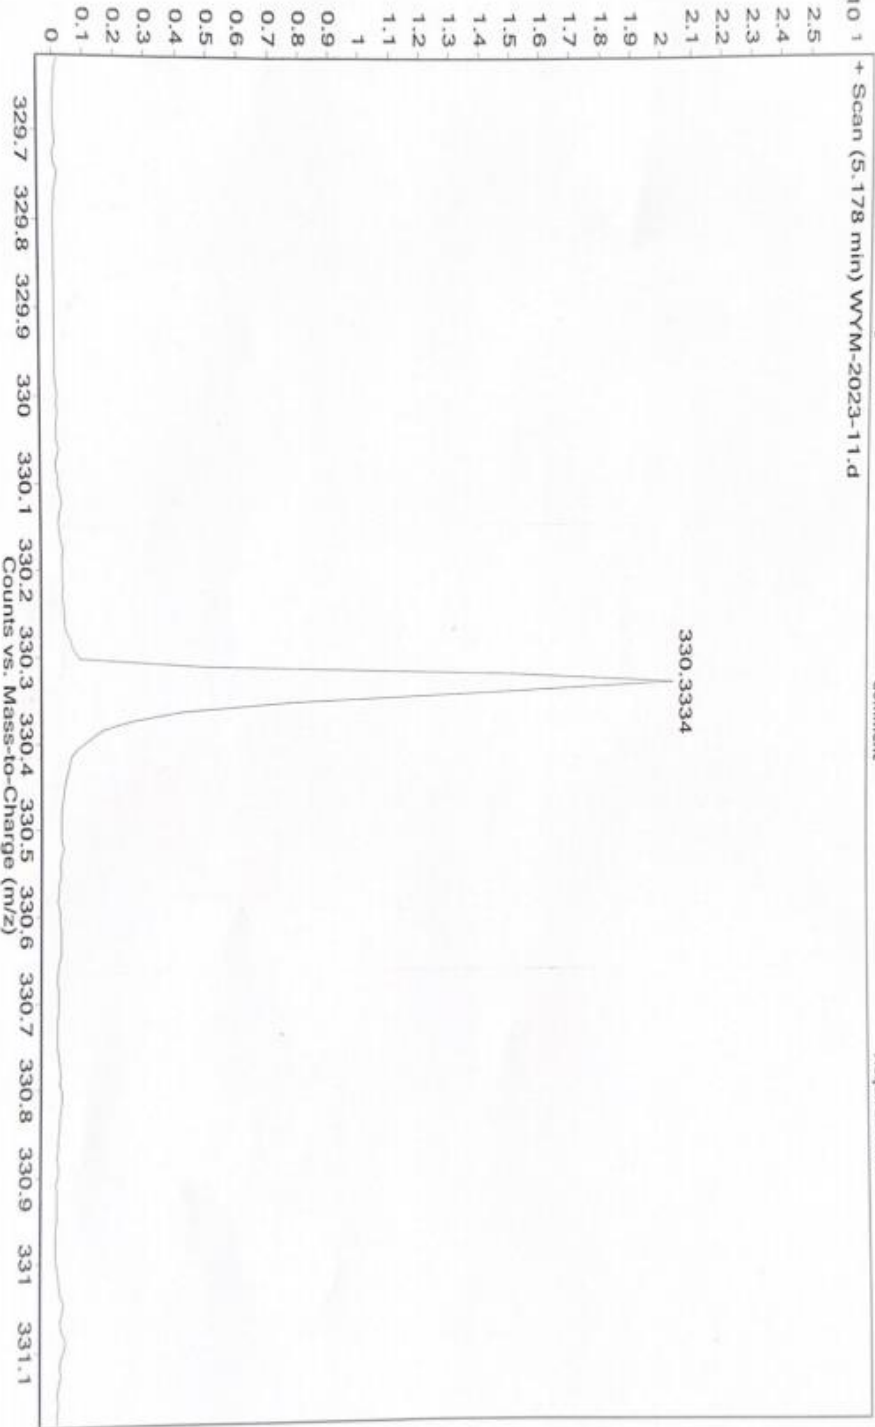

329.7 329.8 329.9 330 330.1 330.2 330.3 330.4 330.5 330.6 330.7 330.8 330.9 331 331.1  
Counts vs. Mass-to-Charge (m/z)

3-(3-(*o*-tolyl)-1*H*-pyrrolo[2,3-*b*]pyridin-5-yl)benzamide (**23**)

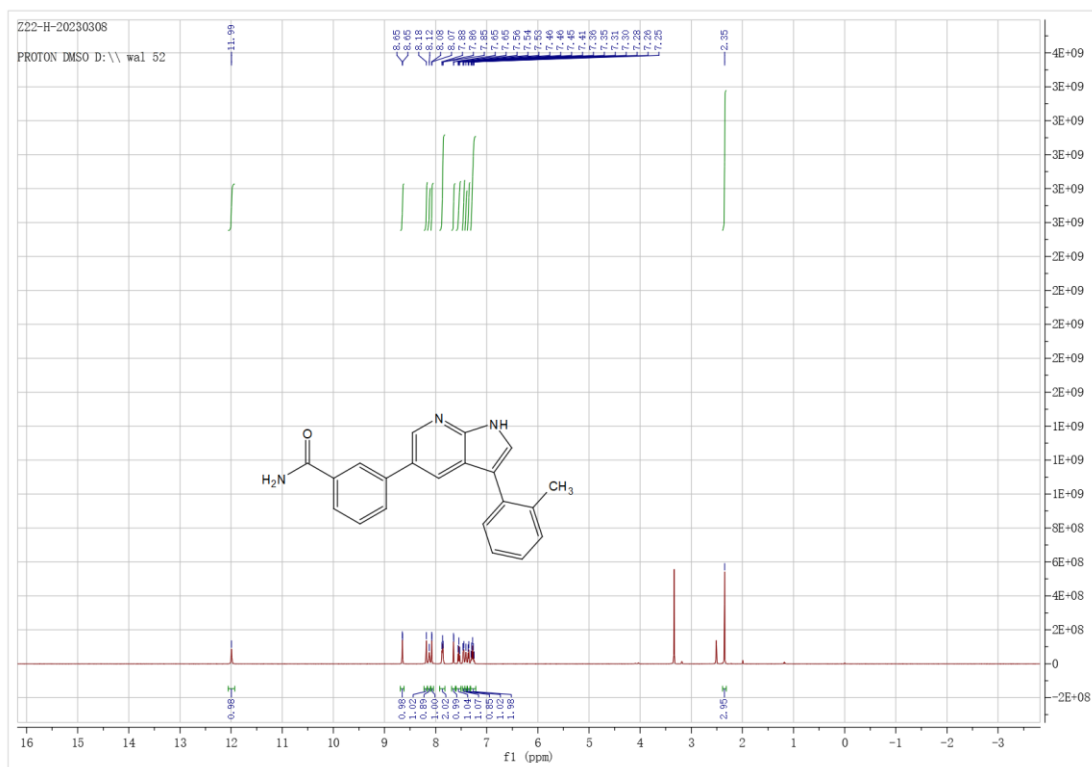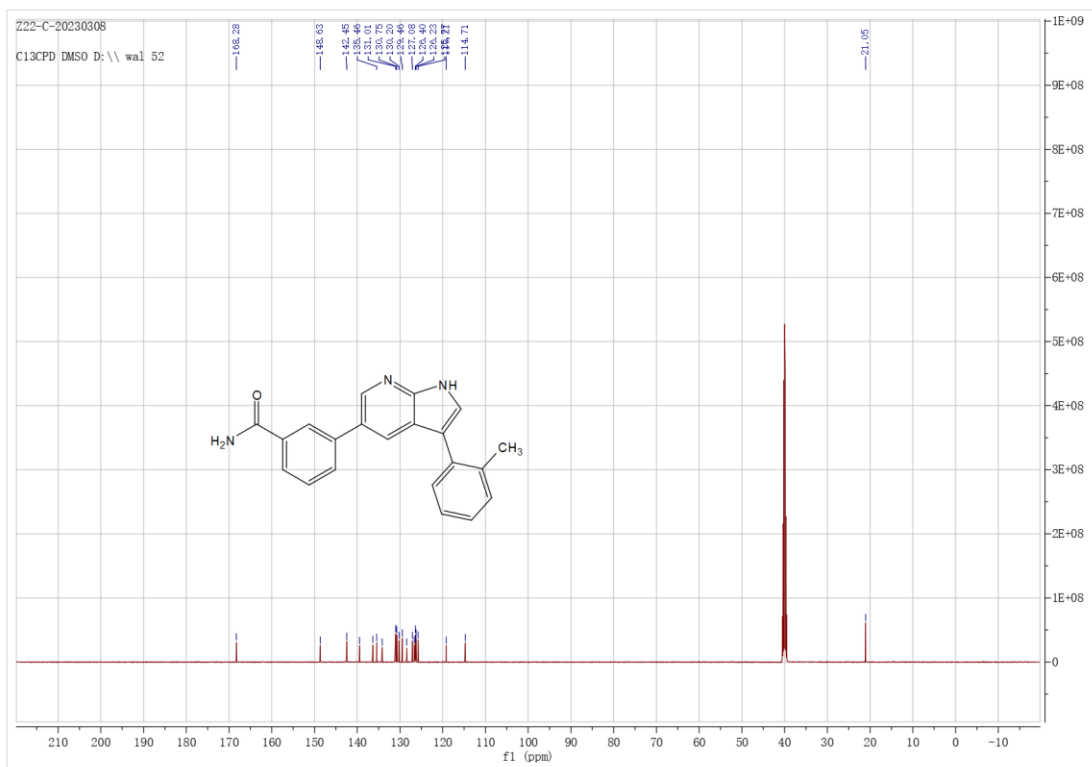

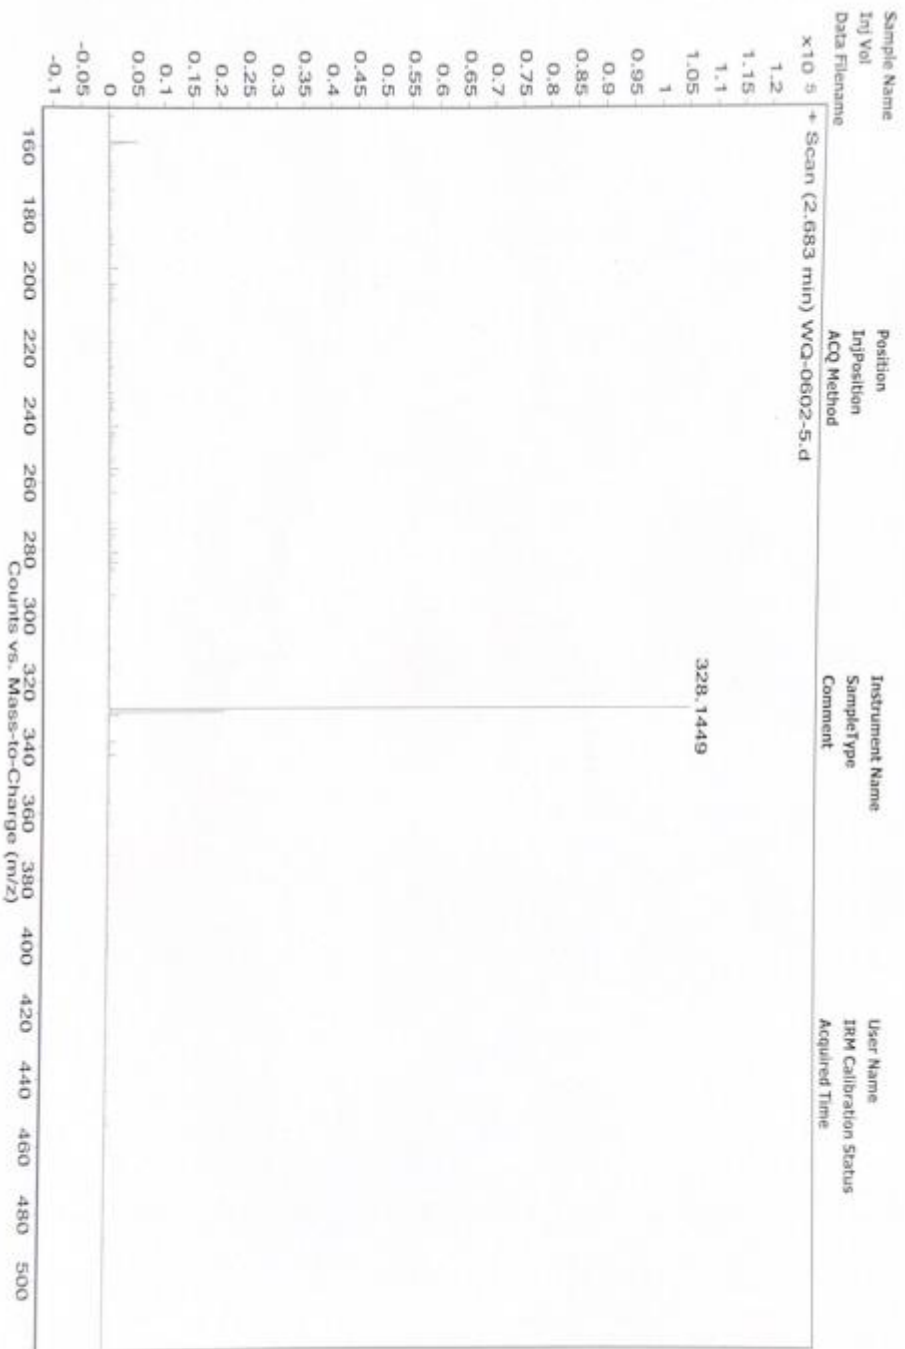

3-(3-(2-ethylphenyl)-1H-pyrrolo[2,3-b]pyridin-5-yl)benzamide (24)

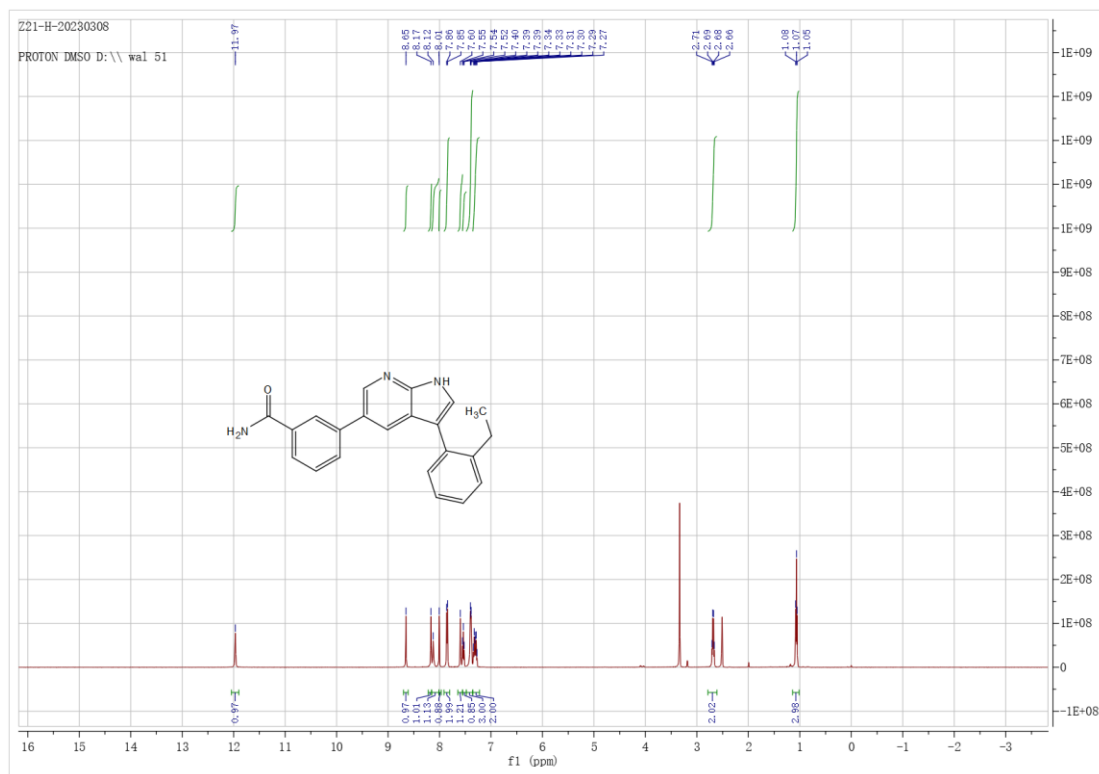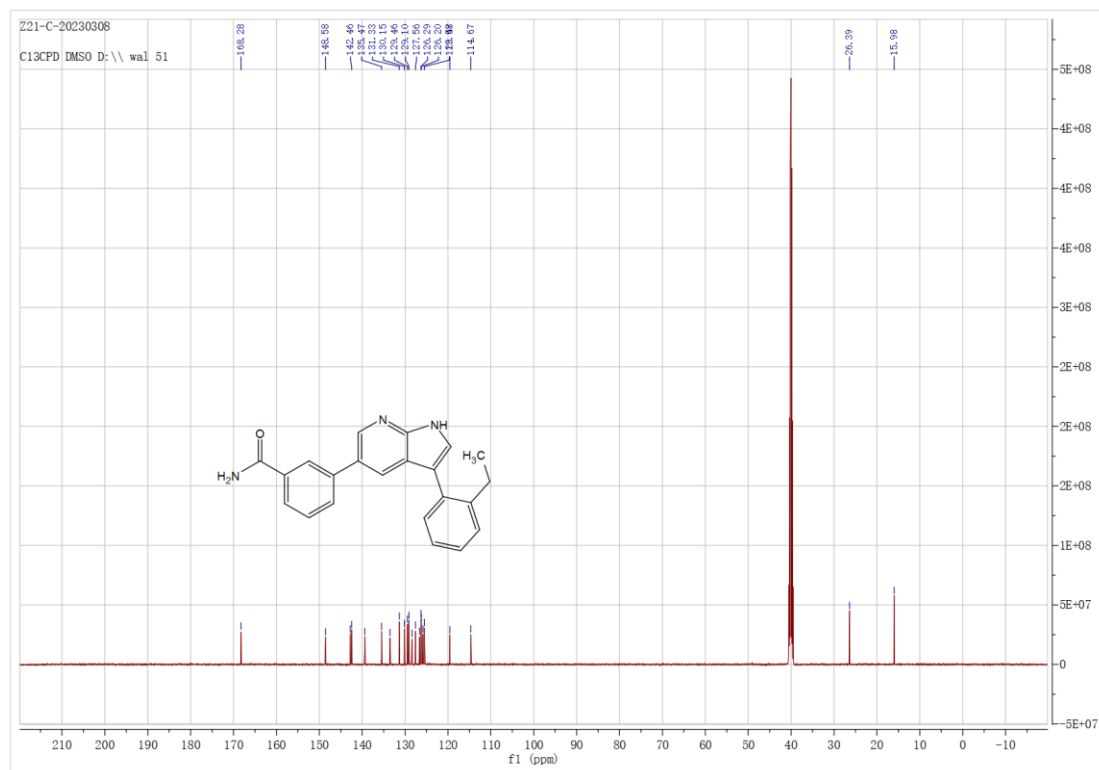

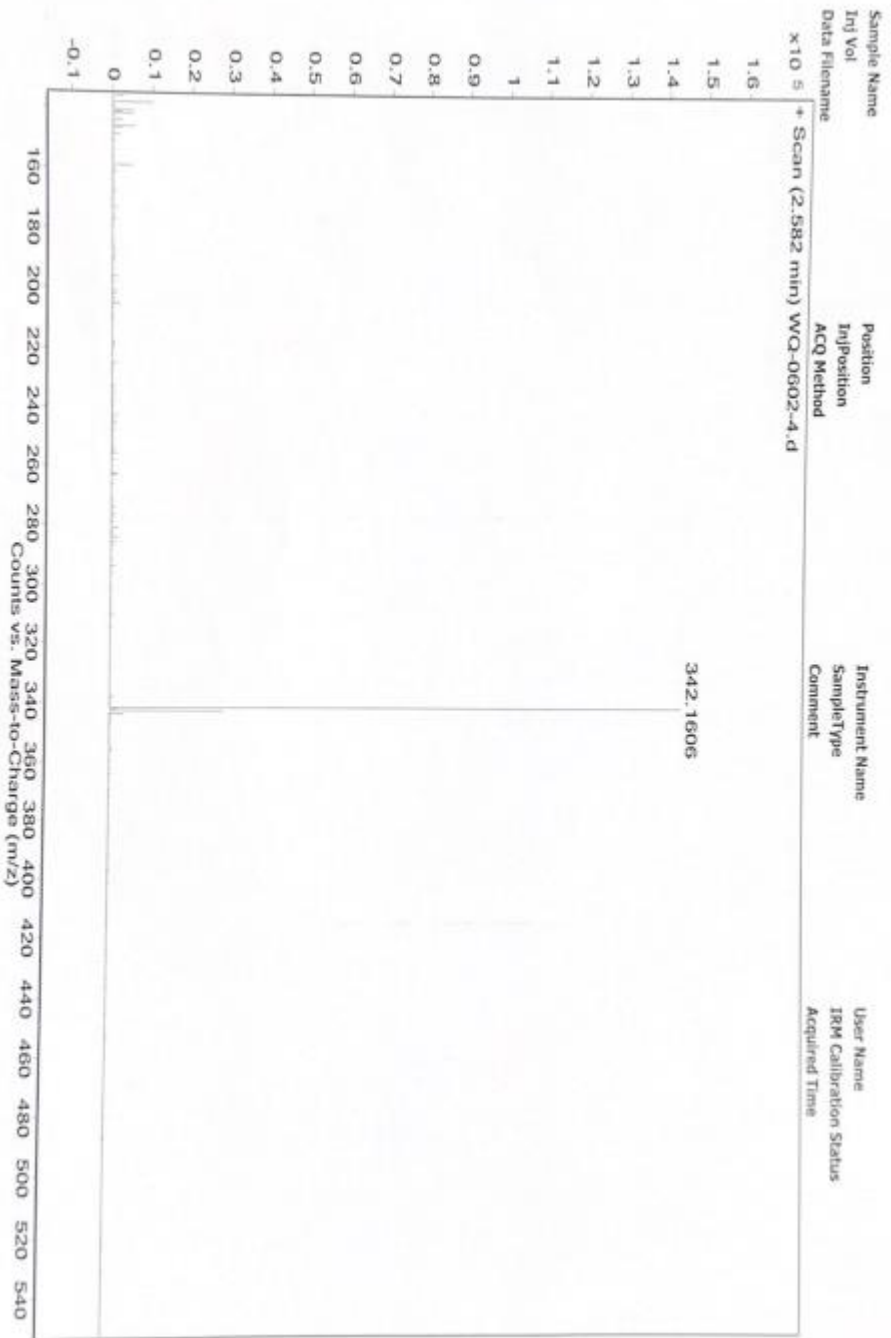





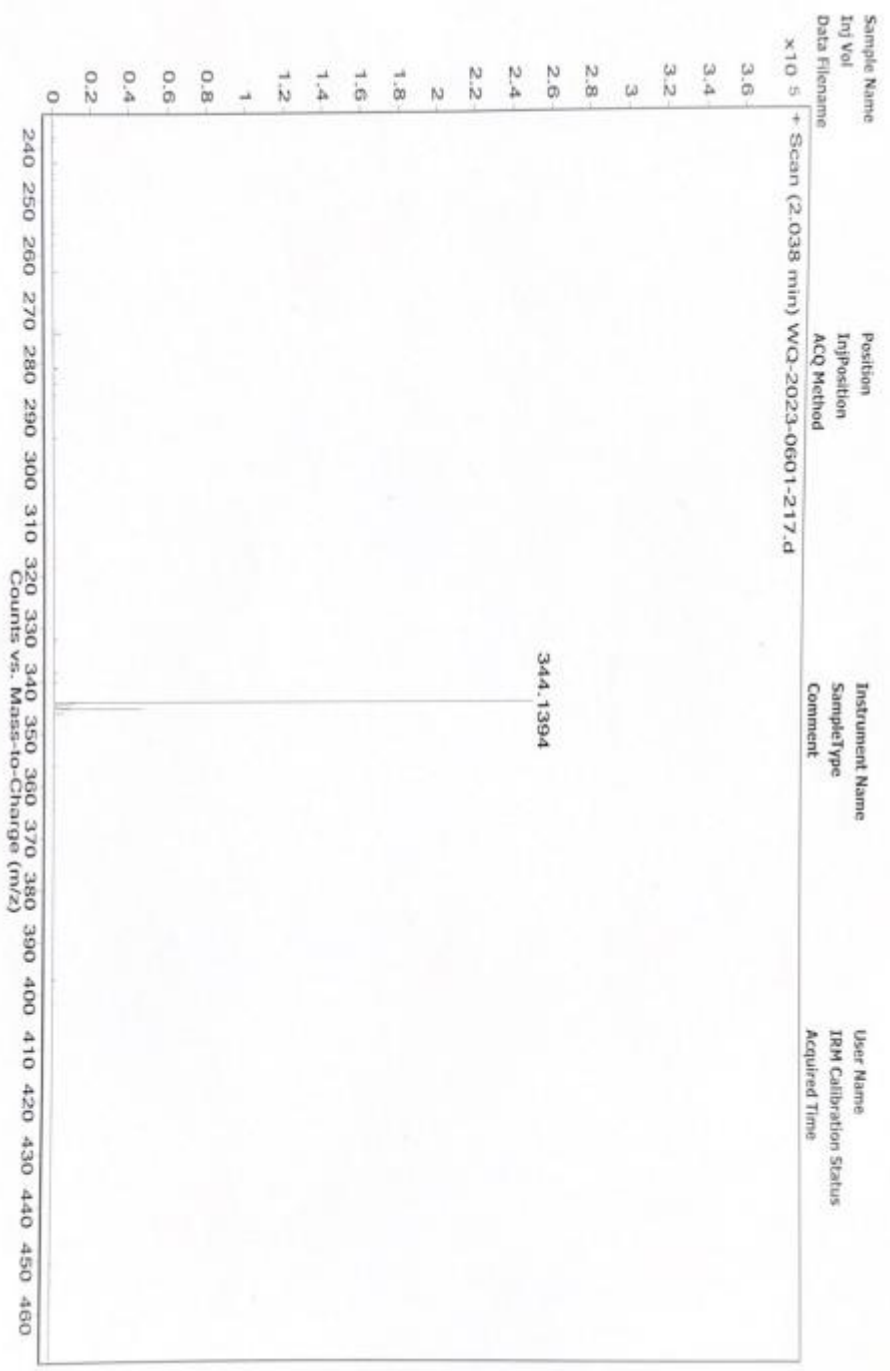



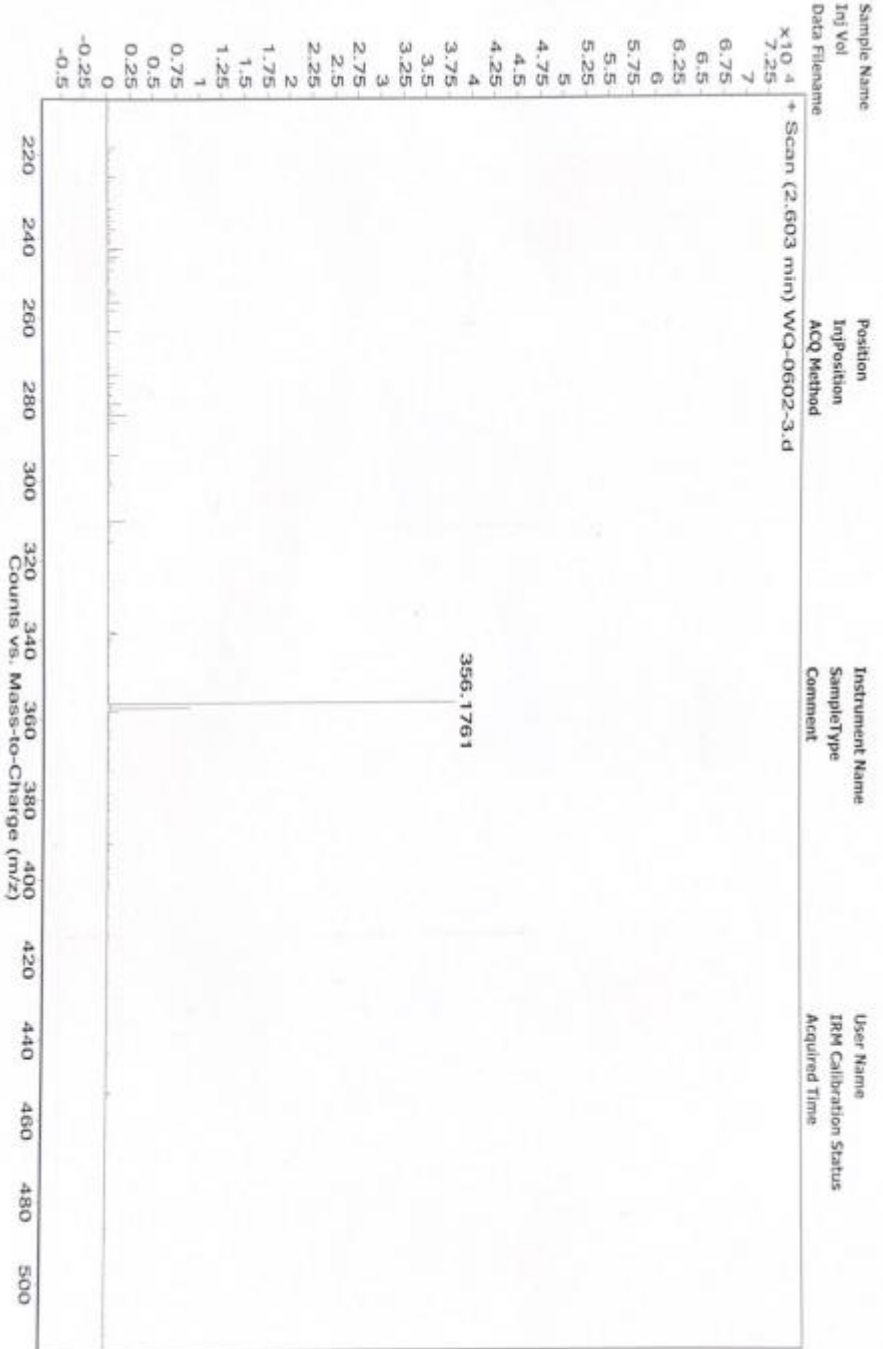

3-(3-(2-(trifluoromethyl)phenyl)-1H-pyrrolo[2,3-b]pyridin-5-yl)benzamide (27)

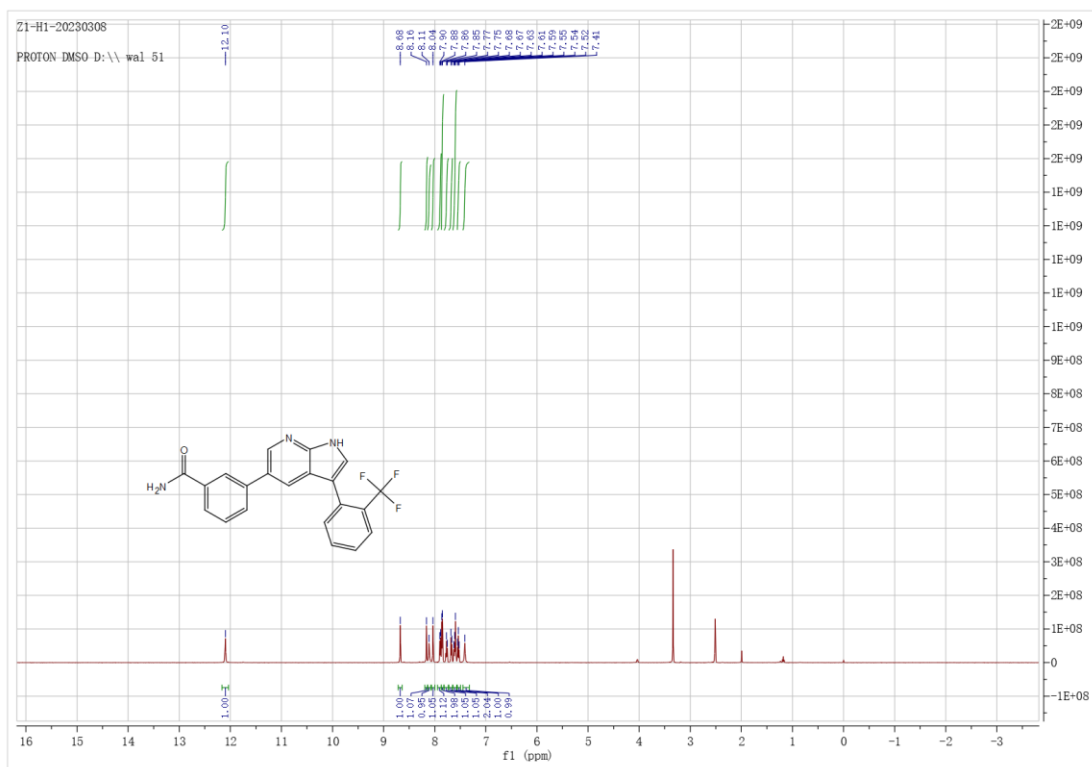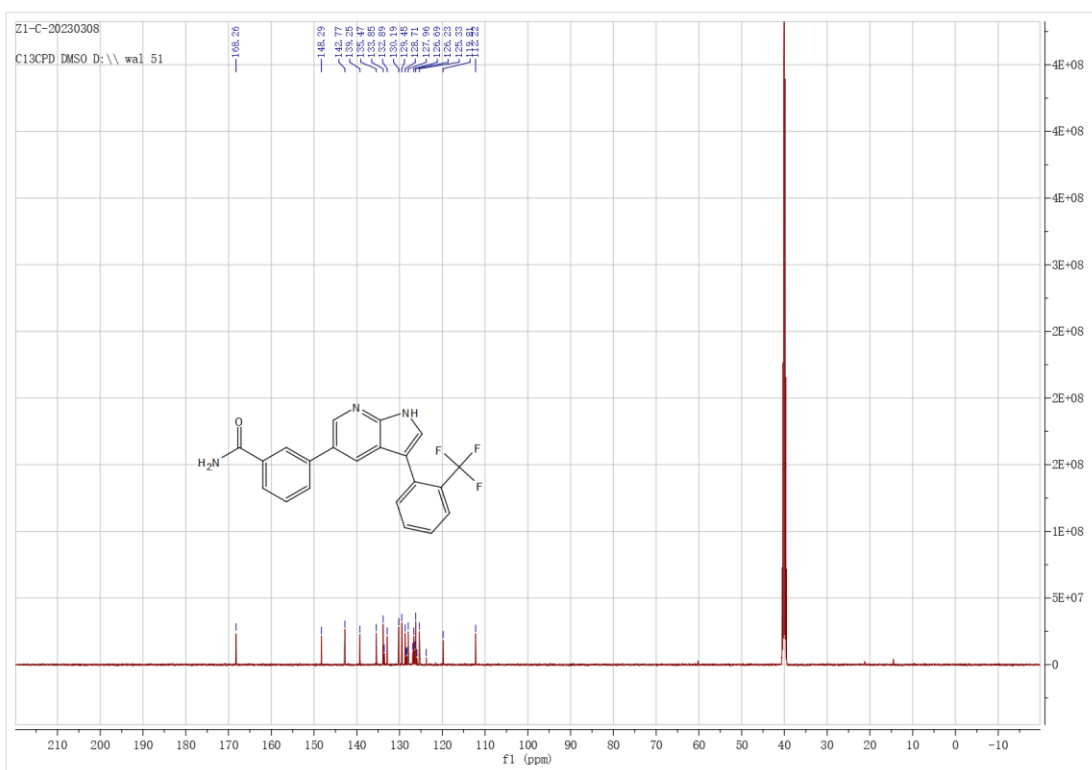

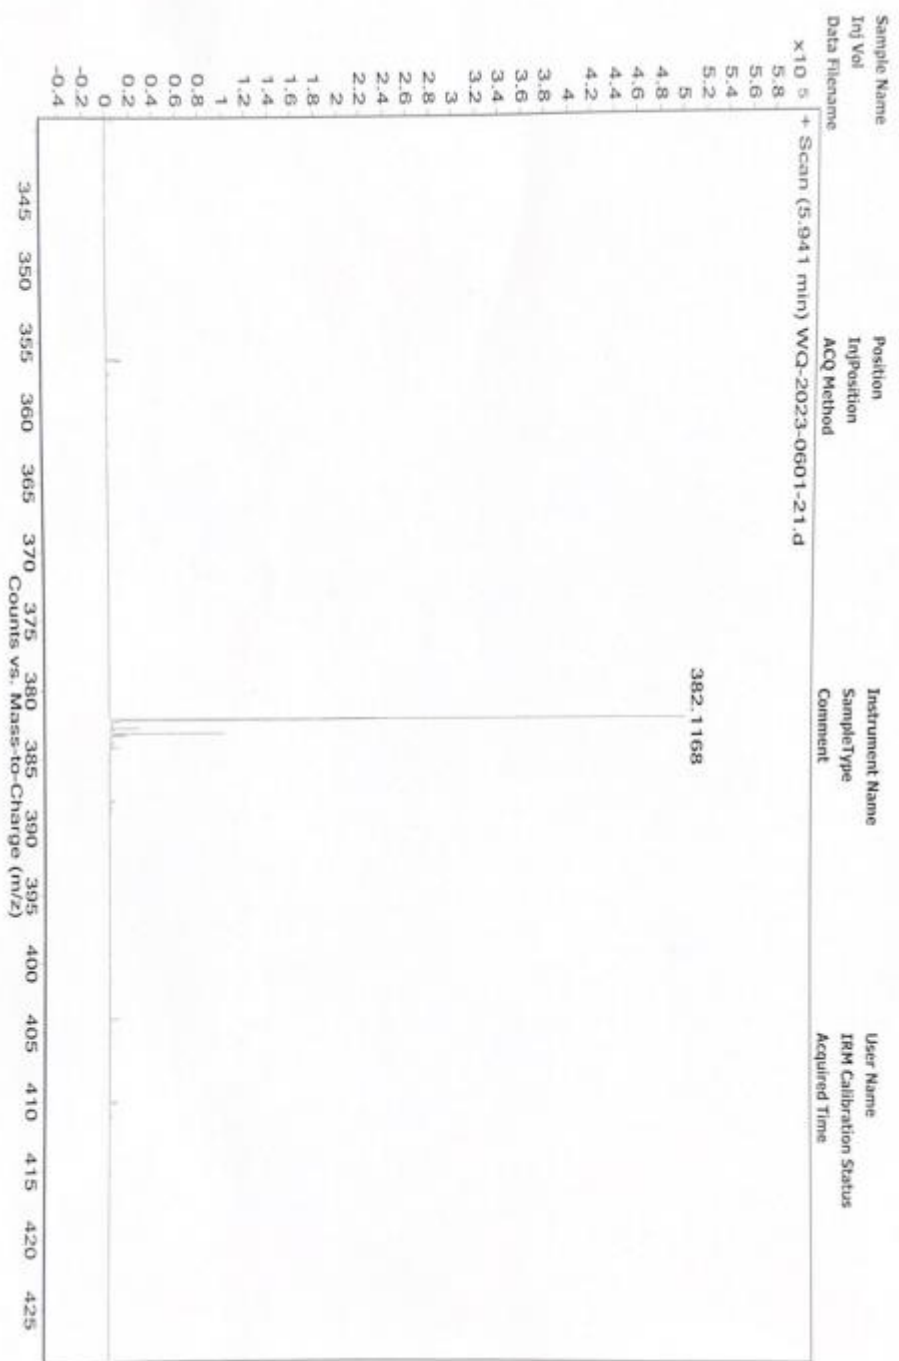

3-(3-(2-(trifluoromethoxy)phenyl)-1H-pyrrolo[2,3-b]pyridin-5-yl)benzamide (28)

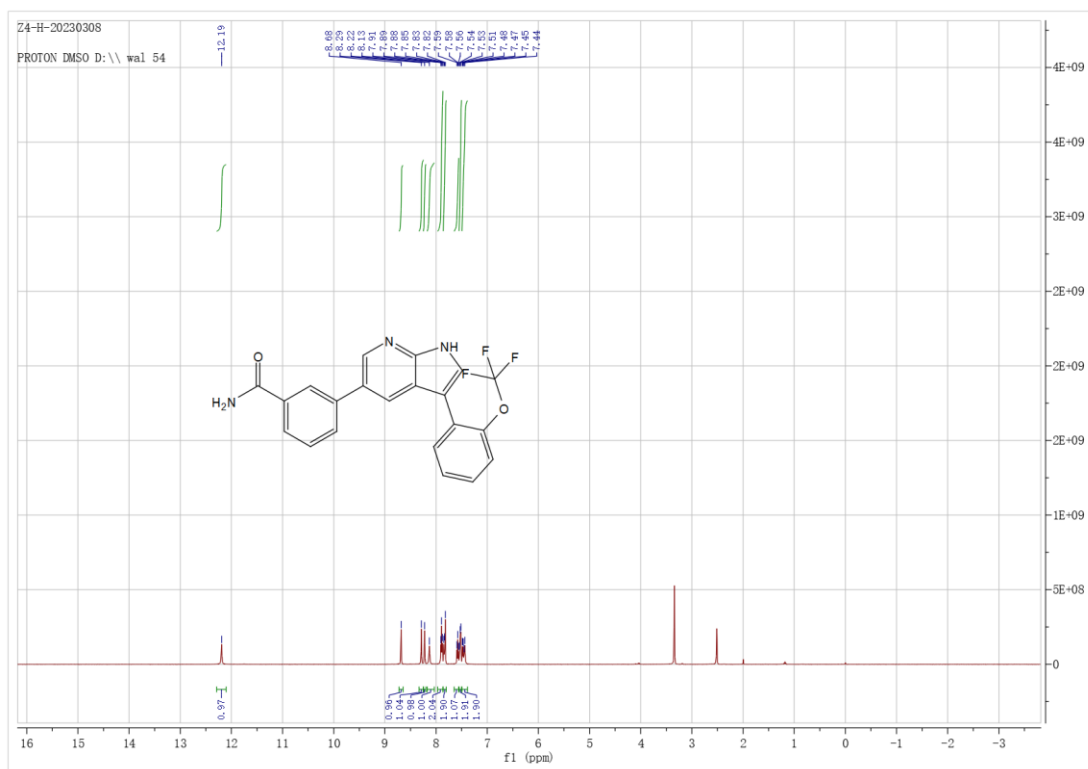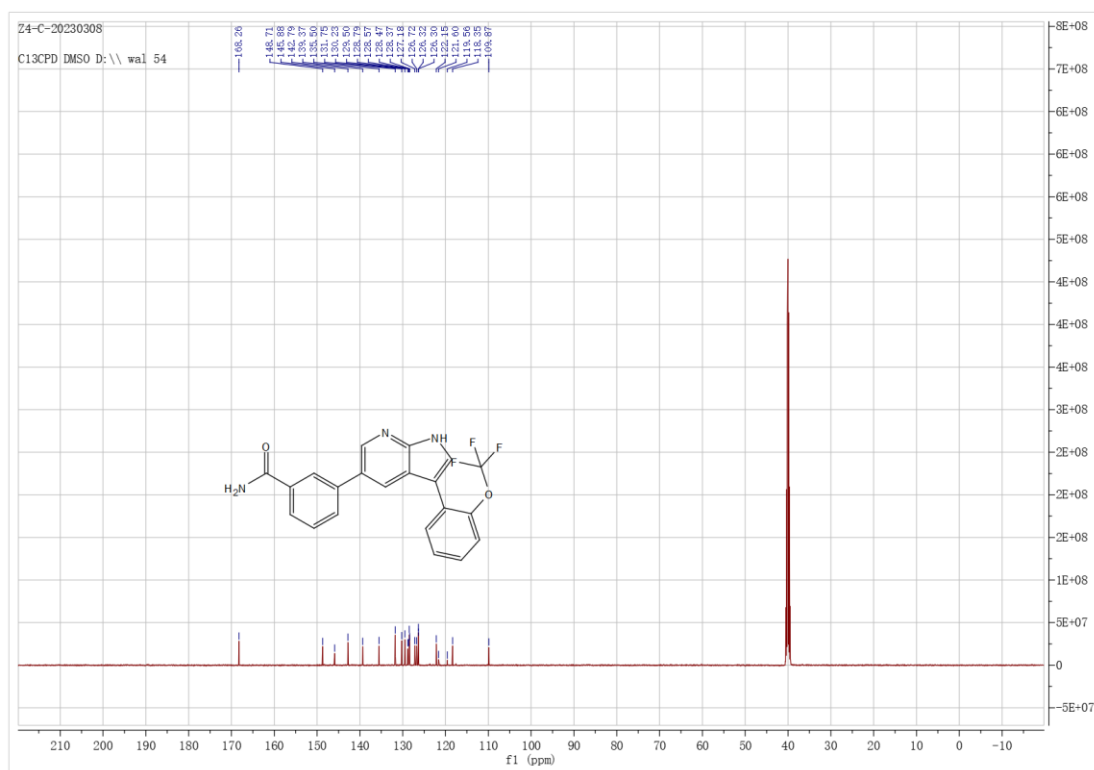

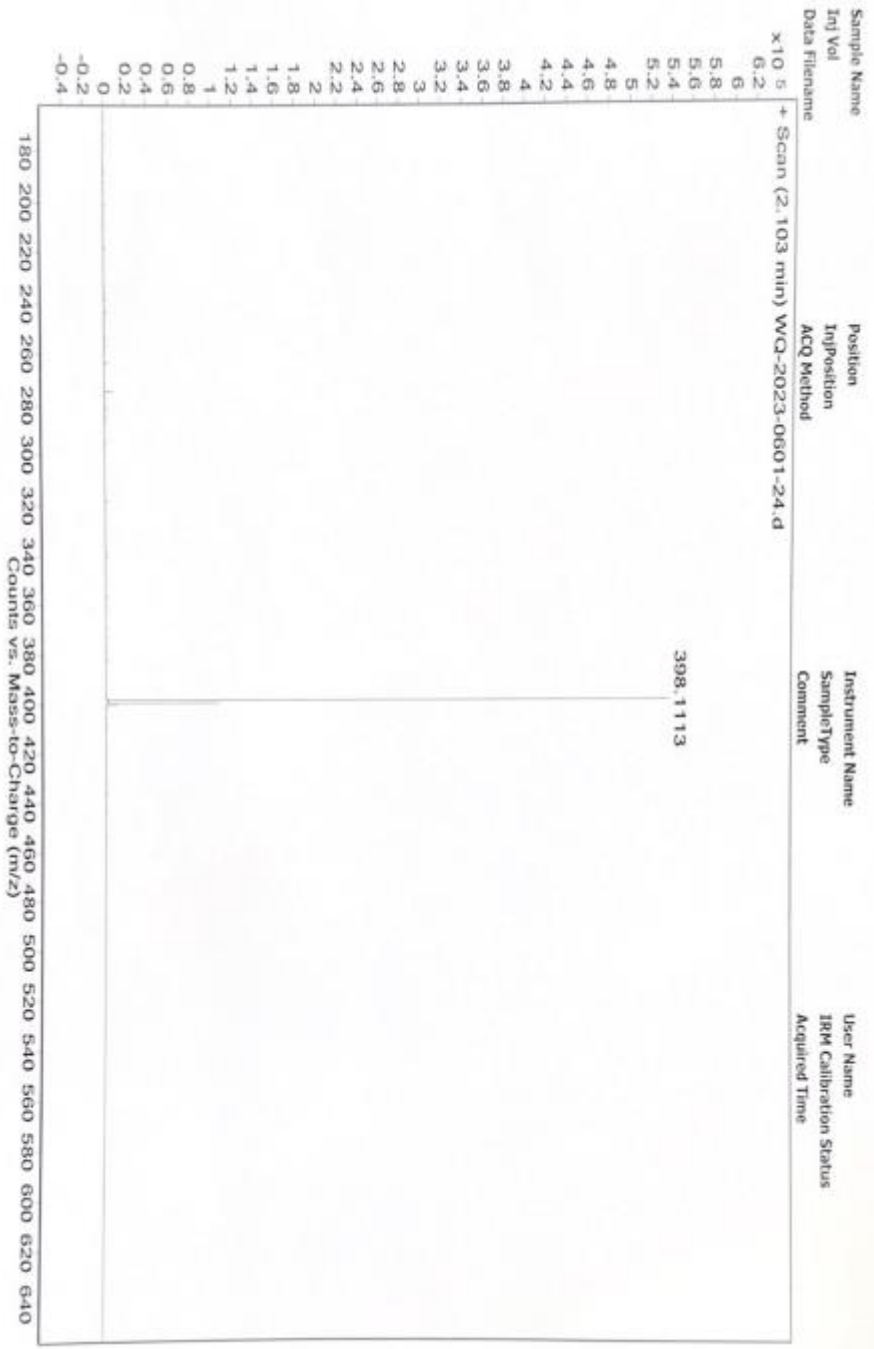





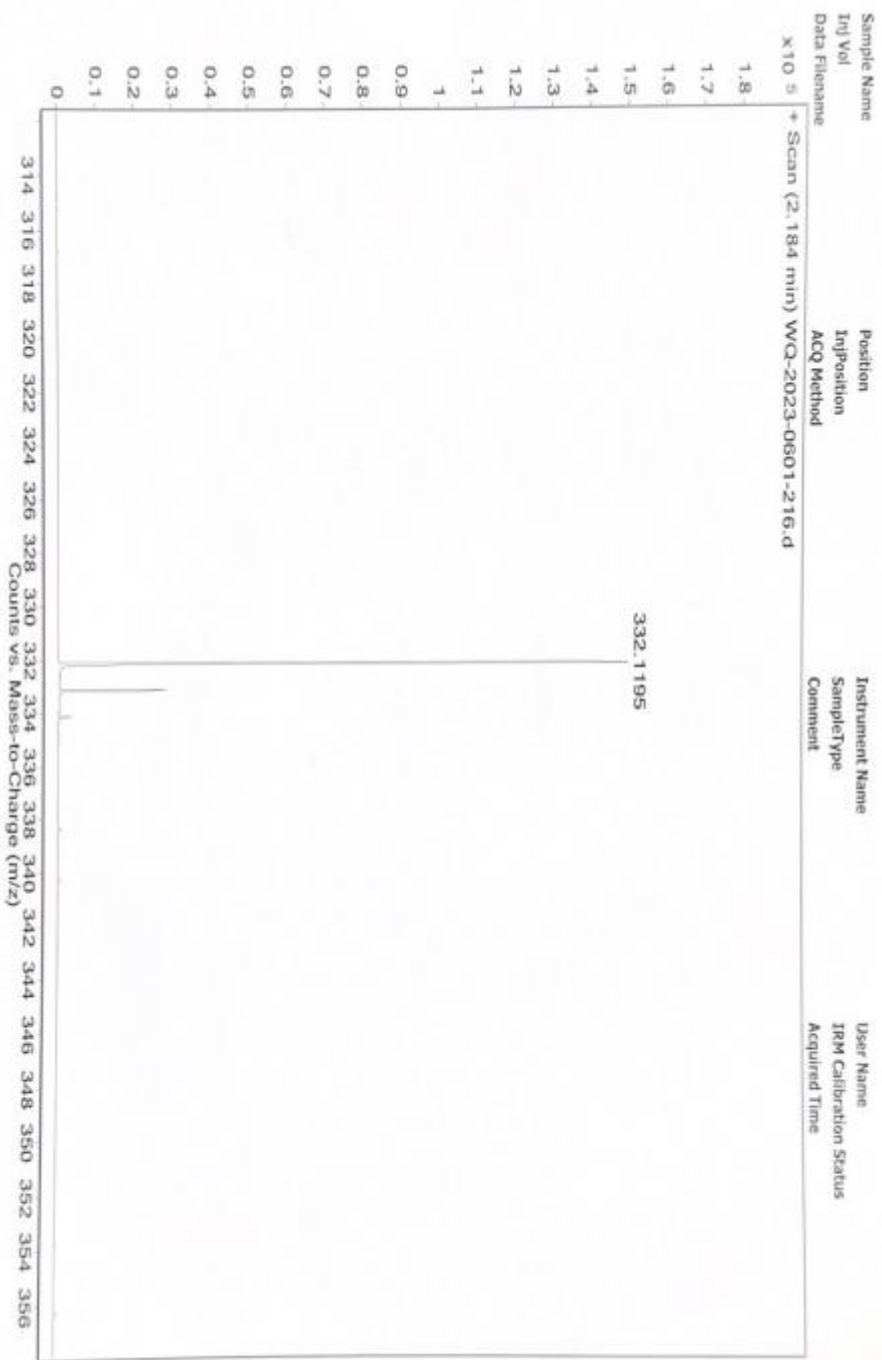



Sample Name  
Inj Vol  
Data Filename  
Position  
Injection  
ACQ Method  
Instrument Name  
Sample Type  
Comment  
User Name  
IRM Calibration Status  
Acquired Time

x10 5 + Scan (2.053 min) WQ-2023-0901-28.d

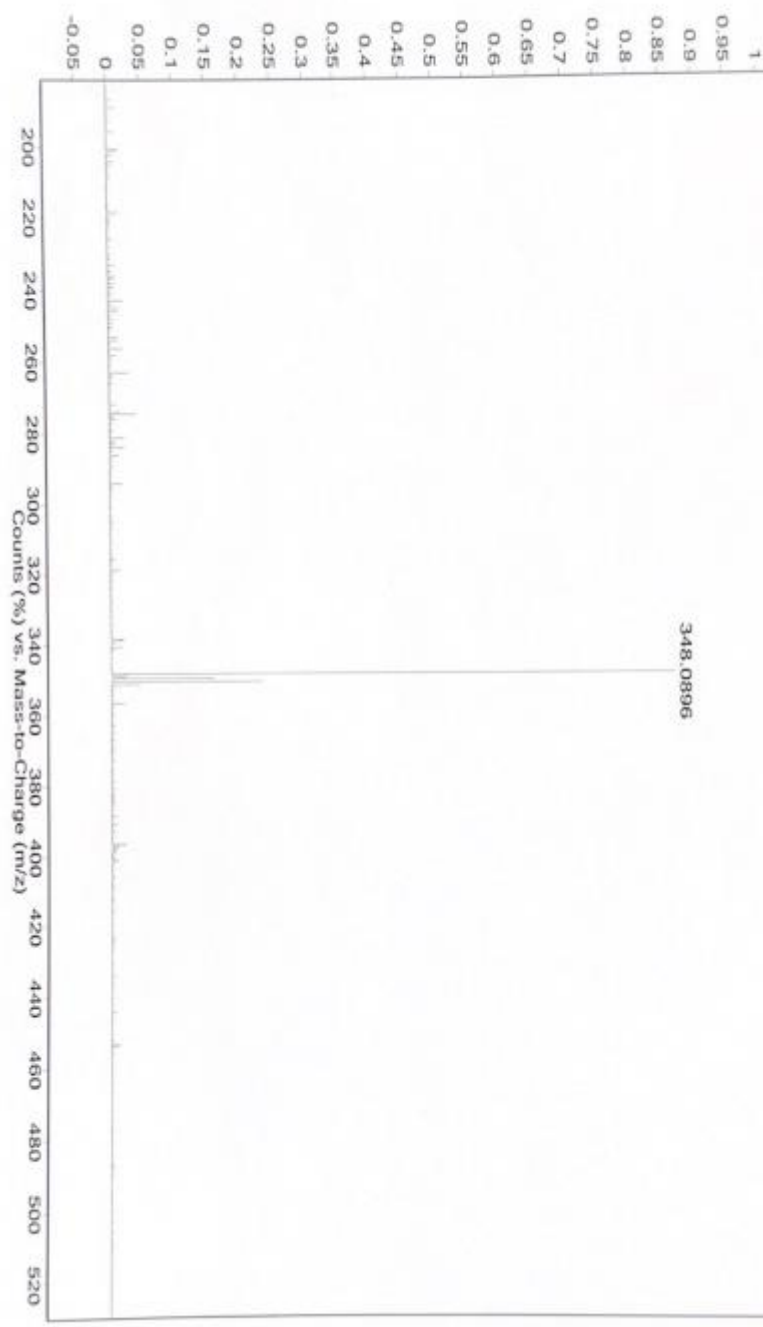

3-(3-(3-hydroxyphenyl)-1H-pyrrolo[2,3-b]pyridin-5-yl)benzamide (31)

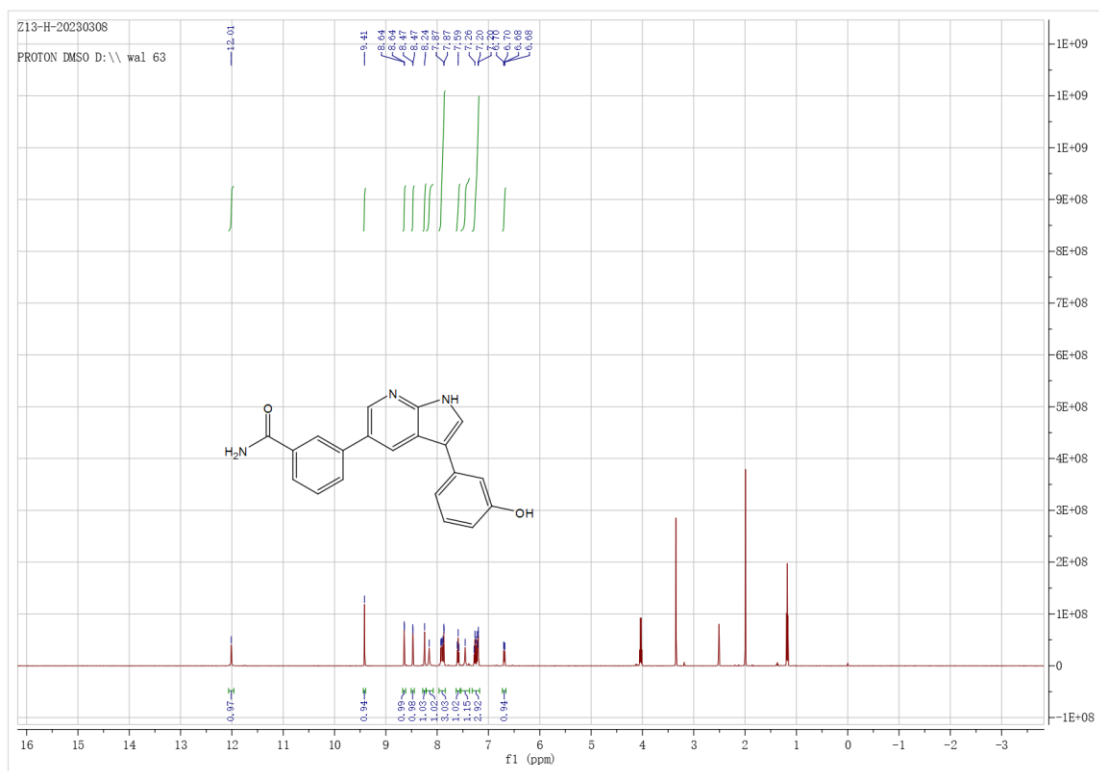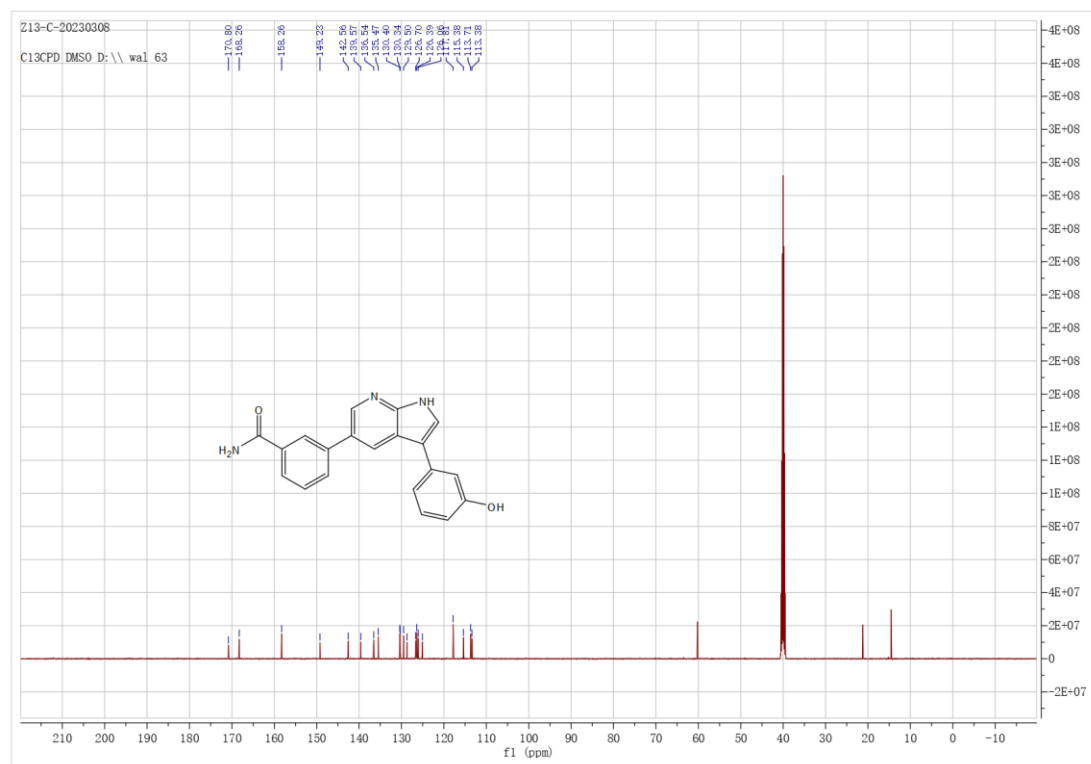

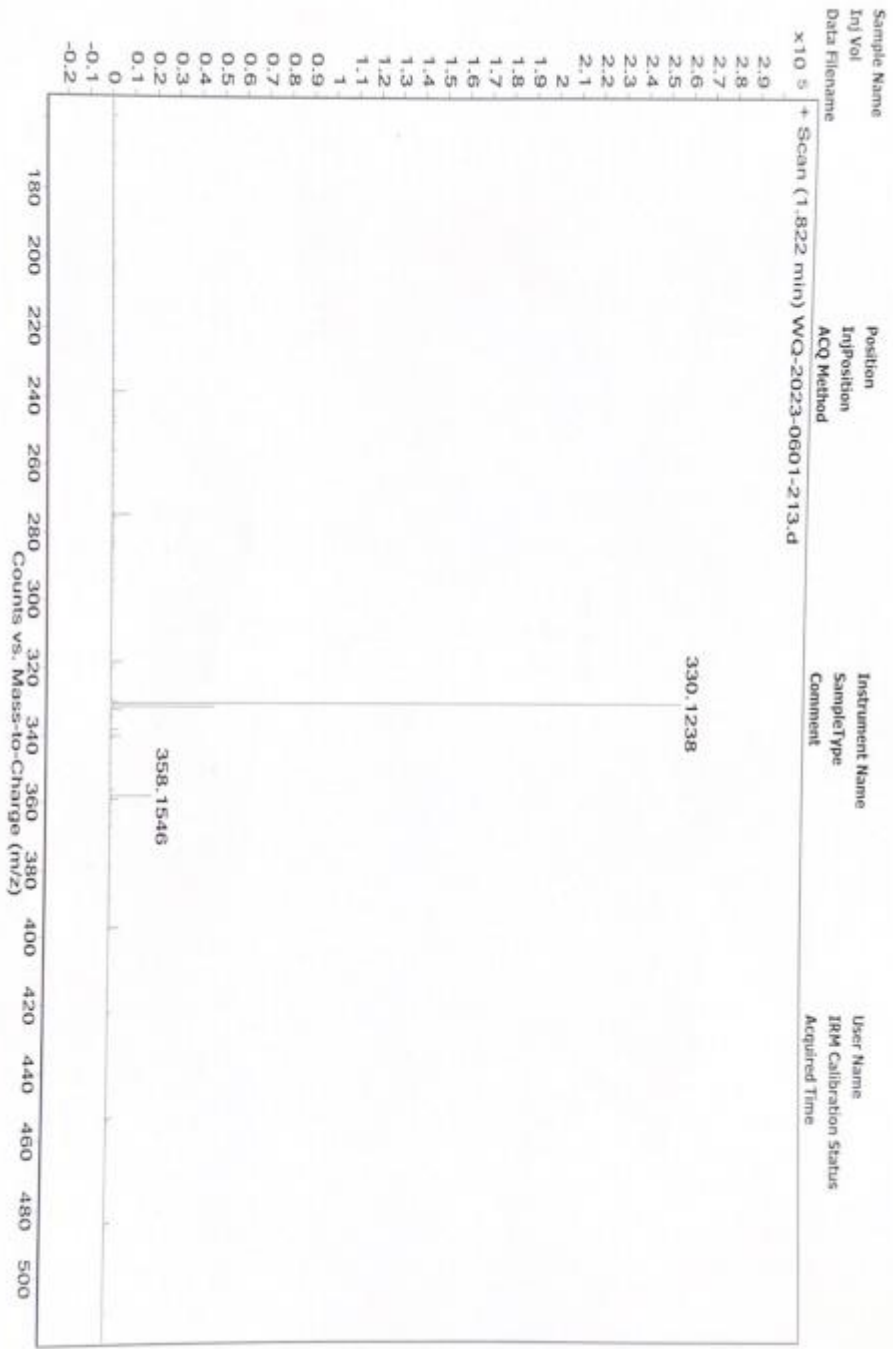



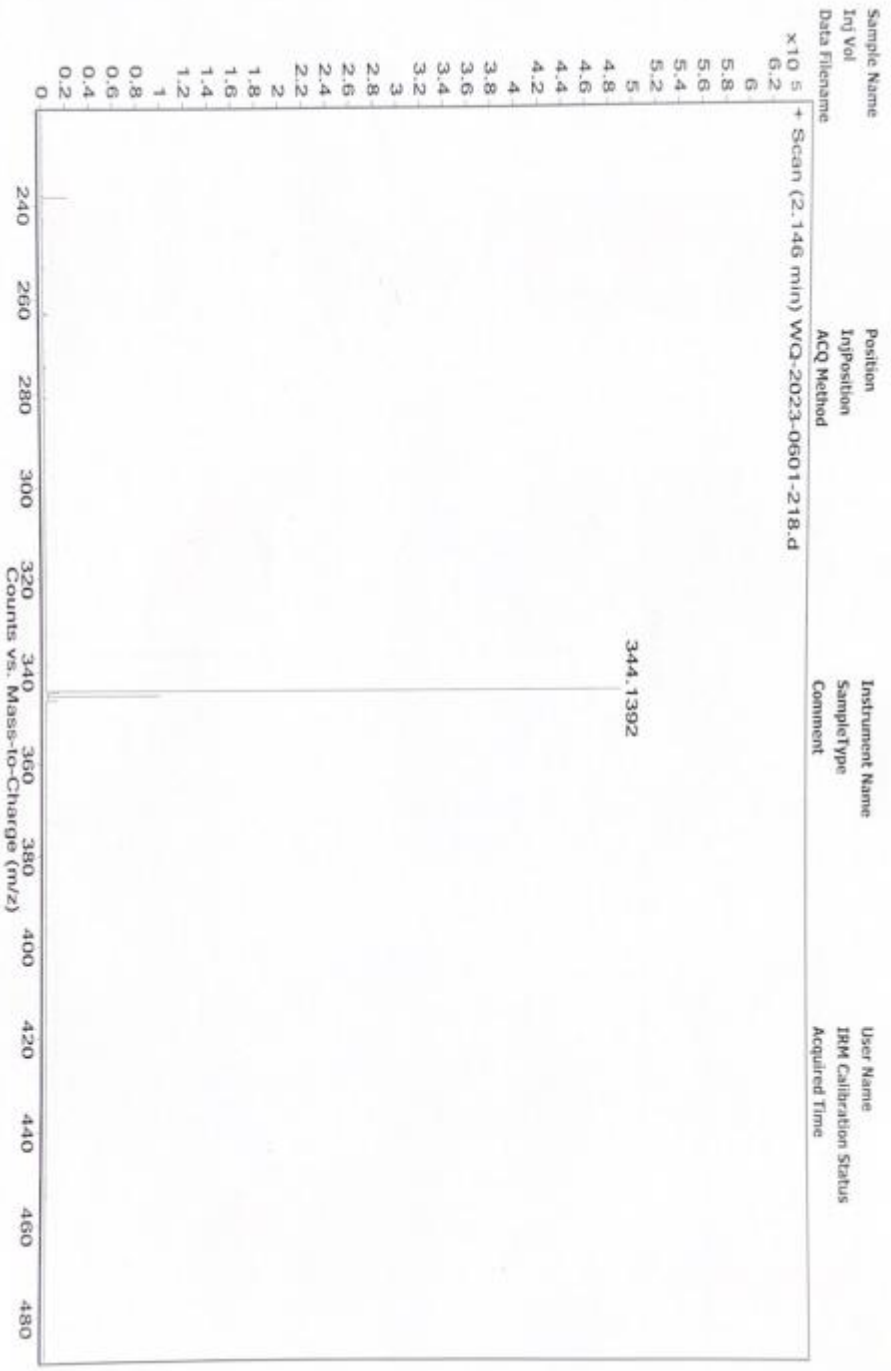





|               |             |                 |                        |
|---------------|-------------|-----------------|------------------------|
| Sample Name   | Position    | Instrument Name | User Name              |
| Inj Vol       | InjPosition | SampleType      | IRM Calibration Status |
| Data Filename | ACQ Method  | Comment         | Acquired Time          |

x10 5 + Scan (2.286 min) WQ-2023-0601-22.d

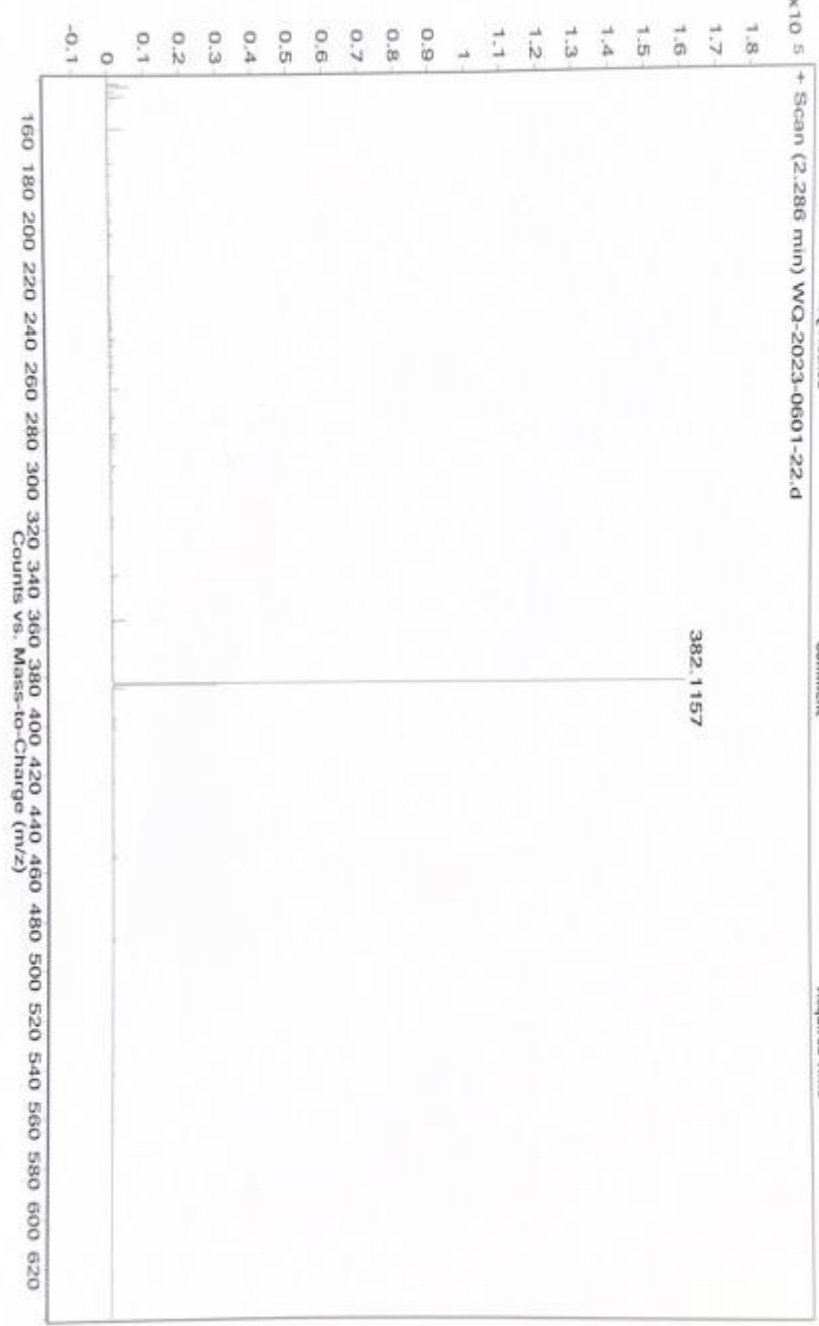



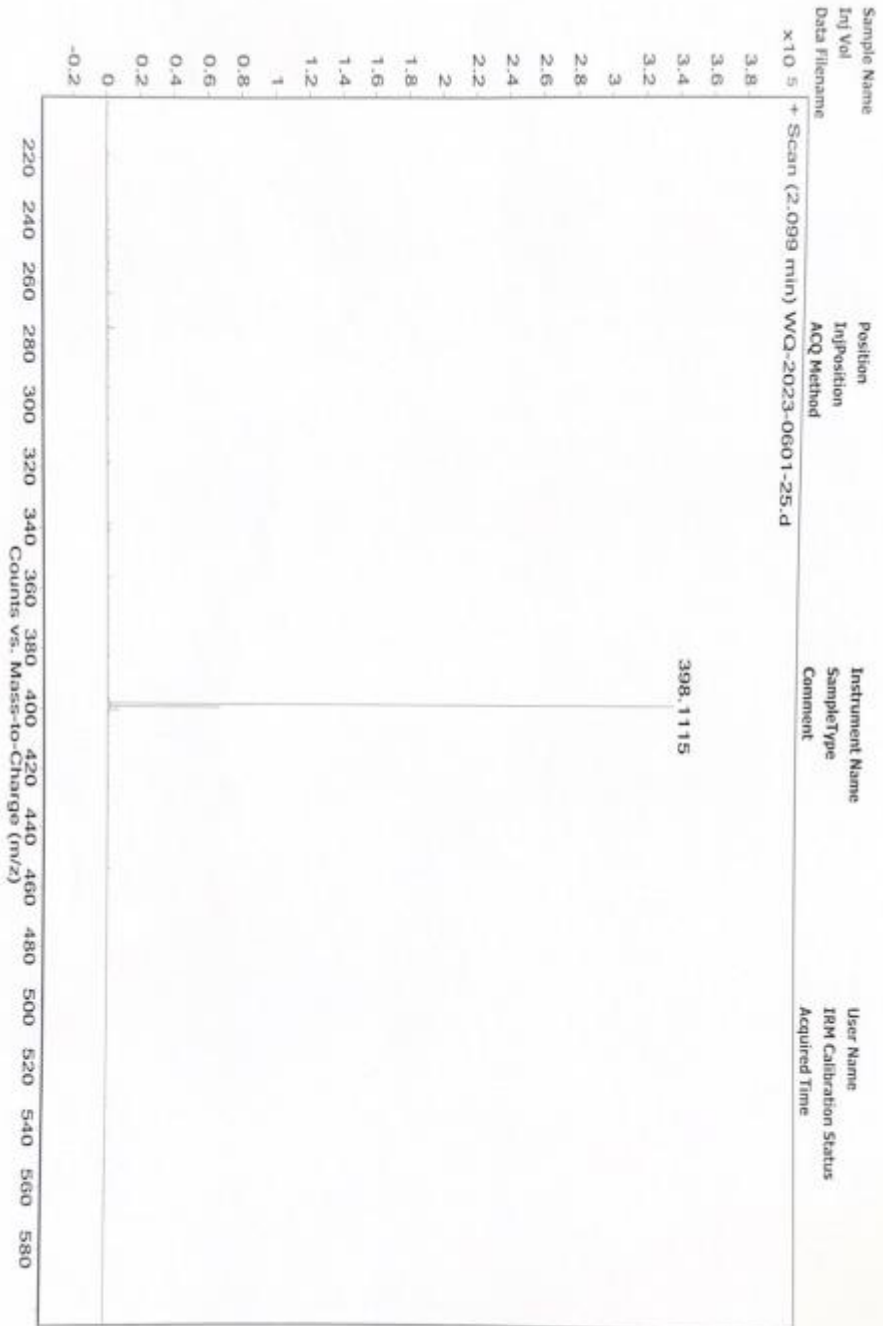



Sample Name ZX-2022-0301-137 Position Vial 37 Instrument Name Instrument 1 User Name  
Inj Vol 2 InjPosition ACQ Method 2020LXspo.m SampleType Sample IRM Calibration Status All Ions Missed  
Data Filename ZX-2022-0301-137.d ACQ Method 2020LXspo.m Comment  
x10 1 + Scan (3.469 min) ZX-2022-0301-137.d 3/1/2022 3:42:52 PM Acquired Time

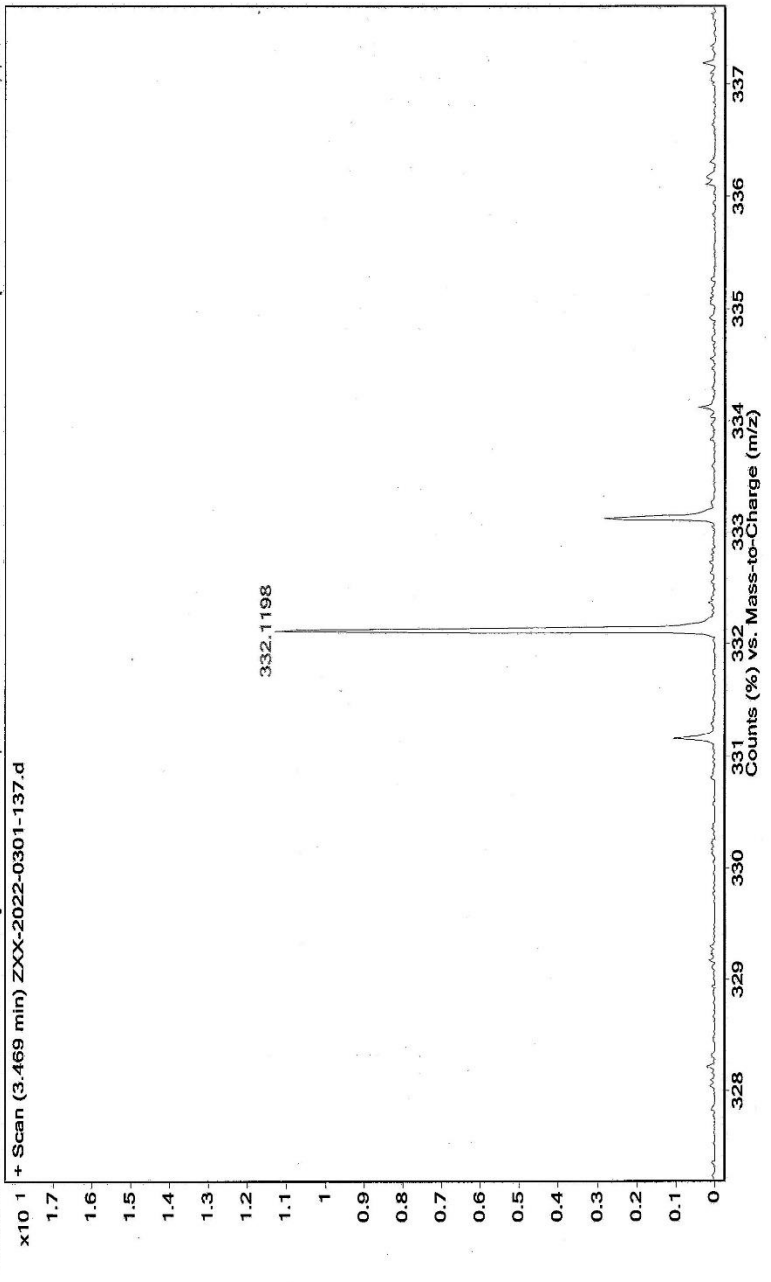

1025-1



**Sample Name** ZXX-2022-0224-122 **Position** Vial 22 **Instrument Name** Instrument.1 **User Name**  
**Inj Vol** 2 **InjPosition** **SampleType** Sample **IRM Calibration Status** All Ions Missed  
**Data Filename** ZXX-2022-0224-122.d **ACQ Method** 2020LXspo.m **Comment** **Acquired Time** 2/25/2022 12:38:31 AM

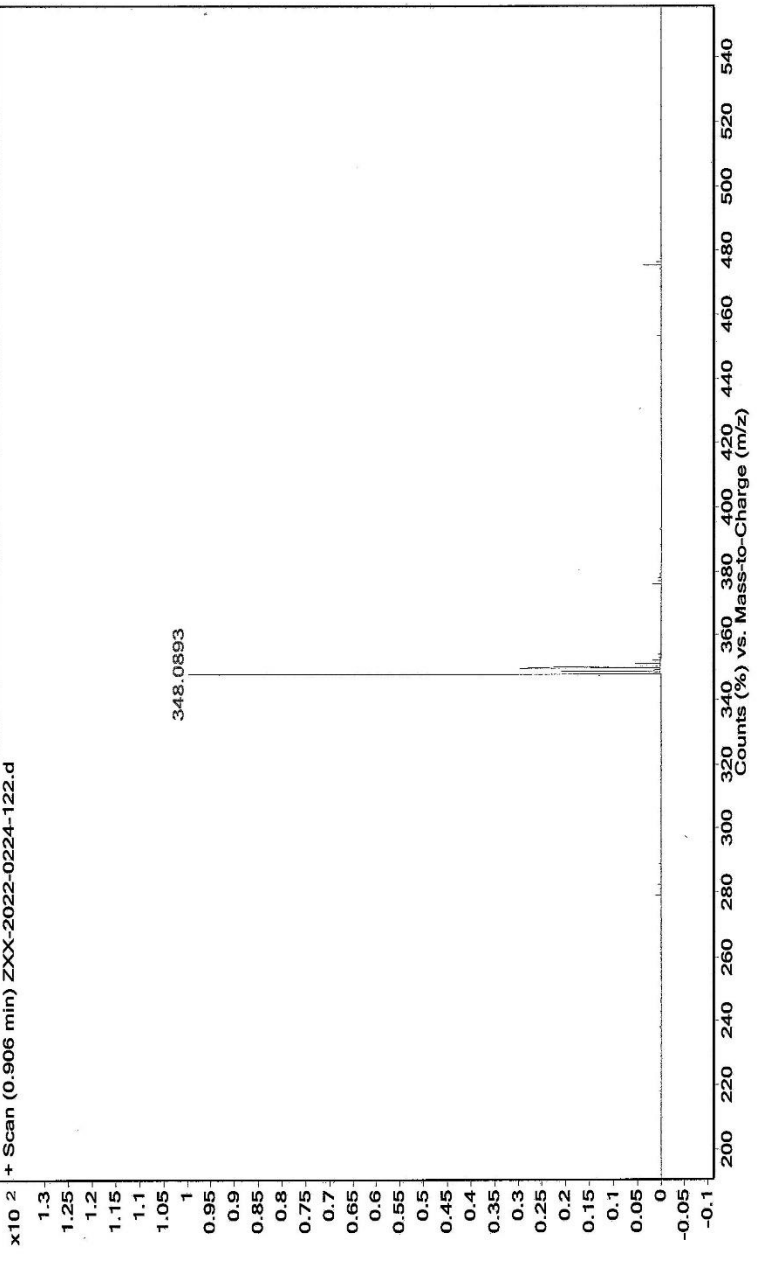

098-1





|               |             |                 |                        |
|---------------|-------------|-----------------|------------------------|
| Sample Name   | Position    | Instrument Name | User Name              |
| Inj Vol       | InjPosition | SampleType      | IRM Calibration Status |
| Data Filename | ACQ Method  | Comment         | Acquired Time          |

X10 5 + Scan (1.247 min) WQ-2023-0601-214.D

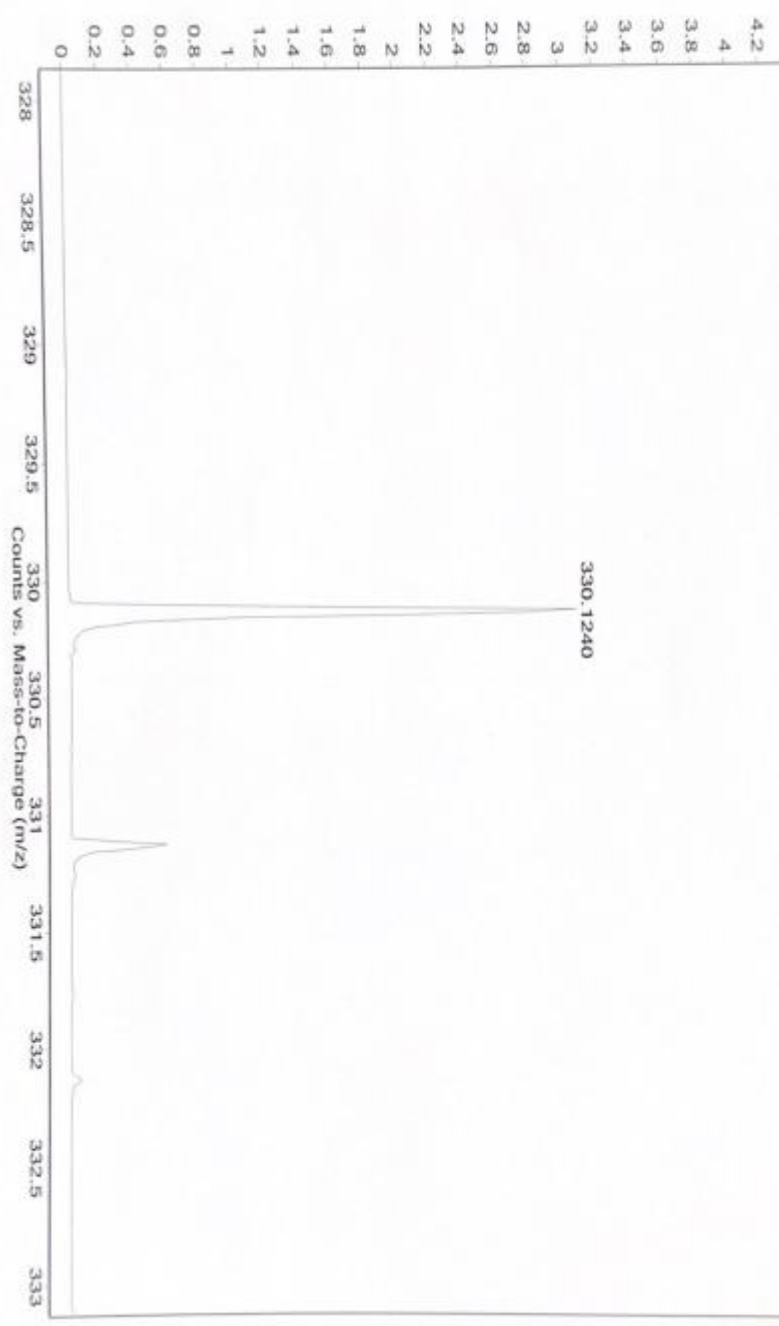

3-(3-(4-methoxyphenyl)-1H-pyrrolo[2,3-b]pyridin-5-yl)benzamide (38)

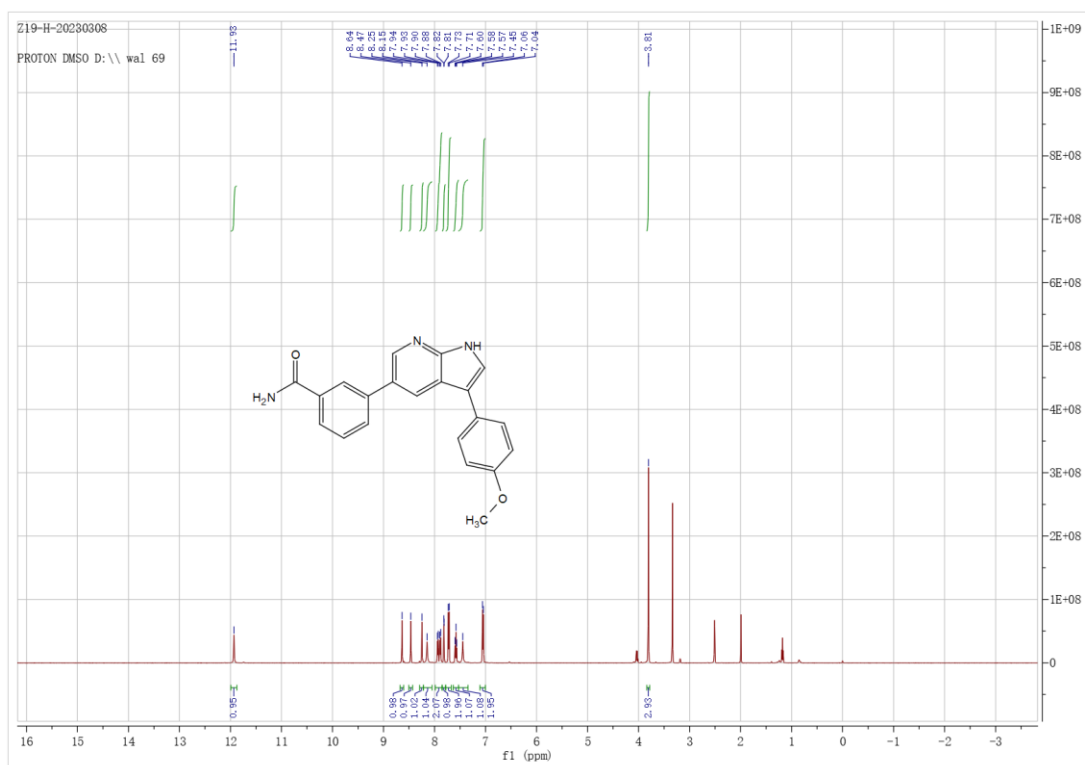

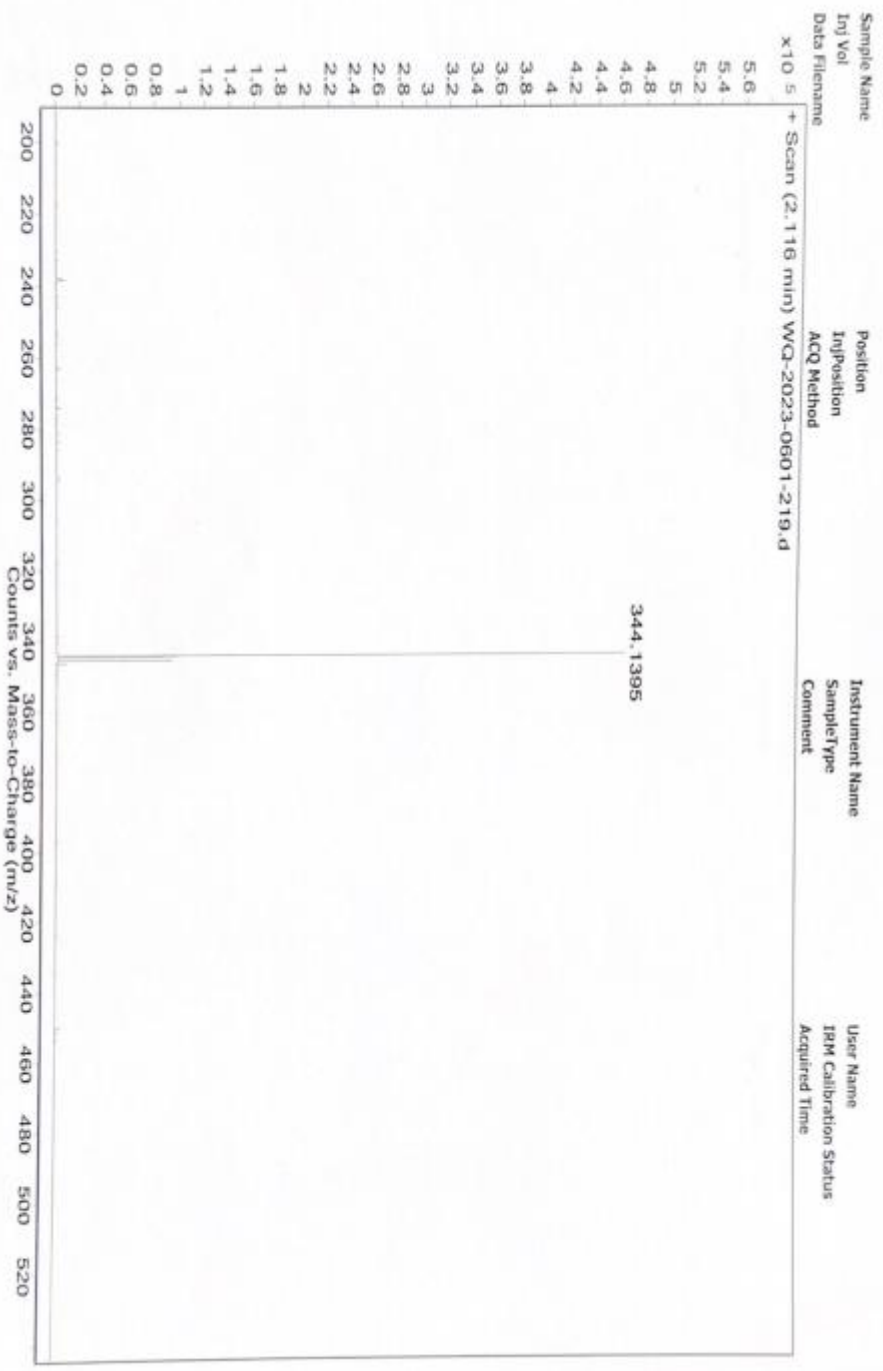

3-(3-(4-(trifluoromethyl)phenyl)-1H-pyrrolo[2,3-b]pyridin-5-yl)benzamide (39)

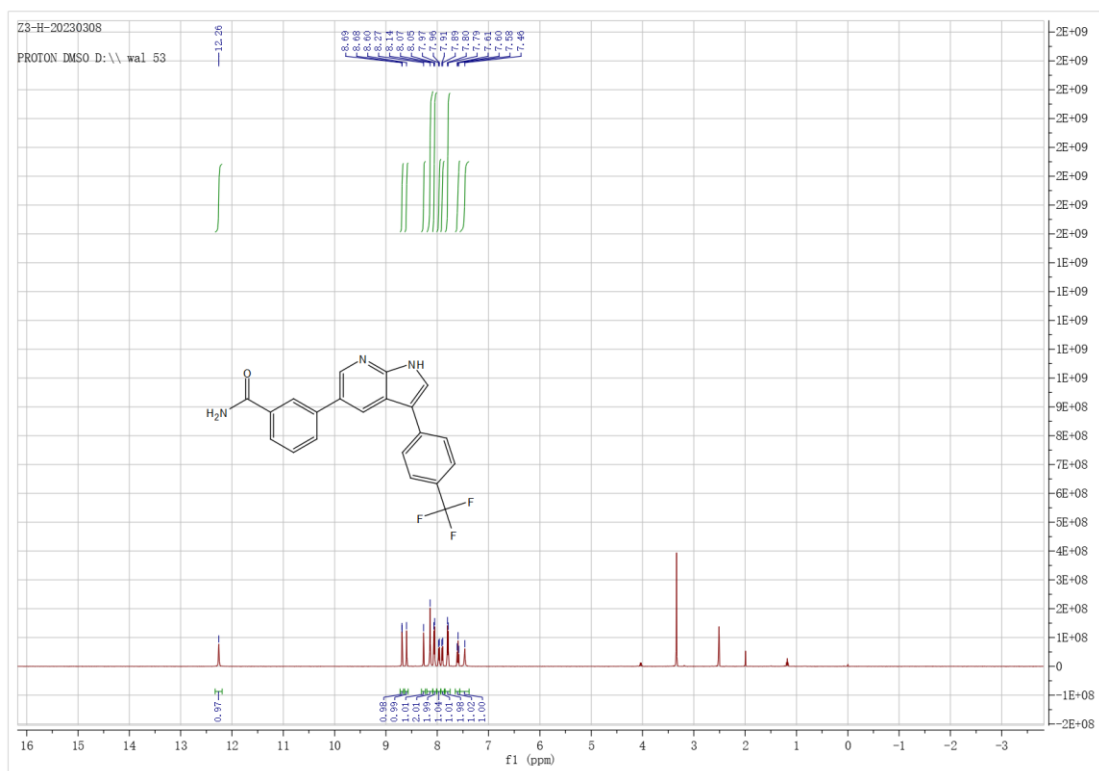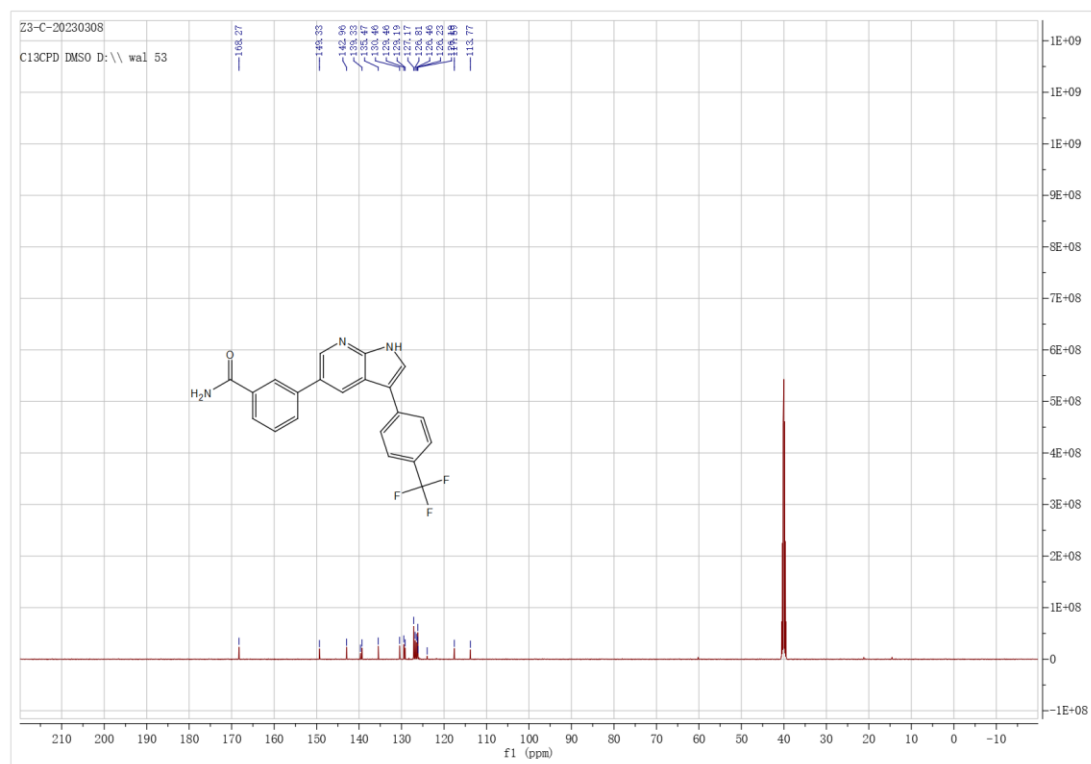

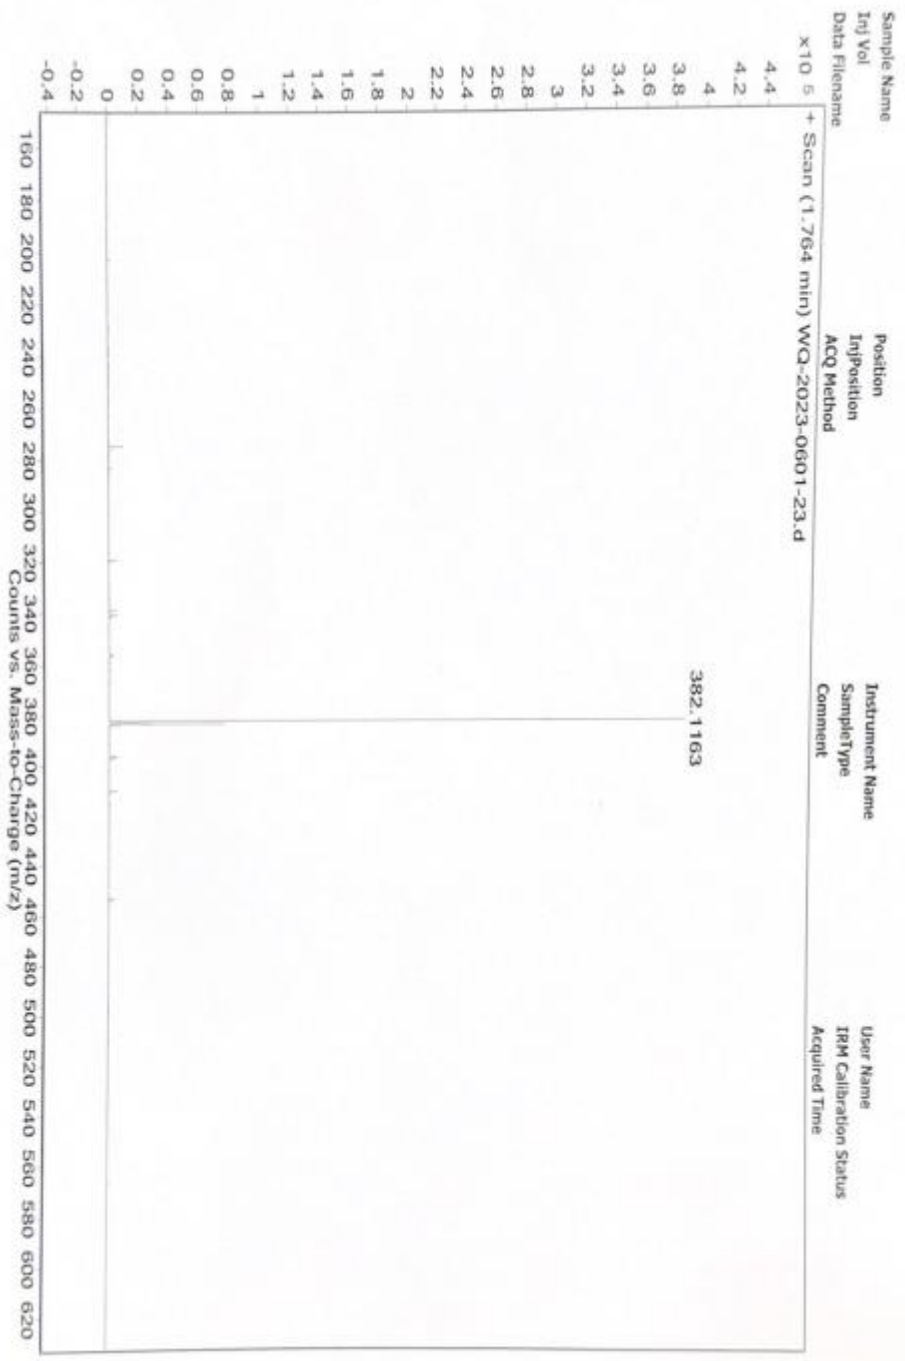



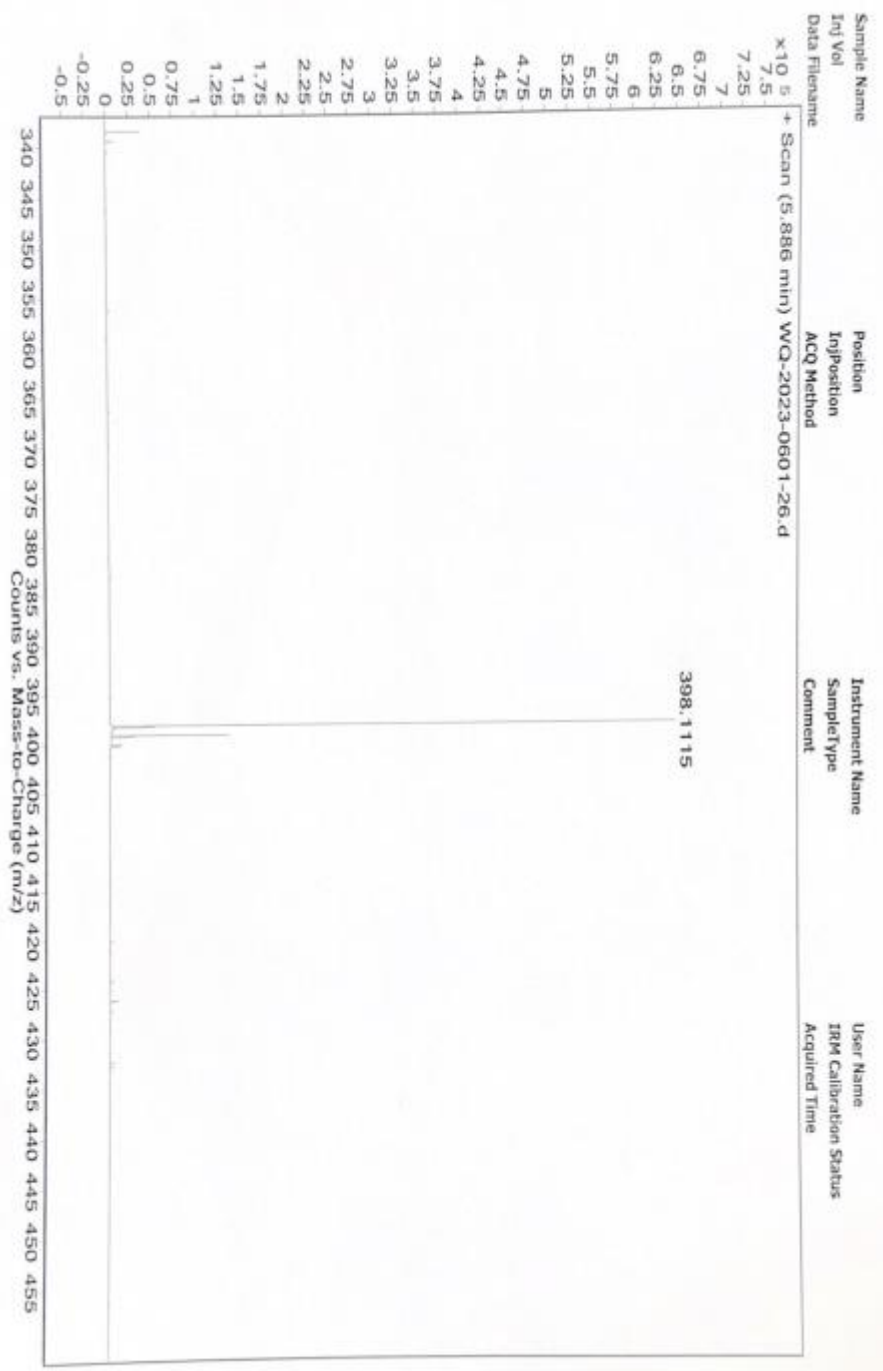

Supplement: IENZ_A_2305852_SM8817.pdf [file IENZ_A_2305852_SM8817.pdf]
